# Supplementary material for: Development of a Natural Product Optimization Strategy for inhibitors against the cell wall synthesis enzyme MraY, a promising antibacterial target
Source: Research Square preprint supplement (doi:10.21203/rs.3.rs-2804232/v1), 2023-05-16

**Supplementary Informations**

**Development of a Natural Product Optimization Strategy for inhibitors against the cell wall synthesis enzyme MraY, a promising antibacterial target**

Kazuki Yamamoto,1,2* Toyotaka Sato,3,4,5 Aili Hao,6 Kenta Asao,1 Rintaro Kaguchi,1 Shintaro Kusaka,1 Ruddarraju Radhakrishnam Raju,1 Daichi Kazamori,7 Kiki Seo,7 Satoshi Takahashi,8,9 Motohiro Horiuchi,3,4,5 Shin-ichi Yokota,10 Seok-Yong Lee,6 and Satoshi Ichikawa,1,2,11*

**Contents**

| **1. Supplementary figures** | **2-29** |
| --- | --- |
| **2. Detailed discussions** | **30-31** |
| **3. Preparation of the compounds** | **32-64** |
| **4. References** | **65-68** |
| **5. 1H, 13C NMR, and Mass spectrum of compounds** | **69-106** |

**1. Supplementary figures**

**Supplementary Fig. 1. Analyses of hydrazone formation and stability in assay conditions (general scheme and chromatograms of buffer only).**

| **a) general scheme** |
| --- |
| **b) buffer only**  MraY assay buffer    Mueller-Hinton-II broth (MHB) |
| LC-MS conditions; 5% to 90% MeCN in 0.1% *aq.* HCO2H gradient elusion. UV (254 nm) detector was used. Details were shown in the experimental section. |

*Detailed discussion*

We monitored the hydrazone formation using our set of core aldehydes and octanohydrazide (**AC56**) as a model hydrazide to optimize reaction conditions (Supplementary Fig. 1-5). For example, **TUNp-CHO** and **AC56** were mixed in DMSO in a microtube at room temperature for 30 minutes, and the mixture was concentrated under reduced pressure at room temperature overnight, and the progress of the reaction was subsequently analyzed by LC-MS. We observed a peak corresponding to **TUNp-CHO** completely disappeared while a new peak corresponding to a hydrazone concomitantly appeared, indicating that the desired *N*-octanoyl hydrazone (**TUNp-AC56**) formation proceeded quantitatively (Supplementary Fig. 2a, b). Next, the stability of the obtained **TUNp-AC56** under several assay conditions was investigated. The hydrazone barely decomposed in the MraY assay buffer at 25 °C for 3 hours (Supplementary Fig. 2c); however, in a bacteria culture medium at 37 °C for 18 hours, a small amount of **TUNp-CHO** was identified, but more than 70% of the hydrazone remained (Supplementary Fig. 2d). These results indicate that the hydrazone is sufficiently stable under the assay conditions to evaluate MraY inhibition and antibacterial activity. We also demonstrated that hydrazone formation with other core aldehydes and **AC56** proceeds cleanly (Supplementary Fig. 3b, 4b, 5b).

**Supplementary Fig. 2. Analyses of hydrazone formation and stability in assay conditions (TUNp-type).**

| a) **TUNp-CHO**    Retention time: 9.250 min. |
| --- |
| b) **TUNp-AC56**    Retention time: 13.717 min. Retention time: 19.550 min. |
| c) MraY assay buffer, 25 °C, 3 h      chromatogram extracted at  **TUNp-AC56**: 881.38  **TUNp-CHO**: 741.25  Retention time: 13.750 min. |
| d) MHB, 37 °C, 18 h      chromatogram extracted at  **TUNp-AC56**: 881.38  **TUNp-CHO**: 741.25  Retention time: 9.150 min. Retention time: 13.700 min. |

a) A peak at 9.3 minutes were identical to TUNp-CHO (cyan arrow). b) A peak at 13.7 minutes were identical to TUNp-AC56 (red arrow). Peaks at 5-7 min were results from injecting DMSO solutions, and a peak at 19-20 min were derived from treating microtube with DMSO, in which masses that appear to be polymers were detected. c) TUNp-AC56 were stable in the MraY assay buffer at 25 °C for 3 h. The peaks derived from hydrazone (10-15 min) and Triton X-100 (22.5 min) were detected. d) The TUNp-CHO peak overlapped the peaks derived from the broth. The mass peak of aldehyde oxidized carboxylic acid was not detected.

**Supplementary Fig. 3. Analyses of hydrazone formation and stability in assay conditions (MRYp-type).**

| a) **MRYp-CHO**    Retention time: 7.650 min. |
| --- |
| b) **MRYp-AC56**    Retention time: 12.350 min. |
| c) MraY assay buffer, 25 °C, 3 h      chromatogram extracted at  **MRYp-AC56**: 707.32  **MRYp-CHO**: 567.19  Retention time: 12.300 min. |
| d) MHB, 37 °C, 18 h      chromatogram extracted at  **MRYp-AC56**: 707.32  **MRYp-CHO**: 567.19  Retention time: 7.517 min. Retention time: 12.367 min. |

a) A peak at 7.7 minutes were identical to MRYp-CHO (cyan arrow). b) A peak at 12.4 minutes were identical to MRYp-AC56 (red arrow). Peaks at 5-7 min were results from injecting DMSO solutions, and a peak at 19-20 min were derived from treating microtube with DMSO, in which masses that appear to be polymers were detected. c) MRYp-AC56 were stable in the MraY assay buffer at 25 °C for 3 h. The peaks derived from hydrazone (12.0-12.5 min.) and Triton X-100 (22.5 min.) were detected. d) The MRYp-CHO peak was detected at 7.5 minutes.

**Supplementary Fig. 4. Analyses of hydrazone formation and stability in assay conditions (MRDp-type).**

| a) **MRDp-CHO**    Retention time: 11.050 min. |
| --- |
| b) **MRDp-AC56**    Retention time: 12.900 min. Retention time: 13.850 min. |
| c) MraY assay buffer, 25 °C, 3 h    chromatogram extracted at  **MRDp-AC56**: 791.37  **MRDp-CHO**: 651.24    Retention time: 11.683 min. Retention time: 13.883 min. |
| d) MHB, 37 °C, 18 h      chromatogram extracted at  **MRDp-AC56**: 791.37  **MRDp-CHO**: 651.24  Retention time: 10.700 min. Retention time: 13.883 min. |

a) A peak at 11 minutes were identical to MRDp-CHO (cyan arrow). b) A peak at 13.9 minutes were identical to MRDp-AC56 (red arrow). An unknown peak was detected at 12.9 minutes. c) MRDp-AC56 were stable in the MraY assay buffer at 25 °C for 3 h. The peaks derived from hydrazone (13.5-14 min.) and Triton X-100 (22.5 min.) were detected. No mass of MRDp-CHO was detected in the peak with the same retention time as the MRDp-CHO. d) The MRDp-CHO peak overlapped the peaks derived from the broth. The mass peak of aldehyde oxidized carboxylic acid was not detected.

**Supplementary Fig. 5. Analyses of hydrazone formation and stability in assay conditions (CAP-type).**

| a) **CAP-CHO**    Retention time: 5.500 min. |
| --- |
| b) **CAP-AC56**    Retention time: 13.350 min. Retention time: 19.100 min. |
| c) MraY assay buffer, 25 °C, 3 h    chromatogram extracted at  **CAP-AC56**: 570.24  **CAP-CHO**: 430.11    Retention time: 5.533 min. Retention time: 13.350 min. |
| d) MHB, 37 °C, 18 h      chromatogram extracted at  **CAP-AC56**: 570.24  **CAP-CHO**: 430.11  Retention time: 5.533 min. Retention time: 13.233 min. |

a) A peak at 5.5 minutes were identical to CAP-CHO (cyan arrow). b) A peak at 13.4 minutes were identical to CAP-AC56 (red arrow). An unknown peak was detected at 19 and 21 minutes. c) MRDp-AC56 were stable in the MraY assay buffer at 25 °C for 3 h. The peaks derived from hydrazone (13.5-14 min.) and Triton X-100 (22.5 min.) were detected. No mass of CAP-CHO was detected in the peak with the same retention time as the CAP-CHO. d) The CAP-CHO peak overlapped the peaks derived from the broth. The mass peak of aldehyde oxidized carboxylic acid was not detected.

**Supplementary Fig. 6. LC-MS analysis of the library (excerpts).**

| MRYp-BZ1 | MRYm-BZ2 |
| --- | --- |
| TUNp-BZ3 | TUNm-BZ4 |
| MRDp-BZ5 | MRDp-BZ6 |
| CAP-BZ7 | MRYp-BZ8 |
| MRYm-BZ9 | TUNp-BZ10 |
| TUNm-BZ11 | MRDp-BZ12 |
| MRDm-BZ13 | CAP-BZ14 |
| MRYp-BZ15 | MRYm-BZ16 |
| TUNp-BZ17 | TUNm-BZ18 |
| MRDp-BZ19 | MRDm-BZ20 |
| CAP-BZ21 | MRYp-BZ22 |
| MRYm-BZ23 | TUNp-BZ24 |
| TUNm-BZ25 | MRDp-BZ26 |
| MRDm-BZ27 | CAP-BZ28 |
| MRYp-BZ29 | MRYm-BZ30 |
| TUNp-BZ31 | TUNm-BZ32 |
| MRDp-BZ33 | MRDm-BZ34 |
| CAP-BZ35 | MRYp-BZ36 |
| MRYm-BZ37 | TUNp-BZ38 |
| TUNm-BZ39 | MRDp-BZ40 |
| MRDm-BZ41 | CAP-BZ42 |
| MRYp-BZ43 | MRYm-BZ44 |
| TUNp-BZ45 | TUNm-BZ46 |
| MRDp-BZ47 | MRDm-PA48 |
| CAP-PA49 | MRYp-PA50 |
| MRYm-PA51 | TUNp-PA52 |
| TUNm-PA53 | MRDp-PA54 |
| MRDm-AC55 | CAP-AC56 |
| MRYp-AC57 | MRYm-AC58 |
| TUNp-AC59 | TUNm-AC60 |
| MRDp-AC61 | MRDm-AA62 |
| CAP-AA63 | MRYp-AA64 |
| MRYm-AA65 | TUNp-AA66 |
| TUNm-AA67 | MRDp-AA68 |
| MRDm-LA69 | CAP-LA70 |
| MRYp-LA71 | MRYm-LA72 |
| TUNp-LA73 | TUNm-LA74 |
| MRDp-LA75 | MRDm-LA76 |
| CAP-LA77 | MRYp-LA78 |
| MRYm-LA79 | TUNp-LA80 |
| TUNm-LA81 | MRDp-LA82 |
| MRDm-LA83 | CAP-LA84 |
| MRYp-LA85 | MRYm-LA86 |
| TUNp-LA87 | TUNm-LA88 |
| MRDp-LA89 | MRDm-LA90 |
| CAP-LA91 | MRYp-LA92 |
| MRYm-LA93 | TUNp-LA94 |
| TUNm-LA95 | MRDp-LA96 |
| MRDm-LA97 | CAP-LA98 |
| conditions: LC-MS; 5% to 90% MeCN in 0.1% *aq.* HCO2H gradient elusion.  Experimental details are shown in methods section of the main text. | |

**Supplementary Fig. 7. MraY inhibitory activity of core aldehydes.**

| a) | b) |
| --- | --- |
| c) | d) |
| e) | f) |
|  |  |
| Compound concentrations: 0.0001, 0.001, 0.01, 0.1, 1, 10, 100 μM  Experimental details are shown in methods section of the main text. | |

**Supplementary Fig. 8. Antibacterial activity of fragments.**

|  |  |
| --- | --- |
| *E. faecium* ATCC 35667, *S. aureus* ATCC 29213, *P. aeruginosa* ATCC 27853, *K. pneumoniae* ATCC 13883, *E. coli* ATCC 25922, *E. cloacae* ATCC 13047, *A. baumannii* ATCC 19606. | |

**Supplementary Fig. 9. LC-MS analyses of re-synthesized hydrazones.**

| a) BZ2_resynthesis    library    double injection    ↓retention time: 13.067 min (resynthesis)    *m*/*z* 371.6 [(M+2H)/2]+, 741.4 [(M+H)]+ | b) AA63_resynthesis    library    double injection    ↓retention time: 11.017 min (resynthesis)    *m*/*z* 386.8 [(M+2H)/2]+, 770.4 [(M+H)]+ |
| --- | --- |
| c) LA89_resynthesis    library    double injection    ↓retention time: 11.183 min (resynthesis)    *m*/*z* 418.3 [(M+2H)/2]+, 835.5 [(M+H)]+ | d) LA80_resynthesis    library    double injection    ↓retention time: 16.917 min (resynthesis)    *m*/*z* 454.0 [(M+2H)/2]+, 906.6 [(M+H)]+ |

| e) LA92_resynthesis    library    double injection    ↓retention time: 14.750 min (resynthesis)    *m*/*z* 316.7 [(M+3H)/3]+, 474.4 [(M+2H)/2]+,  947.7 [(M+H)]+ | f) LA98_resynthesis    library    double injection    ↓retention time: 13.533 min (resynthesis)    *m*/*z* 359.4 [(M+3H)/3]+, 538.6 [(M+2H)/2]+,  1075.8 [(M+H)]+ |
| --- | --- |
| conditions: LC-MS; 5% to 90% MeCN in 0.1% *aq.* HCO2H gradient elusion.  Experimental details are shown in methods section of the main text. | |

UV chromatograms ‘library’ are results of analysis of the library compounds in the corresponding well. All resynthesized hydrazones were identical to the main compound in the library from UV chromatograms of ‘double injection’.

**Supplementary Fig. 10. 1H NMR spectra of re-synthesized hydrazones.**

| 1H NMR spectra of MRYp-CHO (green) and hydrazone (brown). [CD3OD, 500 MHz] |
| --- |
| a) MRYp-BZ2 |
| 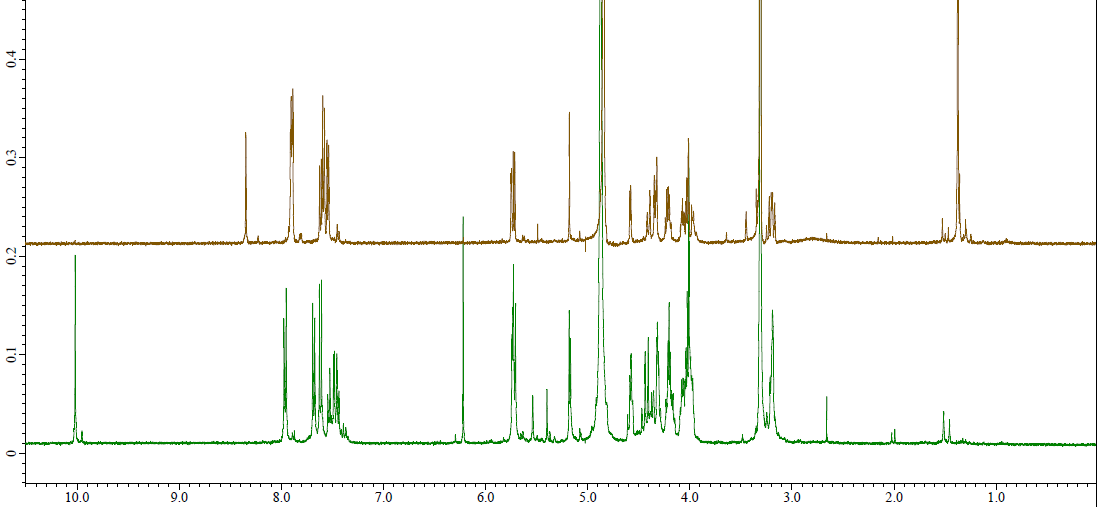 |
| b) MRYp-AA63 |
| 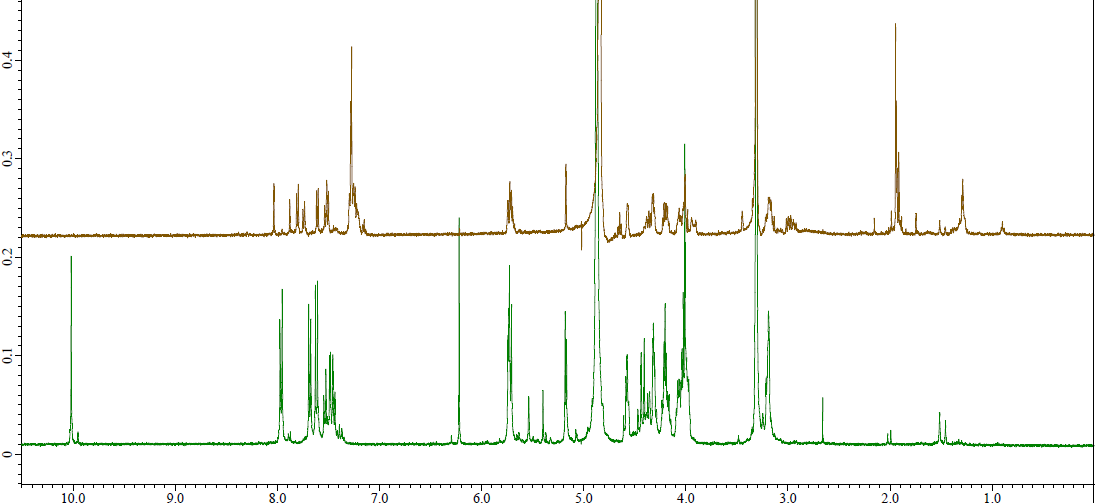 |
| c) MRYp-LA89 |
| 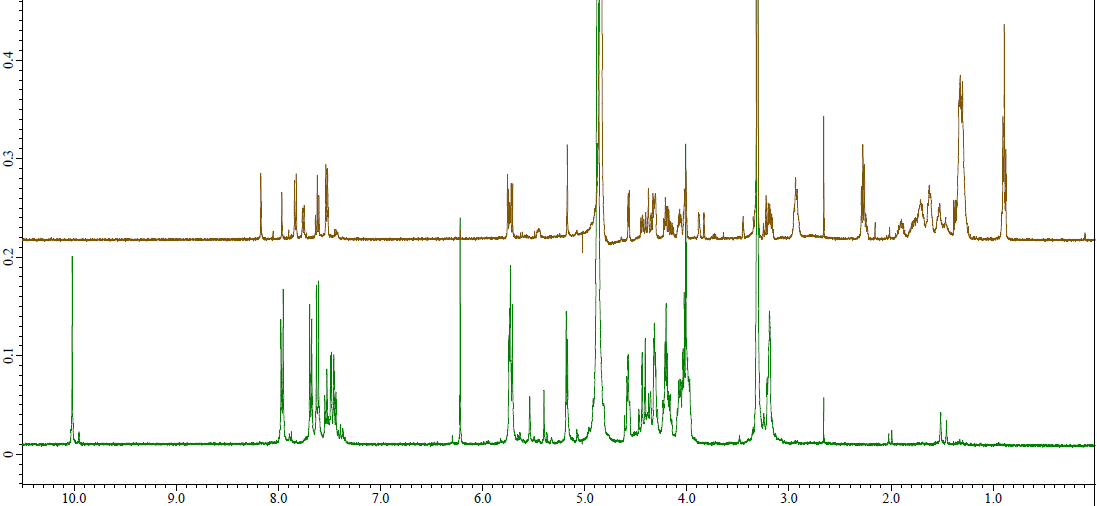 |

| d) MRYp-LA80 |
| --- |
| 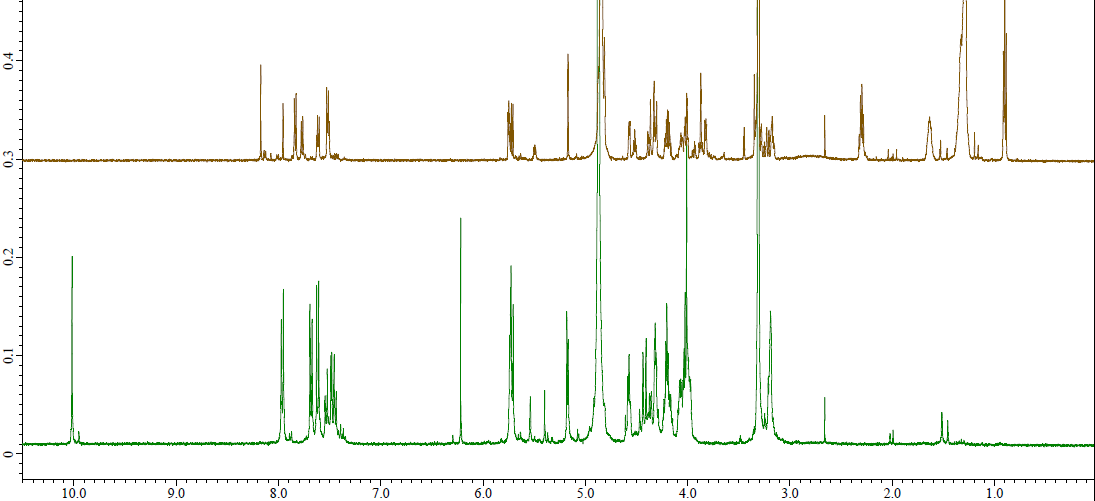 |
| e) MRYp-LA92 |
| 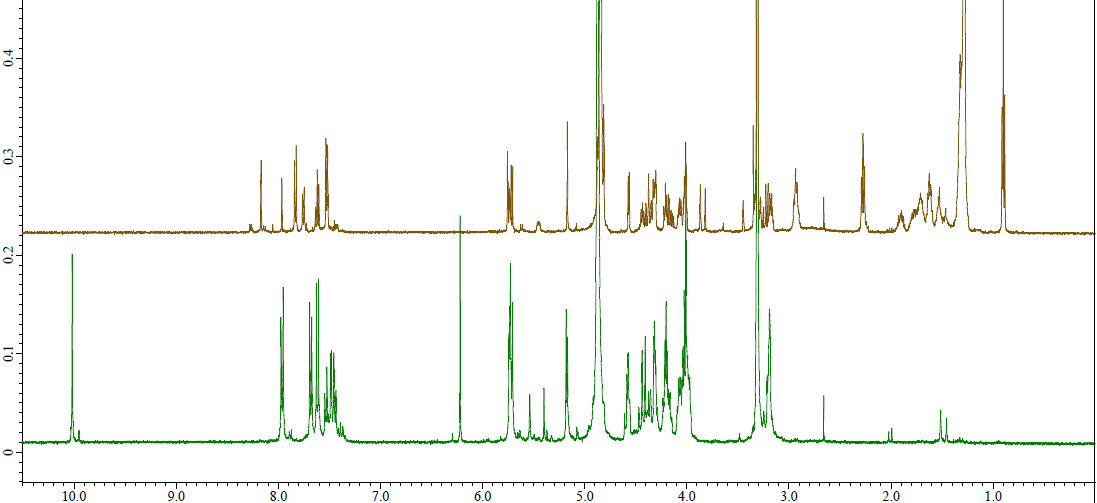 |
| f) MRYp-LA98 |
| 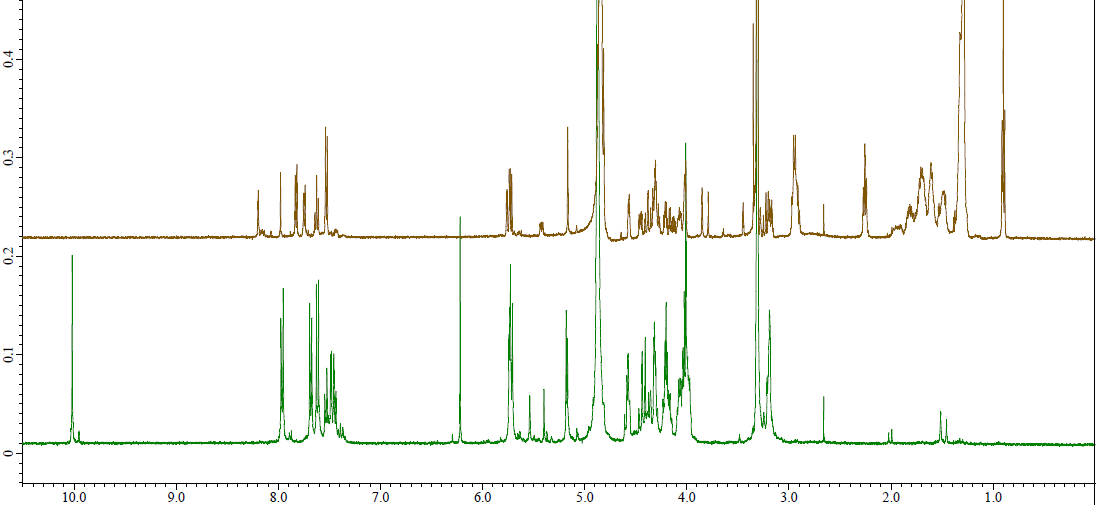 |

The spectrum of aldehyde (green) is shown as a mixture of aldehyde and hydrate/hemiacetal. The peak at 10 ppm is C*H*O and the peak at 6.2 ppm is corresponding C*H*OH(OR). The structure of aldehyde is determined by 1H NMR in D2O (see preparation of compounds section). a) MRYp-BZ2 appears to exist almost exclusively as a single isomer (8.3 ppm; C*H=*N-N). b-f) The other hydrazones derived from amino acids appear to be a mixture of *E*/*Z* isomers (8.0 and 8.1-8.2 ppm, ratio 4:6~5:5). The peak of C*H*O of aldehyde disappeared in all hydrazone spectra (brown).

**Supplementary Fig. 11. MraY inhibitory activity of re-synthesized hydrazones.**

|  |  |
| --- | --- |
|  |  |
|  |  |
| Compound concentrations: 0.001, 0.01, 0.1, 1, 10, 100, 1000 nM  Experimental details are shown in methods section of the main text. | |

**Supplementary Fig. 12. MraY inhibitory activity of the stable analogues 1-8.**

|  |  |
| --- | --- |
|  |  |
|  |  |
|  |  |
| Compound concentrations: 0.1, 1.1, 3.3, 10, 30, 90, 1000 nM  Experimental details are shown in methods section of the main text. | |

**Supplementary Table 1. Cytotoxic activity of stable analogues 1-8 against HepG2 cells.**

|  | amide MRY | | | | anilide MRY | | | |
| --- | --- | --- | --- | --- | --- | --- | --- | --- |
|  | **1** | **2** | **3** | **4** | **5** | **6** | **7** | **8** |
| IC50 (µM) | 38 | 41 | 45 | 40 | 46 | 66 | 45 | 52 |

Experimental details are shown in methods section of the main text.

**Supplementary Table 2. Antibacterial activity against ESKAPE of known drugs in the library screening.**

Material source

|  | supplier | code | Lot. |
| --- | --- | --- | --- |
| vancomycin | Aldrich | 861987-1G | 087K0694 |
| ramoplanin | Aldrich | R1781-250MG | SLBV1752 |
| ampicillin | wako | 017-10381 | TSR3767 |
| streptomycin | TCI | S0585 | R07IM-IC |
| colistin | TCI | C2930 | DTY3C-IB |
| polymyxin B | TCI | P1923 | IJ3PM-LP |
| erythromycin | nacalai-tesque | 14549-94 | M5A6030 |
| azithromycin | TCI | A2076 | 3PY8J-JS |
| daptomycin | TCI | D4229 | NOMJH-AT |
| rifampicin | TCI | R0079 | 6K4AF-GH |
| tunicamycins | wako | 202-08241 | PTK1898 |

**2. Detailed discussions**

**2-1. Elucidation of MraY inhibitory activity of the hydrazone library (Fig. 2)**

The library was directly screened using a fluorescent-based MraY assay46-49 to measure inhibition. The MraY inhibitory activity of each sub-libraries was evaluated at a certain concentration one order of magnitude above the IC50 value of the parent natural products (100 nM of TUN and MRD, 10 nM of MRY, 1000 nM of CAP sub-library), where differences tend to be more obvious.

The results of the TUN sub-library are shown in Fig. 2b. The core aldehydes **TUNp-CHO** and **TUNm-CHO** exhibited almost no inhibition at 10 μM, which represents a nearly 100-fold decrease in activity compared to the parent tunicamycin (Supplementary Fig. 7a, b).38 The TUNm-library showed a similar trend to TUNp-library. The analogues of BZ-, PA-, AC-, and AA-type hydrazones exhibited almost no inhibitory activity for TUN sub-library. On the other hand, among LA-types having long-chain lipophilic substituents (isostearoyl and palmitoyl group), **TUNp-LA71** and **TUNp-LA72**, which have Ala, **TUNp-LA75** and **TUNp-LA76**, which have Phe, and **TUNp-LA79** and **TUNp-LA80**, which have Ser, exhibits improved MraY inhibition (50-80% inhibition at 100 nM) relative to the parent tunicamycin (~40% inhibition at 100 nM).38 In addition, **TUNp-LA83** and **TUNp-LA84**, which have Glu, **TUNp-LA91** and **TUNp-LA92**, which have Lys, and **TUNp-LA95** and **TUNp-LA96**, which have Arg, were equipotent to or possessed slightly reduced activity compared to the natural tunicamycin. Taken together, these results suggest that the long-chain lipophilic acyl group substantially contributes to the observed MraY inhibition.

The results of the MRY sub-library are shown in Fig. 2c. The core aldehydes **MRYp-CHO** and **MRYm-CHO** exhibit only about 10% inhibition at 100 nM (Supplementary Fig. 7c, d). Compared to the TUN sub-library, more hydrazones exhibited improved inhibition relative to the parent MRY-core. In the BZ- and PA-type hydrazones among MRYp-library, the inhibitory potency of hydrazones containing lipophilic substituents at the *para*-position of the aromatic ring of the hydrazine tended to be high, and in particular, **MRYp-BZ2** exhibited remarkable inhibition of MraY (90% inhibition at 10 nM). In the AC-, AA-, and LA-type hydrazones, the length of the alkyl group correlated with the inhibition, which was congruent with previous reports.45,50 In particular, those with LA-type long-chain acyl groups (isostearoyl and palmitoyl group) are preferable although there is no remarkable preference between amino acid residues, and **MRYp-LA84**, which has Glu, and **MRYp-LA92**, which has Lys, exhibited particularly potent MraY inhibition (80% inhibition at 10 nM). These results suggest that the hydrazine fragment moiety of the MRY sub-library extends in the direction of the lipophilic groove, and the lipophilic interaction favorably affects MraY inhibition. Although MRYm-library showed roughly a similar trend to MRYp-library, the inhibition potency was greatly reduced in some hydrazones (**MRYm-BZ2** and **MRYm-BZ47**). This difference in potency may be due to the substitution position of the hydrazone bond, which directs hydrophobic substitutions in a different orientation resulting in reduced interactions with MraY.

The results of the MRD-type library are shown in Fig. 2d. The core aldehyde **MRDp-CHO** and **MRDm-CHO** exhibits ~15% inhibition of MraY at 100 nM (Supplementary Fig. 7e, f).43 While most hydrazones did not inhibit MraY at 100 nM, some hydrazones did display more potent inhibition than the cores; namely **MRDp-BZ6**, **MRDp-BZ9**, **MRDp-BZ37**, **MRDp-BZ38**, **MRDp-LA97**, **MRDm-PA54**, **MRDm-LA69**, and **MRDm-LA97**. Interestingly, linking to the fragment **LA97** resulted in potent inhibition independent of *p*- or *m*-substitution. The MRD sub-library showed a different trend than the other two sub-libraries wherein, the inhibition was not enhanced by the addition of a lipophilic alkyl chain.43

The results of the CAP sub-library are shown in Fig. 2e. The **CAP-CHO** core aldehyde possessed the weakest MraY inhibition of all of the core aldehydes examined with only ~15% inhibition at 1000 nM (Supplementary Fig. 7g). In the CAP sub-library, hydrazones containing amino acid (AA and LA-type) exhibited weak inhibition, whereas BZ-type hydrazones were more potent. This result is the opposite of the MRY and TUN sub-libraries and suggests that aromatic substituents, not lipophilic alkyl chains, enhance the affinity for MraY in the CAP sub-library.

**2-2. Elucidation of antibacterial activity of the hydrazone library (Fig. 3)**

Antibacterial activity of vancomycin and colistin were shown in Fig. 3 and antibacterial activity of other antibiotics were shown in Supplementary Table 2.

In the TUN sub-library, BZ-, PA-, AC-, and AA-type hydrazones exhibited no antibacterial activity or MraY inhibition, while analogues possessing **LA76** and **LA79** exhibited antibacterial activity against gram-positive bacteria equal to or higher than that of natural tunicamycin yielding a minimum inhibitory concentration (MIC) 50 μM against *E. faecium*, which was consistent with their improved MraY inhibition (Fig. 3a, Supplementary Table 1). In addition, the antibacterial spectrum of hydrazones possessing fragments **LA91**, **LA92**, **LA94**, **LA96**, and **LA98** containing basic amino acid residues, Lys or Arg, expanded the spectrum to include gram-negative bacteria (MIC 50 μM against *A. baumannii*).

In the MRY sub-library, the LA-type hydrazones exhibited higher antibacterial activity, a trend also observed with the TUN sub-library (Fig. 3b). In particular, **MRYp-LA71**, **MRYp-LA72**, **MRYp-LA79**, **MRYp-LA80**, **MRYp-LA87**, and **MRYp-LA88**, which have Ala, Ser, or Gln residue, showed potent antibacterial activity against *S. aureus* with MICs below 0.5 μM. Moreover, the antibacterial spectrum of **MRYp-LA91**, **MRYp-LA92**, and **MRYp-LA98**, which contain a Lys residue expanded the spectrum of activity to include gram-negative bacteria (MIC <0.5 μM against *E. coli* and *K. pneumoniae*). On the other hand, **MRYp-BZ2**, whose MraY inhibition was as potent as the LA-type, showed no antibacterial activity. These results are consistent with previous reports,45,50 and suggest that the bacterial membrane permeability is limited by the high polarity of the core structure.

Unlike the TUN and MRY sub-libraries mentioned above, few hydrazones exhibited antibacterial activity for MRD and CAP sub-libraries (Fig. 3c, d). Only weak antibacterial activity with MICs of 50 μM was observed for some analogues. In general, the active hydrazones possess a basic Lys or Arg residue and a long acyl chain, similar to other cationic antimicrobial lipopeptides. Unfortunately, the hydrazones in the MRD and the CAP sub-libraries did not enhance the antibacterial activity compared to the activity of fragments (Supplementary Fig. 8).

**3. Preparation of compounds**

**General experimental methods**

All reactions except those carried out in the aqueous phase were performed under an argon atmosphere unless otherwise noted. Materials were purchased from commercial suppliers and used without further purification unless otherwise noted. Solvents were distilled according to the standard protocol. Isolated yields were calculated by weighing products. The weight of the starting materials and the products were not calibrated. Analytical thin layer chromatography (TLC) was performed on Merck silica gel 60F254 plates. Normal-phase column chromatography was performed on Merck silica gel 5715 or Wakogel 60N. Flash column chromatography was performed on Kanto Chemical Silica Gel 60N (spherical, neutral. 40-50 m). 1H NMR was measured in CDCl3, DMSO-*d*6, and methanol-*d*4 solution, and reported in parts per million () relative to tetramethylsilane (0.00 ppm) as an internal standard using JEOL ECS400, ECX400, ECZ400, ECA500, unless otherwise noted. 13C NMR was measured in CDCl3 or methanol-*d­*4 solution, and referenced to residual solvent peaks of CDCl3 (77.16 ppm) or methanol-*d*4 (49.00 ppm) using JEOL ECS400, ECX400, ECZ400, ECA500. Coupling constant (*J*) was reported in hertz (Hz). Abbreviations of multiplicity were as follows; s: singlet, d: doublet, t: triplet, q: quartet, m: multiplet, br: broad. Data were presented as follows; chemical shift (multiplicity, integration, coupling constant). The assignment was based on 1H-1H COSY spectra. Mass spectra were obtained on Waters MICRO MASS LCT-premier and the mass analyzer type used for the HRMS measurements was TOF. Optical rotation was measured on a Rudolph Research Analytical Autopol IV automatic polarimeter.

***General procedure A***

A solution of **S1**41 (1.0 equiv.) in CH2Cl2 (0.5 mL) was treated with aldehyde (1.0~1.5 equiv.), AcOH (3 equiv.), and NaBH(OAc)3 (1.5 equiv.) at room temperature for 1 h. Additional NaBH(OAc)3 (1.5 equiv.) was added to the reaction mixture. After stirring for 1 h, the reaction mixture was quenched with *sat. aq.* NaHCO3 (50 μL), and the mixture was partitioned between EtOAc and *sat. aq.* NaHCO3. The organic layer was washed with brine, dried (Na2SO4), filtered and concentrated *in vacuo*. The residue was purified by preparative TLC or silica gel column chromatography to afford products.

*tert*-Butyl 5-*O*-[5-(*tert*-butyloxycarbonylamino)-5-deoxy-2,3-*O*-(3-pentylidene)-β-D-*ribo*-pentofuranosyl]-6-deoxy-6-[4-(dimethoxymethyl)benzylamino]-2,3-*O*-isopropylidene-1-(uracil-1-yl)-β-D-*glycelo*-L-*taro*-heptofuranuronate(***para*-S2**)

According to general procedure A, **S1** (10.0 mg, 14.0 μmol) and 4-(dimethoxymethyl)benzaldehyde (2.6 mg, 14.4 μmol, 1.03 equiv.) were used to afford ***para*-S2** (7.0 mg, 57%) as a white solid after silica gel column chromatography (preparative TLC MeOH/CHCl3 = 4%).

1H NMR (CDCl3, 400 MHz) δ 8.22 (br s, 1H, N*H*-3), 7.35 (s, 4H, Ar), 7.20 (d, 1H, H-6, *J*6,5 = 8.1 Hz), 5.95 (br t, 1H, BocN*H*, *J* = 6.1 Hz), 5.66 (d, 1H, H-5, *J*5,6 = 8.1 Hz), 5.52 (d, 1H, H-1', *J*1',2' = 1.8 Hz), 5.36 (s, 1H, (MeO)2C*H*), 5.07 (dd, 1H, H-2', *J*2',3' = 6.7, *J*2',1' = 1.8 Hz), 5.01 (s, 1H, H-1''), 4.75 (dd, 1H, H-3', *J*3',2' = 6.7, *J*3',4' = 4.5 Hz), 4.63 (dd, 1H, H-4', *J*4',5' = 9.0, *J*4',3' = 4.5 Hz), 4.56-4.51 (m, 2H, H-2'', H-3''), 4.24 (m, 1H, H-4''), 4.07 (br d, 1H, H-5', *J* = 9.0 Hz), 3.94 (d, 1H, ArC*H*2N, *J*gem = 13.2 Hz), 3.59 (d, 1H, ArC*H*2N, *J*gem = 13.2 Hz), 3.34-3.32 (m, 1H, N*H*), 3.32 (s, 6H, OMe×2), 3.29 (d, 1H, H-6', *J* = 2.0 Hz), 3.23-3.16 (m, 1H, H-5''), 3.12-3.04 (m, 1H, H-5''), 1.58 (s, 3H, isopropylidene-C*H*3), 1.52 (s, 9H, *t*Bu), 1.39 (s, 9H, *t*Bu), 1.33 (s, 3H, isopropylidene-C*H*3), 1.56-1.40 (m, 4H, pentylidene-C*H*2×2), 0.77 (t, 6H, pentylidene-C*H*3×2, *J* = 7.2 Hz); 13C NMR (CDCl3, 100 MHz) δ 192.1, 163.3, 156.3, 150.0, 143.8, 143.6, 129.9, 127.1, 116.3, 116.1, 115.1, 114.7, 112.9, 112.6, 103.0, 102.5, 102.4, 96.5, 95.8, 88.2, 87.1, 87.0, 86.7, 86.5, 84.8, 84.6, 82.2, 82.1, 82.0, 81.7, 79.3, 79.1, 52.9, 52.9, 29.8, 29.4, 28.9, 28.5, 28.5, 28.3, 28.2, 28.0, 27.4, 27.4, 25.7, 25.6, 8.6, 7.4, 7.4; ESIMS-HR *m*/*z*: [M+H]+ calcd. for C43H65N4O115 877.4441, found 877.4452; [α]27D +7.12 (*c* 0.70, CHCl3).

*tert*-Butyl 5-*O*-[5-(*tert*-butyloxycarbonylamino)-5-deoxy-2,3-*O*-(3-pentylidene)-β-D-*ribo*-pentofuranosyl]-6-deoxy-6-[3-(dimethoxymethyl)benzylamino]-2,3-*O*-isopropylidene-1-(uracil-1-yl)-β-D-*glycelo*-L-*taro*-heptofuranuronate(***meta*-S2**)

According to general procedure A, **S1** (20.0 mg, 28.1 μmol) and 3-(dimethoxymethyl)benzaldehyde (7.6 mg, 42.1 μmol, 1.5 equiv.) were used to afford ***meta*-S2** (19.4 mg, 79%) as a white solid after silica gel column chromatography (preparative TLC MeOH/CHCl3 = 4%).

1H NMR (CDCl3, 400 MHz) δ 8.32 (br s, 1H, N*H*-3), 7.37-7.27 (m, 4H, Ar), 7.19 (d, 1H, H-6, *J*6,5 = 8.1 Hz), 5.96 (br t, 1H, BocN*H*, *J* = 6.1 Hz), 5.66 (d, 1H, H-5, *J*5,6 = 8.1 Hz), 5.54 (d, 1H, H-1', *J*1',2' = 1.8 Hz), 5.36 (s, 1H, (MeO)2C*H*), 5.05 (dd, 1H, H-2', *J*2',3' = 6.7, *J*2',1' = 1.8 Hz), 5.02 (s, 1H, H-1''), 4.79 (dd, 1H, H-3', *J*3',2' = 6.7, *J*3',4' = 4.5 Hz), 4.59 (dd, 1H, H-4', *J*4',5' = 9.0, *J*4',3' = 4.5 Hz), 4.56-4.50 (m, 2H, H-2'', H-3''), 4.25 (m, 1H, H-4''), 4.07 (br d, 1H, H-5', *J* = 8.1 Hz), 3.92 (d, 1H, ArC*H*2N, *J*gem = 13.1 Hz), 3.60 (d, 1H, ArC*H*2N, *J*gem = 13.1 Hz), 3.35-3.30 (m, 2H, H-6', N*H*), 3.32 (s, 3H, OMe), 3.32 (s, 3H, OMe), 3.23-3.17 (m, 1H, H-5''), 3.11-3.03 (m, 1H, H-5''), 1.57 (s, 3H, isopropylidene-C*H*3), 1.52 (s, 9H, *t*Bu), 1.38 (s, 9H, *t*Bu), 1.34 (s, 3H, isopropylidene-C*H*3), 1.56-1.39 (m, 4H, pentylidene-C*H*2×2), 0.78 (t, 6H, pentylidene-C*H*3×2, *J* = 7.2 Hz); 13C NMR (CDCl3, 100 MHz) δ 172.2, 163.3, 156.3, 150.0, 143.3, 140.1, 138.1, 128.7, 128.3, 126.9, 125.5, 116.2, 114.8, 112.8, 103.3, 102.5, 95.5, 87.6, 87.1, 86.7, 84.6, 82.6, 82.2, 81.8, 81.8, 79.0, 61.5, 52.9, 52.8, 52.4, 43.3, 29.5, 28.9, 28.5, 28.4, 27.3, 25.7, 8.6, 7.4; ESIMS-HR *m*/*z*: [M+H]+ calcd. for C43H65N4O15 877.4441, found 877.4452; [α]21D +5.81 (*c* 0.97, CHCl3).

**MRYp-CHO**

A solution of ***para*-S2** (23.8 mg, 27.1 μmol) in80% *aq.* TFA (2 mL) was stirred at room temperature for 17 h. The reaction mixture was concentrated *in vacuo*. The resulting solid was washed with CH2Cl2 to afford **MRYp-CHO** (22.0 mg, quant.) as a white solid.

1H NMR (D2O, 500 MHz) δ 9.95 (s, 1H, C*H*O), 7.97 (d, 2H, Ar, *J* = 8.0 Hz), 7.66 (d, 2H, Ar, *J* = 8.0 Hz), 7.58 (d, 1H, H-6, *J*6,5 = 8.0 Hz), 5.82 (d, 1H, H-5, *J*5,6 = 8.0 Hz), 5.66 (d, 1H, H-1', *J*1',2' = 4.6 Hz), 5.19 (d, 1H, H-1'', *J*1'',2'' = 1.7 Hz), 4.63 (d, 1H, H-5', *J* = 2.9 Hz), 4.58 (d, 1H, Ar-C*H*2-N, *J*gem = 13.2 Hz), 4.47 (t, 1H, H-2', *J* = 4.4 Hz), 4.36 (d, 1H, Ar-C*H*2-N, *J*gem = 13.2 Hz), 4.32-4.27 (m, 2H, H-3', H-4'), 4.18-4.14 (m, 3H, H-2'', H-3'', H-4''), 4.10 (s, 1H, H-6'), 3.34 (dd, 1H, H-5'', *J*gem = 12.9, *J*5'',4'' = 2.9 Hz), 3.22 (dd, 1H, H-5'', *J*gem = 12.9, *J*5'',4'' = 10.0 Hz); 13C NMR (D2O, 1% DMSO-*d*6 as an internalized standard, 100 MHz) δ 197.0, 171.8, 167.4, 164.5 (q, *J*CF = 36.6 Hz), 152.9, 144.9, 139.0, 138.1, 132.5, 132.2, 117.9 (q, *J*CF = 295.7 Hz), 110.7, 104.1, 93.8, 87.3, 80.8, 77.4, 76.3, 73.3, 73.1, 71.1, 65.1, 53.2, 43.9; ESIMS-HR *m*/*z*: [M+H]+ calcd. for C24H31N4O12 567.1933, found 567.1917; [α]20D +18.01 (*c* 0.81, H2O).

**MRYm-CHO**

A solution of ***meta*-S2** (26.4 mg, 30.1 μmol) in 80% *aq.* TFA (2 mL) was stirred at room temperature for 17 h. The reaction mixture was concentrated *in vacuo*. The resulting solid was washed with CH2Cl2 to afford **MRYm-CHO** (21.8 mg, 91%) as a white solid.

1H NMR (D2O, 500 MHz) δ 9.95 (s, 1H, C*H*O), 8.02 (d, 1H, H-6''', *J* = 7.5 Hz), 7.98 (s, 1H, H-2'''), 7.80 (d, 2H, H-4''', *J* = 8.0 Hz), 7.69 (t, 1H, H-5''', *J* = 7.5 Hz), 7.60 (d, 1H, H-6, *J*6,5 = 8.0 Hz), 5.82 (d, 1H, H-5, *J*5,6 = 8.0 Hz), 5.67 (d, 1H, H-1', *J*1',2' = 4.6 Hz), 5.20 (d, 1H, H-1'', *J*1'',2'' = 1.7 Hz), 4.63 (d, 1H, H-5', *J* = 2.9 Hz), 4.59 (d, 1H, Ar-C*H*2-N, *J*gem = 13.2 Hz), 4.45 (t, 1H, H-2', *J* = 4.6 Hz), 4.38 (d, 1H, Ar-C*H*2-N, *J*gem = 13.2 Hz), 4.30-4.26 (m, 2H, H-3', H-4'), 4.19-4.13 (m, 3H, H-2'', H-3'', H-4''), 4.09 (s, 1H, H-6'), 3.35 (dd, 1H, H-5'', *J*gem = 13.4, *J*5'',4'' = 2.9 Hz), 3.22 (dd, 1H, H-5'', *J*gem = 13.4, *J*5'',4'' = 10.0 Hz); 13C NMR (D2O, 1% DMSO-*d*6 as an internalized standard, 100 MHz) δ 197.0, 172.0, 167.5, 164.5 (q, *J*CF = 36.6 Hz), 152.8, 144.7, 138.4, 138.0, 133.6, 133.3, 132.3, 131.8, 118.0 (q, *J*CF = 296.2 Hz), 110.6, 104.0, 93.7, 87.1, 80.8, 77.4, 76.3, 73.4, 73.3, 72.3, 71.0, 65.0, 52.9, 43.9; ESIMS-HR *m*/*z*: [M+H]+ calcd. for C24H31N4O12 567.1933, found 567.1917; [α]20D +9.21 (*c* 0.82, H2O).

1-{11*S*-6,10-Dideoxy-11-*O*-[2-acetamido-2-deoxy-4,6-*O*-isopropylidene-3-*O*-(methoxymethyl)-α-D-*gluco*-hexopyranosyl]-2,3:8,9-di-*O*-isopropylidene-5-*O­*-(methoxymethyl)-10-phthalimido-L-*galacto*-β-D-*allo*-undecodialdo-1,4-furanose-11,7-pyranos-1-yl}uracil(**S4**)

A solution of **S3**42 (60.0 mg, 56.2 μmol) and Pd black (24 mg) in 0.1% HCO2H/MeOH (4 mL) was stirred under H2 atmosphere for 6 h. The insoluble solid was filtered off through a Celite pad and washed with MeOH. The filtrate was concentrated *in vacuo*, and the residue was purified by silica gel column chromatography (ϕ1.1×12 cm; CHCl3/MeOH = 2% → 5%) to afford **S4** (39.8 mg, 75%) as a white solid and mono-isop-deprotected mixture (12.7 mg, 25%) as a white solid.

1H NMR (CDCl3, 500 MHz) δ 8.92 (br s, 1H, N*H*-3), 7.86 (br s, 2H, Phth), 7.75 (m, 2H, Phth), 7.24 (d, 1H, H-6, *J*6,5 = 8.0 Hz), 5.72 (dd, 1H, H-5, *J*5,6 = 8.0, *J*5,NH-3 = 2.3 Hz), 5.57 (d, 1H, H-1', *J*1',2' = 1.7 Hz), 5.53 (d, 1H, N*H*-2'', *J* = 8.6 Hz), 5.16 (m, 2H, H-3', H-11'), 4.99 (dd, 1H, H-2', *J*2',3' = 6.9, *J*2',1' = 1.7 Hz), 4.94 (d, 1H, H-1'', *J*1'',2'' = 3.4 Hz), 4.80 (d, 1H, O-C*H*2-OMe, *J*gem = 6.3 Hz), 4.75 (dd, 1H, H-9', *J*9',10' = 9.2, *J*9',8' = 5.2 Hz), 4.72 (d, 1H, O-C*H*2-OMe, *J*gem = 6.3 Hz), 4.69 (d, 1H, O-C*H*2-OMe, *J*gem = 6.3 Hz), 4.54 (d, 1H, O-C*H*2-OMe, *J*gem = 6.3 Hz), 4.33 (t, 1H, H-10', *J* = 8.9 Hz), 4.26 (dd, 1H, H-6'', *J*gem = 10.9, *J*6'',5'' = 5.2 Hz), 4.12 (br d, 1H, H-7', *J* = 10.3 Hz), 4.05 (dd, 1H, H-8', *J*8',9' = 5.2, *J*8',7' = 2.3 Hz), 4.00-3.89 (m, 4H, H-4', H-5', H-2'', H-5''), 3.71 (t, 1H, H-6'', *J* = 10.6 Hz), 3.66-3.60 (m, 2H, H-3'', H-4''), 3.45 (s, 3H, OMe), 3.24 (s, 3H, OMe), 2.29 (m, 1H, H-6'), 1.68 (obscured, H-6'), 1.66, 1.57, 1.50, 1.48, 1.35, 1.31, 1.18 (each s, 3H×7, isopropylidene-C*H*3×6 or Ac); 13C NMR (CDCl3, 100 MHz) δ 170.1, 169.6-167.7 (broad), 163.0, 150.2, 142.4, 134.6, 131.7, 123.8, 114.4, 110.7, 103.0, 100.6, 100.2, 99.3, 98.3, 97.7, 94.7, 90.9, 84.8, 81.6, 75.8, 75.8, 75.3, 74.6, 74.0, 69.3, 64.7, 62.1, 56.3, 55.6, 55.5, 52.8, 35.5, 29.3, 28.1, 27.3, 26.5, 25.4, 22.2, 19.3; ESIMS-HR *m*/*z*: [M+H]+ calcd. for C44H59N4O19 947.3768, found 947.3758; [α]22D +70.30 (*c* 10.1, CHCl3).

*Re-protection of by-product*

A solution of **mono-desisopropylidene** (20.7 mg, 22.8 mg) and 2,2-dimethoxypropane (27.9 μL, 228 μmol, 10 equiv.) in acetone (0.8 mL) was treated with BF3·OEt2 (0.286 μL, 2.28 μmol, 0.1 equiv.) at 0 °C for 10 min. The reaction was quenched with *sat. aq.* NaHCO3 (1.5 mL), and the resulting mixture was extracted with EtOAc. The organic layer was washed with brine (1.5 mL), dried (Na2SO4), filtered and concentrated *in vacuo*. The residue was purified by silica gel column chromatography (ϕ0.7×8 cm; CHCl3/MeOH = 1% → 2%) to afford **S6** (17.0 mg, 79%) as a white solid.

***General procedure B (acylation)***

A solution of **S6** (1.0 equiv.) in EtOH (1 mL) was treated with ethylenediamine (10 equiv.), and the mixture was heated at 80 °C for 5-6 h. The reaction mixture was cooled and concentrated *in vacuo* (co-evaporated with toluene×3). The residue was purified by short silica gel column (treated with 0.1% Et3N; CHCl3/MeOH = 7%) to afford the crude amine. A solution of the amine in CH2Cl2 (0.5 mL) was treated sequentially with Et3N (3.0 equiv.), carboxylic acid (2.0 equiv.), HOAt (1.0 equiv.) and EDCI (2.2 equiv.) at room temperature for 2-3 h. Methanol (0.5 mL) was added to the reaction mixture, which was stirred for 1-3 h. The mixture was concentrated *in vacuo* and co-evaporated with toluene. The residue was purified by silica gel column chromatography to afford amide products

1-{11*S*-6,10-Dideoxy-11-*O*-[2-acetamido-2-deoxy-4,6-*O*-isopropylidene-3-*O*-(methoxymethyl)-α-D-*gluco*-hexopyranosyl]-2,3:8,9-di-*O*-isopropylidene-5-*O*­-(methoxymethyl)-10-(4-dimethoxymethylbenzamido)-L-*galacto*-β-D-*allo*-undecodialdo-1,4-furanose-11,7-pyranos-1-yl}uracil(***para*-S5**)

According to general procedure B, **S4** (25.0 mg, 26.4 μmol) and 4-dimethoxymehtylbenzoic acid (8.9 mg, 52.8 μmol) were used to afford ***para*-S5** (21.6 mg, 82% over 2 steps) as a white solid after silica gel column chromatography (ϕ0.7×7.5 cm, hexane/EtOAc = 1/2 → CHCl3/MeOH = 0% → 2% → 3%).

1H NMR (CDCl3, 500 MHz) δ 9.05 (br s, 1H, N*H*-3), 7.82 (d, 2H, H-2''', H-6''', *J* = 8.0 Hz), 7.53 (d, 2H, H-3''', H-5''', *J* = 8.0 Hz), 7.25 (d, 1H, H-6, *J*6,5 = 8.0 Hz), 6.64 (d, 1H, N*H*-10', *J* = 6.9 Hz), 5.92 (d, 1H, N*H*-2'', *J* = 9.2 Hz), 5.72 (d, 1H, H-5, *J*5,6 = 8.0 Hz), 5.58 (d, 1H, H-1', *J*1',2' = 1.7 Hz), 5.43 (s, 1H, C*H*(OMe)2), 5.15 (dd, 1H, H-3', *J*3',2' = 6.3, *J*3',4' = 3.4 Hz), 5.03-5.00 (m, 2H, H-11', H-1''), 4.98 (dd, 1H, H-2', *J*2',3' = 6.3, *J*2',1' = 1.7 Hz), 4.79 (d, 1H, O-C*H*2-OMe, *J*gem = 6.8 Hz), 4.76 (d, 1H, O-C*H*2-OMe, *J*gem = 6.8 Hz), 4.69 (d, 1H, O-C*H*2-OMe, *J*gem = 6.8 Hz), 4.55 (d, 1H, O-C*H*2-OMe, *J*gem = 6.8 Hz), 4.49 (dd, 1H, H-9', *J*9',10' = 8.6, *J*9',8' = 5.2 Hz), 4.26 (dd, 1H, H-6'', *J*gem = 10.5, *J*6'',5'' = 5.2 Hz), 4.12 (td, 1H, H-2'', *J* = 9.5, *J*2'',1'' = 3.4 Hz), 4.06-3.93 (m, 5H, H-4', H-5', H-7', H-8', H-5''), 3.75-3.65 (m, 4H, H-10', H-3'', H-4'', H-6''), 3.43 (s, 3H, OMe), 3.29 (s, 3H, OMe), 3.28 (s, 3H, OMe), 3.25 (s, 3H, OMe), 2.26-2.22 (m, 1H, H-6'), 1.66-1.62 (m, 1H, H-6'), 1.60, 1.56, 1.50, 1.49, 1.35, 1.34, 1.21 (each s, 3H×7, Ac and isopropylidene-C*H*3×6); 13C NMR (CDCl3, 100 MHz) δ 170.4, 167.8, 163.5, 150.1, 142.5, 142.3, 133.9, 127.3, 114.6, 110.3, 102.7, 102.0, 101.7, 101.1, 100.1, 98.3, 97.4, 94.2, 90.6, 84.7, 81.2, 75.8, 75.7, 75.7, 75.2, 74.8, 69.1, 64.7, 62.2, 57.4, 56.2, 55.5, 52.6, 52.5, 35.3, 29.3, 28.5, 27.3, 26.4, 25.4, 22.4, 19.3; ESIMS-HR *m*/*z*: [M+H]+ calcd. for C46H67N4O20 995.4343, found 995.4368; [α]16D +57.33 (*c* 0.98, CHCl3).

1-{11*S*-6,10-Dideoxy-11-*O*-[2-acetamido-2-deoxy-4,6-*O*-isopropylidene-3-*O*-(methoxymethyl)-α-D-*gluco*-hexopyranosyl]-2,3:8,9-di-*O*-isopropylidene-5-*O*­-(methoxymethyl)-10-(3-dimethoxymethylbenzamido)-L-*galacto*-β-D-*allo*-undecodialdo-1,4-furanose-11,7-pyranos-1-yl}uracil(***meta*-S5**)

According to general procedure B, **S4** (25.0 mg, 26.4 μmol) and 3-dimethoxymehtylbenzoic acid (8.9 mg, 52.8 μmol) were used to afford ***meta*-S5** (20.5 mg, 78% over 2 steps) as a white solid after silica gel column chromatography (ϕ0.7×7 cm, hexane/EtOAc = 1/2 → CHCl3/MeOH = 0% → 2% → 3%).

1H NMR (CDCl3, 500 MHz) δ 9.05 (br s, 1H, N*H*-3), 7.87 (s, 1H, H-2'''), 7.84 (d, 1H, H-6''', *J* = 7.5 Hz), 7.60 (d, 1H, H-4''', *J* = 7.5 Hz), 7.46 (t, 1H, H-5''', *J* = 7.5 Hz), 7.25 (d, 1H, H-6, *J*6,5 = 8.0 Hz), 6.68 (d, 1H, N*H*-10', *J* = 7.5 Hz), 5.92 (d, 1H, N*H*-2'', *J* = 9.2 Hz), 5.72 (d, 1H, H-5, *J*5,6 = 8.0 Hz), 5.58 (d, 1H, H-1', *J*1',2' = 1.7 Hz), 5.41 (s, 1H, C*H*(OMe)2), 5.16 (dd, 1H, H-3', *J*3',2' = 6.3, *J*3',4' = 3.4 Hz), 5.01-5.00 (m, 2H, H-11', H-1''), 4.98 (dd, 1H, H-2', *J*2',3' = 6.3, *J*2',1' = 1.7 Hz), 4.79 (d, 1H, O-C*H*2-OMe, *J*gem = 6.3 Hz), 4.75 (d, 1H, O-C*H*2-OMe, *J*gem = 6.9 Hz), 4.69 (d, 1H, O-C*H*2-OMe, *J*gem = 6.3 Hz), 4.55 (d, 1H, O-C*H*2-OMe, *J*gem = 6.9 Hz), 4.49 (dd, 1H, H-9', *J*9',10' = 8.6, *J*9',8' = 5.2 Hz), 4.26 (dd, 1H, H-6'', *J*gem = 10.9, *J*6'',5'' = 5.2 Hz), 4.12 (td, 1H, H-2'', *J* = 9.5, *J*2'',1'' = 3.4 Hz), 4.06-3.93 (m, 5H, H-4', H-5', H-7', H-8', H-5''), 3.75-3.67 (m, 4H, H-10', H-3'', H-4'', H-6''), 3.44 (s, 3H, OMe), 3.32 (s, 6H, OMe×2), 3.25 (s, 3H, OMe), 2.27-2.22 (m, 1H, H-6'), 1.66-1.62 (m, 1H, H-6'), 1.61, 1.56, 1.50, 1.49, 1.35, 1.34, 1.23 (each s, 3H×7, Ac and isopropylidene-C*H*3×6); 13C NMR (CDCl3, 100 MHz) δ 170.4, 167.9, 163.4, 150.1, 142.4, 139.0, 133.9, 130.6, 128.9, 127.8, 125.3, 114.6, 110.3, 102.8, 102.5, 101.8, 101.1, 100.1, 98.3, 97.4, 94.0, 90.4, 84.6, 81.2, 75.9, 75.7, 75.2, 74.8, 69.1, 64.7, 62.2, 57.3, 56.2, 55.5, 52.9, 52.8, 52.5, 35.3, 29.3, 28.5, 27.3, 26.4, 25.4, 22.4, 19.3; ESIMS-HR *m*/*z*: [M+H]+ calcd. for C46H67N4O20 995.4343, found 995.4368; [α]17D +60.16 (*c* 0.91, CHCl3).

***General procedure C (deprotection)***

A solution of protected analogue (1.0 equiv.) in CH2Cl2 (~50 mM) was treated with 80% *aq.* TFA (same volume as CH2Cl2) at room temperature for 3 h. The reaction mixture was concentrated *in vacuo*, the resulting solid was washed with hexane and EtOAc (×3) to afford products.

**TUNp-CHO**

According to general procedure C, ***para-*S5** (20.0 mg, 20.1 μmol) was used to afford **TUNp-CHO** (15.2 mg, quant.) as a white solid.

1H NMR (D2O, 400 MHz) δ 10.06 (s, 1H, C*H*O), 8.06 (d, 2H, H-3''', H-5''', *J* = 8.2 Hz), 7.92 (d, 2H, H-2''', H-6''', *J* = 8.2 Hz), 7.85 (d, 1H, H-6, *J*6,5 = 8.2 Hz), 5.92 (d, 1H, H-5, *J*5,6 = 8.2 Hz), 5.91 (d, 1H, H-1', *J*1',2' = 5.4 Hz), 5.14 (d, 1H, H-1'', *J*1'',2'' = 3.6 Hz), 4.88 (d, 1H, H-11', *J*11',10' = 8.2 Hz), 4.34 (t, 1H, H-2', *J* = 5.4 Hz), 4.31 (dd, 1H, H-3', *J*3',2' = 5.4, *J*3',4'  = 3.6 Hz), 4.24 (dd, 1H, H-10', *J*10',9' = 10.0, *J*10',11' = 8.2 Hz), 4.04-4.01 (m, 2H, H-4', H-5'), 3.97-3.90 (m, 3H, H-7', H-9', H-5''), 3.87-3.74 (m, 5H, H-8', H-2'', H-3'', H-6'', H-6''), 3.51 (dd, 1H, H-4'', *J* = 10.0, *J* = 9.1 Hz), 2.07 (m, 1H, H-6'), 1.68 (m, 1H, H-6'), 1.27 (s, 3H, Ac); 13C NMR (D2O, 100 MHz: 1% DMSO-*d*6 as internal standard) δ 197.1, 175.5, 171.8, 167.7, 153.4, 143.5, 140.6, 139.9, 132.0, 129.6, 104.2, 101.8, 100.5, 90.2, 88.9, 75.1, 74.3, 73.1, 72.4, 72.0, 71.7, 71.3, 70.7, 68.7, 62.1, 55.1, 55.0, 35.2, 23.0; ESIMS-HR *m*/*z*: [M+H]+ calcd. for C31H41N4O17 741.2461, found 741.2448; [α]21D +46.90 (*c* 0.96, H2O).

**TUNm-CHO**

According to general procedure C, ***meta*-S5** (19.5 mg, 19.6 μmol) was used to afford **TUNm-CHO** (15.0 mg, quant., aldehyde form >95%) as a white solid.

1H NMR (D2O, 400 MHz) δ 10.0 (s, 1H, C*H*O), 8.26 (s, 1H, H-2'''), 8.17 (d, 1H, H-4''', *J* = 7.7 Hz), 8.06 (d, 1H, H-6''', *J* = 7.7 Hz), 7.85 (d, 1H, H-6, *J*6,5 = 8.2 Hz), 7.75 (t, 1H, H-5''', *J* = 7.7 Hz), 5.92 (d, 1H, H-5, *J*5,6 = 8.2 Hz), 5.91 (d, 1H, H-1', *J*1',2' = 5.4 Hz), 5.14 (d, 1H, H-1'', *J*1'',2'' = 3.2 Hz), 4.88 (d, 1H, H-11', *J*11',10' = 8.6 Hz), 4.34 (t, 1H, H-2', *J* = 5.4 Hz), 4.30 (dd, 1H, H-3', *J*3',2' = 5.4, *J*3',4' = 3.2 Hz), 4.25 (dd, 1H, H-10', *J*10', 9' = 10.9, *J*10',11' = 8.6 Hz), 4.04-4.00 (m, 2H, H-4', H-5'), 3.97-3.91 (m, 3H, H-7', H-9', H-5''), 3.87-3.74 (m, 5H, H-8', H-2'', H-3'', H-6'', H-6''), 3.50 (dd, 1H, H-4'', *J* = 10.0, *J* = 9.1 Hz), 2.06 (br t, 1H, H-6', *J* = 12.5 Hz), 1.68 (br t, 1H, H-6', *J* = 12.5 Hz), 1.24 (s, 3H, Ac); 13C NMR (D2O, 100 MHz: 1% DMSO-*d*6 as internal standard) δ 196.8, 175.4, 171.6, 167.7, 153.4, 143.5, 137.7, 136.0, 135.4, 135.1, 131.6, 129.9, 104.2, 101.9, 100.5, 90.2, 88.9, 75.1, 74.3, 73.1, 72.5, 71.9, 71.7, 71.3, 70.7, 68.7, 62.1, 55.1, 55.0, 35.2, 22.9; ESIMS-HR *m*/*z*: [M+H]+ calcd. for C31H41N4O17 741.2461, found 741.2448; [α]21D +41.05 (*c* 0.57, H2O).

Compound ***para*-S7**

A solution of **S6**43 (20.0 mg, 16.8 µmol), *p*-formylbenzoic acid (6.3 mg, 41.7 µmol), and *i*Pr2NEt (18.7 µL, 110.7 µmol) in DMF (400 µL) was treated with HATU (15.3 mg, 40.3 µmol) at room temperature for 1 h. The mixture was partitioned between EtOAc and 1 M *aq*. HCl. The organic layer was washed with 1 M *aq*. HCl, *sat*. *aq*. NaHCO3 and brine, dried (Na2SO4), filtered and concentrated *in* *vacuo*. The residue was purified by preparative TLC (CHCl3/MeOH = 97/3) to afford ***para*-S7** (10.8 mg, 8.6 µmol, 51%) as a white solid.

1H NMR (DMSO-*d*6, 400 MHz) δ 11.55 (s, 1H, H-N3-uridine), 10.07 (s, 1H, CHO), 9.42 (d, 1H, NH-5'-uridine, *J*NH-5'-uridine, H-5'-uridine = 10.4 Hz), 8.97 (d, 1H, DABA-NH, *J*DABA-NH, H-α-DABA = 9.2 Hz), 8.07 (d, 2H, H-2-benzene, H-6-benzene, *J*H-2-benzene, H-3-benzene = 8.2 Hz, *J*H-6-benzene, H-5-benzene = 8.2 Hz), 7.98 (d, 2H, H-3-benzene, H-5-benzene, *J*H-3-benzene, H-2-benzene = 8.2 Hz, *J*H-5-benzene, H-6-benzene = 8.2 Hz), 7.87 (d, 1H, NH-*m*Tyr, *J*NH-*m*Tyr, H-α-*m*Tyr = 8.0 Hz), 7.65-7.24 (m, 9H, H-Fmoc, H-6-uridine), 7.18-6.69 (m, 4H, H-2-*m*Tyr, H-4-*m*Tyr, H-5-*m*Tyr, H-6-*m*Tyr), 6.20-6.17 (m, 2H, H-1'-uridine, H-5'-uridine), 5.48 (dd, 1H, H-5-uridine, *J*H-5-uridine, H-N3-uridine = 2.2 Hz, *J*H-5-uridine, H-6-uridine = 8.4 Hz), 5.22 (dd, 1H, H-β-DABA, *J*H-β-DABA, H-α-DABA = 10.4 Hz, *J*H-β-DABA, H-γ-DABA = 7.0 Hz), 4.76 (dd, 1H, H-α-DABA, *J*H-α-DABA, DABA-NH = 9.2 Hz, *J*H-α-DABA, H-β-DABA = 10.4 Hz), 4.52-4.09 (m, 6H, H-Fmoc, H-α-*m*Tyr, H-2'-uridine, H-3'-uridine), 3.07 (s, 3H, NCH3), 2.78-2.65 (m, 2H, H-β-*m*Tyr), 1.24-1.13(m, 3H, Si[CH(CH3)2]3), 1.05-1.00 (m, 21H, Si[CH(CH3)2]3, H-γ-DABA), 0.85 (s, 9H, SiC(CH3)3), 0.77 (s, 9H, SiC(CH3)3), 0.05 (s, 3H, *t*BuSi(CH3)2), 0.02 (s, 3H, *t*BuSi(CH3)2), -0.03 (s, 3H, *t*BuSi(CH3)2), -0.14 (s, 3H, *t*BuSi(CH3)2); 13C NMR (DMSO-*d*6, 100 MHz) δ 192.8, 172.4, 167.3, 165.5, 162.6, 156.0, 155.3, 150.8, 143.9, 143.6, 140.8, 140.3, 140.0, 138.6, 138.1, 129.4, 128.2, 127.6, 127.1, 125.5, 125.3, 121.9, 120.7, 120.1, 117.6, 102.7, 100.4, 87.1, 79.2, 73.7, 70.8, 65.6, 56.8, 53.2, 48.6, 46.6, 36.3, 29.3, 25.7, 25.5, 17.8, 17.5, 14.8, 12.0, -4.2, -4.7, -4.8, -5.4; ESIMS-HR *m*/*z*: [M+H]+ calcd. for C67H93N6O12Si3 1257.6154, found 1257.6155; [α]18D 68.50 (*c* 1.08, CHCl3).

Compound ***meta*-S7**

A solution of **S6**43 (40.0 mg, 33.6 µmol), *m*-formylbenzoic acid (12.6 mg, 83.9 µmol) and *i*Pr2NEt (37.4 µL, 221.5 µmol) in DMF (400 µL) was treated with HATU (29.3 mg, 77.2 µmol) at room temperature for 1 h. The mixture was partitioned between EtOAc and 1 M *aq*. HCl. The organic layer was washed with 1 M *aq*. HCl, *sat*. *aq*. NaHCO3 and brine, dried (Na2SO4), filtered and concentrated *in* *vacuo*. The residue was purified by preparative TLC (CHCl3/MeOH = 97/3) to afford ***meta*-S7** (23.7 mg, 18.8 µmol, 56%) as a white solid.

1H NMR (DMSO-*d*6, 400 MHz) δ 11.54 (s, 1H, H-N3-uridine), 10.06 (s, 1H, CHO), 9.45 (d, 1H, NH-5'-uridine, *J*NH-5'-uridine, H-5'-uridine = 10.3 Hz), 9.01 (d, 1H, DABA-NH, *J*DABA-NH, H-α-DABA = 9.2 Hz), 8.45 (s, 1H, H-2-benzene), 8.20 (d, 1H, H-4-benzene, *J*H-4-benzene, H-5-benzene = 7.6 Hz), 8.10 (d, 1H, H-6-benzene, *J*H-6-benzene, H-5-benzene = 7.6 Hz), 7.86 (m, 1H, NH-*m*Tyr), 7.71 (dd, 1H, H-5-benzene, *J*H-5-benzene, H-4-benzene = 7.6 Hz, *J*H-5-benzene, H-6-benzene = 7.6 Hz), 7.66-7.24 (m, 9H, H-Fmoc, H-6-uridine), 7.18-6.68 (m, 4H, H-2-mTyr, H-4-*m*Tyr, H-5-*m*Tyr, H-6-*m*Tyr), 6.21-6.19 (m, 2H, H-1'-uridine, H-5'-uridine), 5.41 (dd, 1H, H-5-uridine, *J*H-5-uridine, H-6-uridine = 8.1 Hz), 5.24 (dd, 1H, H-β-DABA, *J*H-β-DABA, H-α-DABA = 10.3 Hz, *J*H-β-DABA, H-γ-DABA = 6.7 Hz), 4.78 (dd, 1H, H-α-DABA, *J*H-α-DABA, DABA-NH = 9.2 Hz, *J*H-α-DABA, H-β-DABA = 10.3 Hz), 4.54-4.09 (m, 6H, H-Fmoc, H-α-*m*Tyr, H-2'-uridine, H-3'-uridine), 3.08 (s, 3H, NCH3), 2.78-2.66 (m, 2H, H-β-*m*Tyr), 1.26-1.13 (m, 3H, Si[CH(CH3)2]3), 1.05-1.00 (m, 21H, Si[CH(CH3)2]3, H-γ-DABA), 0.81 (s, 9H, SiC(CH3)3), 0.77 (s, 9H, SiC(CH3)3), 0.05 (s, 3H, *t*BuSi(CH3)2), 0.02 (s, 3H, *t*BuSi(CH3)2), -0.04 (s, 3H, *t*BuSi(CH3)2), -0.15 (s, 3H, *t*BuSi(CH3)2); 13C NMR (DMSO-*d*6, 100 MHz) δ 192.7, 172.4, 167.4, 165.1, 162.5, 156.0, 155.3, 150.8, 143.8, 143.6, 140.7, 140.2, 140.0, 136.3, 134.4, 133.3, 133.0, 129.4, 129.3, 127.6, 127.1, 125.5, 125.3, 121.9, 120.7, 120.1, 117.6, 102.7, 100.4, 86.9, 79.2, 73.8, 70.8, 65.6, 56.8, 53.2, 48.6, 46.6, 36.4, 29.3, 25.7, 25.5, 17.8, 17.5, 14.8, 12.0, -4.2, -4.7, -4.8, -5.4; ESIMS-HR *m*/*z*: [M+H]+ calcd. for C67H93N6O12Si3 1257.6154, found 1257.6155; [α]17D 82.05 (*c* 1.10, CHCl3).

**MRDp-CHO**

A solution of ***para*-S7** (10.8 mg, 8.6 µmol) in MeCN (400 µL) was treated with 3HF·NEt3 (55.9 µL, 343.4 µmol) at room temperature for 3 days. Trimethylsilanol (89.0 µL, 796.7 µmol) was added to the reaction mixture, which was further stirred for 1 h. The mixture was concentrated *in* *vacuo*, and the residue was treated with 20% Et2NH/MeCN (2.0 mL) at room temperature for 1 h. The mixture was concentrated *in* *vacuo*, and the residue was triturated with Et2O. The solvent was removed by decantation, and the resulting precipitate was purified by ODS column chromatography (MeCN/H2O = 0 to 30%, containing 0.1% TFA) to afford **MRDp-CHO** (5.6 mg, 7.3 µmol, 85%) as a white solid.

1H NMR (DMSO-*d*6, 400 MHz, 1:1 mixture of rotamers, selected data for the major rotamer) δ 11.51 (s, 1H, H-N3-uridine), 10.07 (s, 1H, CHO), 9.69 (d, 1H, NH-5'-uridine, *J*NH-5'-uridine, H-5'-uridine = 9.8 Hz), 9.60 (s, 1H, OH-*m*Tyr), 9.09-9.03 (m, 3H, DABA-NH, NH-*m*Tyr), 8.05-7.97 (m, 4H, H-2-benzene, H-3-benzene, H-5-benzene, H-6-benzene), 7.20-7.12 (m, 1H, H-5-*m*Tyr), 6.85 (d, 1H, H-6-uridine, *J*H-6-uridine, H-5-uridine = 8.2 Hz), 6.74-6.63 (m, 3H, H-2-*m*Tyr, H-4-*m*Tyr, H-6-*m*Tyr), 6.15-6.08 (m, 2H, H-1'-uridine, H-5'-uridine), 5.69-5.65 (m, 1H, OH-uridine), 5.50-5.46 (m, 1H, OH-uridine), 5.41 (d, 1H, H-5-uridine, *J*H-5-uridine, H-6-uridine = 8.2 Hz), 5.20-5.15 (m, 1H, H-β-DABA), 4.79 (d, 1H, H-α-DABA, *J*H-α-DABA, H-β-DABA = 10.4 Hz), 4.42-4.33 (m, 2H, H-α-*m*Tyr, H-2'-uridine), 3.93-3.90 (m, 1H, H-3'-uridine), 3.03 (s, 3H, NCH3), 2.58-2.46 (m, 2H, H-β-*m*Tyr), 1.19 (d, 3H, H-γ-DABA, *J*H-γ-DABA, H-β-DABA = 6.8Hz); 13C NMR (D2O, 100 MHz) δ 195.9, 170.6, 169.7, 168.9, 166.0, 164.0, 163.7, 157.5, 151.2, 144.3, 141.8, 137.0, 136.2, 134.4, 132.1, 131.0, 128.7, 121.9 , 118.9, 116.7, 116.4, 115.9, 103.5, 100.1, 73.0, 70.6, 69.2, 57.0, 53.3, 37.0, 30.5, 14.7; ESIMS-HR *m*/*z*: [M+H]+ calcd. for C31H35N6O10 651.2409, found 651.2386; [α]19D 30.10 (*c* 0.80, MeOH).

**MRDm-CHO**

A solution of ***meta*-S7** (34.7 mg, 27.6 µmol) in MeCN (300 µL) was treated with 3HF·NEt3 (180.0 µL, 1.1 mmol) at room temperature for 3 days. Trimethylsilanol (583.0 µL, 5.3 mmol) was added to the reaction mixture, which was further stirred for 4 h. The mixture was concentrated *in* *vacuo*, and the residue was treated with 20% Et2NH/MeCN (2.0 mL) at room temperature for 1 h. The mixture was concentrated *in* *vacuo*, and the residue was triturated with Et2O. The solvent was removed by decantation, and the resulting precipitate was purified by ODS column chromatography (MeCN/H2O = 0 to 30%, containing 0.1% TFA) to afford **MRDm-CHO** (16.7 mg, 21.8 µmol, 79%) as a white solid.

1H NMR (DMSO-*d*6, 400 MHz, 1:1 mixture of rotamers, selected data for the major rotamer) δ 11.51 (s, 1H, H-N3-uridine), 10.07 (s, 1H, CHO), 9.69 (d, 1H, NH-5'-uridine), 9.60 (s, 1H, OH-*m*Tyr), 9.16-9.12 (m, 3H, DABA-NH, NH-*m*Tyr), 8.43 (d, 1H, H-6-benzene), 8.21-8.10 (m, 2H, H-2-benzene, H-3-benzene), 7.75-7.69 (m, 1H, H-5-benzene), 7.19-7.10 (m, 1H, H-5-*m*Tyr), 6.84 (d, 1H, H-6-uridine, *J*H-6-uridine, H-5-uridine = 8.1 Hz), 6.77-6.65 (m, 3H, H-2-*m*Tyr, H-4-*m*Tyr, H-6-*m*Tyr), 6.20-6.07 (m, 2H, H-1'-uridine, H-5'-uridine), 5.74-5.72 (m, 1H, OH-uridine), 5.53 (m, 1H, OH-uridine), 5.40 (d, 1H, H-5-uridine, *J*H-5-uridine, H-6-uridine = 8.1 Hz), 5.21-5.19 (m, 1H, H-β-DABA), 4.83 (d, 1H, H-α-DABA, *J*H-α-DABA, H-β-DABA = 9.2 Hz), 4.47-4.34 (m, 2H, H-α-*m*Tyr, H-2'-uridine), 3.91 (m, 1H, H-3'-uridine), 3.04 (s, 3H, NCH3), 2.58-2.46 (m, 2H, H-β-*m*Tyr), 1.17 (d, 3H, H-γ-DABA, *J*H-γ-DABA, H-β-DABA = 6.8Hz); 13C NMR (D2O, 100 MHz) δ 195.5, 170.6, 169.7, 168.9, 166.0, 164.0, 163.7, 157.5, 151.2, 144.3, 141.8, 137.0, 136.2, 134.4, 132.1, 131.0, 128.7, 121.9, 118.9, 116.7, 116.4, 115.9, 103.5, 100.1, 73.1, 70.6, 69.0, 57.3, 53.1, 50.8, 49.9, 37.0, 30.6, 14.7; ESIMS-HR *m*/*z*: [M+H]+ calcd. for C31H35N6O10 651.2409, found 651.2386; [α]20D 27.44 (*c* 0.83, MeOH).

Compound **S9**

A mixture of **S8**44 (2.32 g, 3.27 mmol), acetaldoxime (3.86 g, 65.4 mmol) and indium (III) chloride anhydrous (717 mg, 3.27 mmol) in toluene (5 mL) was stirred at room temperature for 18 h. The mixture was concentrated *in vacuo*. The residue was purified by silica gel chromatography (50 g, MeOH/CHCl3 = 3%) to afford **S9** (1.99 g, 2.73 mmol, 84%) as a white amorphous solid.

1H NMR (CDCl3, 400 MHz) δ 8.08 (br s, 1H, N*H*-3), 7.68 (d, 1H, H-6, *J*6,5 = 8.0 Hz), 6.67 (br s, 1H, CON*H*2-5'), 5.96 (d, 1H, H-1', *J*1',2' = 3.2 Hz), 5.71 (dd, 1H, H-5, *J*5,6 = 8.0 Hz), 5.61 (br s, 1H, CON*H*2-5'), 5.19 (t, 1H, H-4'', *J* = 6.2 Hz), 4.99 (d, 1H, H-1'', *J*1'',2'' = 5.0 Hz), 4.95 (dd, 1H, H-3', *J*3',2' = 6.4, *J*3',4' = 3.0 Hz), 4.72 (dd, 1H, H-2', *J*2',3' = 6.4, *J*2',1' = 3.2 Hz), 4.64 (t, 1H, H-4', *J* = 3.0 Hz), 4.46 (d, 1H, H-5', *J*5',4' = 3.0 Hz), 4.32 (t, 1H, H-3'', *J* = 6.2 Hz), 4.08 (dd, 1H, H-2'', *J*2'',3'' = 6.2, *J*2'',1'' = 5.0 Hz), 3.88-3.78 (m, 3H, H-5'', H-6''), 2.11 (s, 3H, OAc), 1.59 (s, 3H, Me), 1.52 (s, 3H, Me), 1.37 (s, 3H, Me), 1.36 (s, 3H, Me), 1.11-1.05 (m, 21H, Si(*i*-Pr)3); 13C NMR (CDCl3, 100 MHz) δ 169.7, 163.0, 150.1, 140.6, 115.7, 115.6, 110.5, 103.3, 96.1, 92.1, 83.9, 83.8, 80.6, 75.8, 75.0, 71.3, 69.1, 64.4, 62.5, 27.5, 27.2, 26.4, 25.4, 21.0, 18.0, 12.0; ESIMS-HR *m*/*z*: [M+Na]+ calcd for C33H53N3O13SiNa 750.3240, found 750.3264; [α]20D +29.17 (*c* 0.13, CHCl3).

Compound **S10**

A mixture of **S9** (1.76　g, 2.42 mmol) and triethylamine trihydrofluoride (7.59 mL, 46.6 mmol) in THF (50 mL) was stirred at 80 °C for 3 h. After cooled to 0 °C, the reaction was quenched with silica gel (10 g). The mixture was concentrated *in vacuo*.　The residue was purified by silica gel chromatography (4 g, MeOH/CHCl3 = 4%) to afford the crude primary alcohol (2.32 g) as white amorphous. A mixture of the crude primary alcohol (190 mg), dimethyl sulfoxide (141 μL, 1.98 mmol) and triethylamine (0.5 mL) in CH2Cl2 (2.5 mL) was treated with sulfur trioxide-pyridine complex (315 mg, 1.98 mmol) at room temperature for 2 h. After the reaction was quenched with water (0.3 mL), the mixture was concentrated *in vacuo*. The residue was purified by silica gel chromatography (8 g, MeOH/CHCl3 = 3%) to afford **S10** (42.1 mg, 0.0826 mmol, calcd. 42% over 2 steps) as a white amorphous solid.

1H NMR (CDCl3, 400 MHz) δ 9.32 (s, 1H, C*H*O-5''), 8.13 (br s, 1H, N*H*-3), 7.60 (d, 1H, H-6, *J*6,5 = 8.1 Hz), 7.11 (br s, 1H, CON*H*2-5'), 6.19 (d, 1H, H-4'', *J*4'',3'' = 4.3 Hz), 5.94 (d, 1H, H-1', *J*1',2' = 3.1 Hz), 5.73 (d, 1H, H-5, *J*5,6 = 8.1 Hz), 5.65 (br s, 1H, CON*H*2-5'), 5.16 (dd, 1H, H-3', *J*3',2' = 6.3, *J*3',4' = 2.8 Hz), 4.83 (dd, 1H, H-3'', *J*3'',2'' = 6.3, *J*3'',4'' = 4.3 Hz), 4.80 (t, 1H, H-4', *J* = 2.8 Hz), 4.77 (dd, 1H, H-2', *J*2',3' = 6.3, *J*2',1' = 3.1 Hz), 4.60-4.58 (m, 2H, H-5', H-1''), 4.06 (dd, 1H, H-2'', *J*2'',1'' = 8.1, *J*2'',3'' = 6.3 Hz), 1.61 (s, 3H, Me), 1.51 (s, 3H, Me), 1.46 (s, 3H, Me), 1.41 (s, 3H, Me); 13C NMR (CDCl3, 100 MHz) δ 185.2, 170.8, 163.7, 150.5, 150.3, 140.9, 116.7, 114.6, 110.8, 102.5, 100.1, 92.5, 85.5, 84.6, 81.0, 79.8, 73.6, 69.0, 27.7, 27.3, 25.5, 25.3; ESIMS-HR *m*/*z*: [M+H]+ calcd for C22H28N3O11 510.1718, found 510.1726; [α]20D +75.08 (*c* 0.17, CHCl3).

**CAP-CHO**

A mixture of **S10** (28.0 mg, 0.0550 mmol) and 80% *aq.* TFA (1 mL) was stirred at room temperature for 30 min. The mixture was concentrated *in vacuo*. The residue was purified by Hi-Flash reverse phase silica gel column chromatography (Sep-Pak C18, H2O) to afford **CAP-CHO** as white amorphous solid (10.0 mg, 0.0233 mmol, 42%).

1H NMR (DMSO-*d*6, 400 MHz) δ 11.31 (br s, 1H, N*H*-3), 9.18 (s, 1H, C*H*O-5''), 7.70 (d, 1H, H-6, *J*6,5 = 8.2 Hz), 7.61 (br s, 1H, CON*H*2-5'), 7.51 (br s, 1H, CON*H*2-5'), 6.01-6.00 (m, 1H, H-4''), 5.72 (d, 1H, H-1', *J*1',2' = 5.5 Hz), 5.65 (d, H-5, *J*5,6 = 8.2 Hz), 5.06 (d, 1H, H-1'', *J*1'',2'' = 3.2 Hz), 4.36-4.34 (m, 1H, H-3''), 4.28 (d, 1H, H-5', *J*5',4' = 1.4 Hz), 4.25-4.22 (m, 1H, H-4'), 4.06-4.04 (m, 1H, H-2''), 3.80-3.78 (m, 1H, H-2'), 3.72-3.70 (m, 1H, H-3'); 13C NMR (DMSO-*d*6, 100 MHz) δ 187.3, 170.1, 163.1, 150.6, 147.6, 140.0, 125.4, 101.9, 99.1, 87.3, 84.3, 76.2, 73.9, 70.4, 65.2, 61.9; ESIMS-HR *m*/*z*: [M+H]+ calcd for C16H20N3O11 430.1092, found 430.1104; [α]20D +165.48 (*c* 0.13, MeOH).

***General procedure for the synthesis of BZ and PA hydrazides***

A mixture of ester (1.0 mmol) in EtOH (1.0 mL) was treated with NH2NH2·H2O (122 μL, 2.5 mmol) at 100 ℃ for 12 h in a sealed tube. After the completion of the reaction, the reaction mixture was concentrated *in vacuo*. The precipitate was filtered and dried to afford **BZ2-22**, **24-36**, **38-47**, and **PA48-54**.

Hydrazide **BZ2**S1), **BZ3**S2), **BZ4**S3), **BZ5**S4), **BZ6**S5), **BZ7**S5), **BZ8**S5), **BZ9**S6), **BZ10**S7), **BZ11**S8), **BZ12**S9), **BZ13**S10), **BZ14**S11), **BZ15**S12), **BZ16**S12), **BZ17**S13), **BZ18**S14), **BZ19**S15), **BZ20**S10), **BZ21**S16), **BZ22**S17), **BZ25**S18), **BZ26**S19), **BZ27**S20), **BZ28**S21), **BZ29**S22), **BZ30**S23), **BZ32**S24), **BZ33**S25), **BZ34**S26), **BZ35**S27), **BZ36**S28), **BZ37**S29), **BZ40**S30), **BZ41**S31), **BZ42**S32), **BZ43**S33), **BZ44**S34), **BZ45**S35), **BZ46**S36), **BZ47**S37), **PA48**S38), **PA49**S39), **PA50**S40), **PA51**S41), **PA52**S42), and **PA53**S43) are known compound. Hydrazides **BZ1**, **BZ23**, **BZ24** and **PA54** are commercially available.

1*H*-Imidazole-2-carbohydrazide (**BZ31**)

Compound **BZ31** (111.6 mg, 0.92 mmol, 92% as a brown solid) was prepared from ethyl 2-imidazolecarboxylate (140 mg, 1.0 mmol) and NH2NH2·H2O (122 μL) in EtOH (1.0 mL) as described above.

1H NMR (DMSO-*d*6, 400 MHz) δ 9.56 (s, 1H, NH), 7.24 (s, 1H, Ph), 7.01 (s, 1H, Ph), 4.43 (s, 2H, NH2); 13C NMR (DMSO-*d*6, 100 MHz) δ 158.1, 140.3; ESIMS-LR *m/z* 127.1 [(M+H)+].

5-Aminobenzofuran-2-carbohydrazide (**BZ38**)

Compound **BZ39** (135.8 mg, 0.71 mmol, 71% as a brown solid) was prepared from ethyl 5-aminobenzofuran-2-carboxylate (205 mg, 1.0 mmol) and NH2NH2·H2O (122 μL) in EtOH (1.0 mL) as described above.

1H NMR (DMSO-*d*6, 400 MHz) δ 9.84 (s, 1H, NH), 7.27 (d, 1H, H-7, *J*7,6 = 8.8 Hz), 7.25 (d, 1H, H-3, *J* = 0.8 Hz), 6.75 (d, 1H, H-4, *J*4,6 = 2.2 Hz), 6.72 (dd, 1H, H-6, *J*6,7 = 8.8, *J*6,4 = 2.2 Hz), 4.97 (s, 2H, NH2), 4.51 (s, 2H, NH2); 13C NMR (DMSO-*d*6, 400 MHz) δ 158.3, 148.2, 147.6, 145.3, 127.8, 115.5, 111.7, 108.5, 104.2; ESIMS-LR *m/z* 192.1 [(M+H)+].

5-Nitrobenzofuran-2-carbohydrazide (**BZ39**)

Compound **BZ39** (197.8 mg, 0.89 mmol, 89% as a brown solid) was prepared from ethyl 5-nitrobenzofuran-2-carboxylate (235 mg, 1.0 mmol) and NH2NH2·H2O (122 μL) in EtOH (1.0 mL) as described above.

1H NMR (DMSO-*d*6, 400 MHz) δ 10.3 (s, 1H, NH), 8.77 (d, 1H, H-4, *J*4,6 = 2.6 Hz), 8.31 (dd, 1H, H-6, *J*6.4 = 2.6, *J*6,7 = 8.8 Hz), 7.89 (d, 1H, H-7, *J*7,6 = 8.8 Hz), 7.71 (s, 1H, H-3), 4.66 (s, 2H, NH2); 13C NMR (DMSO-*d*6, 400 MHz) δ137.0, 156.9, 151.2, 144.1, 127.7, 122.0, 119.4, 112.8, 109.5; ESIMSLR *m/z* 222.1 [(M+H)+].

***General procedure for the synthesis of AC hydrazides***

　A solution of 3-methylbutanoyl chloride or butanoic anhydride (1 mmol) in THF (5 mL) was treated with NH2NH2·H2O (243 μL, 5 mmol) at 0 °C for 2.5 h. The reaction mixture was concentrated *in vacuo*. The residue was purified by Hi-Flash silica gel column chromatography to afford **AC58** and **AC59**.

A solution of geranic acid and lauric acid (1 mmol) in CH2Cl2 (5 mL) was treated with (COCl)2 (85.8 μL, 1 mmol) at 0 °C for 30 min. The mixture was warmed to room temperature and stirred for 2 h. The reaction mixture was cooled at 0 °C and treated with NH2NH2·H2O (243 μL, 5 mmol) for 2 h. The resulting mixture was partitioned between Et2O and H2O. The organic layer was washed with brine, dried (Na2SO4), filtered and concentrated *in vacuo*. The residue was purified by Hi-Flash silica gel column chromatography to afford **AC60** and **AC61**.

Hydrazides **AC58**S44) and **AC61**S45) are known compounds. Compounds **AC55**, **AC56**, and **AC57** are commercially available.

3-Methylbutanohydrazide (**AC59**)

1H NMR (DMSO-*d*6, 400 MHz) δ 8.89 (s, 1H, N*H*), 4.16 (br s, 2H, N*H*2), 1.95 (m, 1H, C*H*-β), 1.88 (d, 2H, C*H*2-α, *J* = 6.4 Hz), 0.85 (d, 6H, C*H*3-γ, *J* = 6.3 Hz); ESIMSLR *m/z* 117.1 [(M+H)+].

(*E*)-3,7-Dimethyloctan-2,7-dienohydrazide (**AC60**)

1H NMR (DMSO-*d*6, 400 MHz) δ 8.94 (s, 1H, N*H*), 5.55 (s, 1H, C*H*-α), 5.07 (t, 1H, C=C*H*, *J* = 6.2 Hz), 4.20 (br s, 2H, N*H*2), 2.09-2.00 (m, 7H, C*H*2×2, C*H*3), 1.64 (s, 3H, C*H*3), 1.57 (s, 3H, C*H*3); ESIMSLR *m/z* 205.1 [(M+Na)+].

***General procedure for the synthesis of AA and LA hydrazides***

Each 2-chlorotrityl chloride (2-CTC) resin (300×2 mg, 0.51×2 mmol) was placed in two 10 mL polypropylene syringes fitted with a polyethylene filter disc. Each resin was agitated with CH2Cl2 (4 mL, 1h). After the removal of CH2Cl2, a solution of NH2NH2·H2O, *i*Pr2NEt, DMF, and MeOH (v/v 0.25/0.88/2.4/0.8, 4 mL) was added. After agitation for 1.5 h at room temperature, solvent and soluble reagents were removed by suction. All the resins were subjected to the following washing treatment with *i*Pr2NEt/MeOH/DMF (1/2/17×3), DMF (×3), and CH2Cl2 (×3). A solution of Fmoc-AA-OH (1.5×2 mmol), HBTU (1.45×2 mmol), and *i*Pr2NEt (4.12×2 mmol) in DMF (1.8×2 mL) was added to the resins, which were agitated for 1.5 h. All the resins were washed with DMF (×3) and CH2Cl2 (×3).

Amino acids bound resins (100 mg) were placed in a 5 mL polypropylene syringe fitted with a polyethylene filter disc. Each resin was agitated with CH2Cl2 (4 mL, 30 min). The resins were treated with piperidine/DMF (1:4. 5 min, then 1:9, 15 min) to remove the Fmoc group, and the resins were washed with DMF (×3) and CH2Cl2 (×3). A solution of *i*Pr2NEt (0.65 mL) in DMF (3 mL) was added to the resins, and acyl chloride (0.68 mmol) was added. In the case of carboxylic acid instead of acyl chloride, a solution of carboxylic acid (0.4 mmol), HBTU (0.4 mmol), and *i*Pr2NEt (1 mmol) in DMF (2 mL) was added to the resins. After agitation for 2 h, all the resins were washed with DMF (×3) and CH2Cl2 (×3). The resins were treated with 50% TFA/CH2Cl2, and the supernatant was concentrated *in vacuo*. In the case of amino acids possessing Trt and Pbf groups, the crude compound was treated with a solution of TFA/*i*Pr3SiH/H2O (95/2.5/2.5) for 15 min, and the resulting mixture was concentrated *in vacuo*. The residue was washed with Et2O (or hexane) to afford **AA** and **LA** hydrazides as TFA salts.

*N*-Acetyl-L-alanine hydrazide (**AA62**)

1H NMR (DMSO-*d*6, 400 MHz) δ 10.55 (s, 1H, N*H*), 8.25 (d, 1H, Ala-α-N*H*, *J* = 6.8 Hz), 4.25 (quin, 1H, Ala-α-C*H*, *J* = 7.2 Hz), 1.84 (s, 3H, Ac), 1.22 (d, 3H, Ala-β-C*H*3, *J* = 7.2 Hz); ESIMSLR *m/z* 168.0 [(M+Na)+].

*N*-Acetyl-L-phenylalanine hydrazide (**AA63**)

1H NMR (DMSO-*d*6, 400 MHz) δ 10.63 (s, 1H, N*H*), 8.34 (d, 1H, Phe-α-N*H*, *J* = 8.0 Hz), 7.30-7.19 (m, 5H, Ph), 4.52-4.46 (m, 1H, Phe-α-C*H*), 2.95 (dd, 1H, Phe-β-C*H*2, *J*gem = 13.6, *J*β,α = 4.8 Hz), 2.80 (dd, 1H, Phe-β-C*H*2, *J*gem = 13.6, *J*β,α = 9.6 Hz), 1.77 (s, 3H, Ac); ESIMSLR *m/z* 243.9 [(M+Na)+].

*N*-Acetyl-L-serine hydrazide (**AA64**)

1H NMR (DMSO-*d*6, 400 MHz) δ 10.75 (s, 1H, N*H*), 8.15 (d, 1H, Ser-α-N*H*, *J* = 7.6 Hz), 4.31 (dd, 1H, Ser-α-C*H*, *J* = 13.6, *J* = 6.0 Hz), 3.59 (d, 2H, Ser-β-C*H*2, *J* = 6.0 Hz), 1.87 (s, 3H, Ac); ESIMSLR *m/z* 161.9, [(M+H)+].

*N*-Acetyl-L-glutamic acid hydrazide (**AA65**)

1H NMR (DMSO-*d*6, 400 MHz) δ 10.74 (s, 1H, N*H*), 8.24 (d, 1H, Glu-α-N*H*, *J* = 8.0 Hz), 4.27-4.22 (m, 1H, Glu-α-C*H*), 2.26 (t, 2H, Glu-γ-C*H*2, *J* = 7.6 Hz), 1.95-1.70 (m, 2H, Glu-β-C*H*2), 1.85 (s, 3H, Ac); ESIMSLR *m/z* 225.3 [(M+Na)+].

*N*-Acetyl-L-glutamine hydrazide (**AA66**)

1H NMR (DMSO-*d*6, 400 MHz) δ 10.84 (s, 1H, N*H*), 8.27 (d, 1H, Gln-α-N*H*, *J* = 7.6 Hz), 7.31 (s, 1H, Gln-δ-N*H*2), 6.81 (s, 1H, Gln-δ-N*H*2), 4.24-4.18 (m, 1H, Gln-α-C*H*), 2.20-2.05 (m, 2H, Gln-γ-C*H*2), 1.95-1.81 (m, 1H, Glu-β-C*H*2), 1.86 (s, 3H, Ac), 1.77-1.71 (m, 1H, Glu-β-C*H*2); ESIMSLR *m/z* 224.9 [(M+Na)+].

*N*-Acetyl-L-lysine hydrazide (**AA67**)

1H NMR (DMSO-*d*6, 400 MHz) δ 10.60 (s, 1H, N*H*), 8.21 (d, 1H, Lys-α-N*H*, *J* = 8.0 Hz), 7.67 (br s, 3H, Lys-ε-N*H*3), 4.25-4.19 (m, 1H, Lys-α-C*H*), 2.80-2.72 (m, 2H, Lys-ε-C*H*2), 1.86 (s, 3H, Ac), 1.66-1.45 (m, 4H, Lys-β-C*H*2, Lys-δ-C*H*2), 1.39-1.28 (m, 2H, Lys-γ-C*H*2); ESIMSLR *m/z* 203.0 [(M+H)+].

*N*-Acetyl-L-arginine hydrazide (**AA68**)

1H NMR (DMSO-*d*6, 400 MHz) δ 10.28 (s, 1H, N*H*), 8.20 (d, 1H, Arg-α-N*H*, *J* = 8.4 Hz), 7.58 (br s, 1H, Arg-δ-N*H*), 7.48-6.69 (br s, 4H, Arg-δ-N*H*), 4.27-4.21 (m, 1H, Arg-α-C*H*), 3.12-3.07 (m, 2H, Arg-δ-C*H*2), 1.85 (s, 3H, Ac), 1.69-1.60 (m, 1H, Arg-β-C*H*2 or Arg-γ-C*H*2), 1.57-1.37 (m, 3H, Arg-β-C*H*2, Arg-γ-C*H*2); ESIMSLR *m/z* 231.0 [(M+H)+].

*N*-Octanoyl-L-alanine hydrazide (**LA69**)

1H NMR (DMSO-*d*6, 400 MHz) δ 10.73 (s, 1H, N*H*), 8.18 (d, 1H, Ala-α-N*H*, *J* = 7.2 Hz), 4.26 (quin, 1H, Ala-α-C*H*, *J* = 7.2 Hz), 2.10 (t, 2H, acyl-α-C*H*2, *J* = 7.6 Hz), 1.49-1.43 (m, 2H, acyl-β-C*H*2), 1.31-1.17 (m, 11H, Ala-β-C*H*3, acyl-C*H*2×4), 0.86 (t, 3H, acyl-C*H*3, *J* = 6.8 Hz); ESIMSLR *m/z* 252.1 [(M+Na)+].

*N*-(4-Phenylbenzoyl)-L-alanine hydrazide (**LA70**)

1H NMR (DMSO-*d*6, 400 MHz) δ 9.71 (s, 1H, N*H*), 8.61 (d, 1H, Ala-α-N*H*, *J* = 7.2 Hz), 8.00 (d, 2H, Ar, *J*= 8.4 Hz), 7.78 (d, 2H, Ar, *J* = 8.4 Hz), 7.74 (d, 2H, Ar, *J* = 8.4 Hz), 7.50 (t, 2H, Ar, *J* = 7.8 Hz), 7.41 (t, 1H, Ar, *J* = 7.2 Hz), 4.49 (quin, 1H, Ala-α-C*H*, *J* = 7.2 Hz), 1.36 (d, 3H, Ala-β-C*H*3, *J*β,α = 7.2 Hz); ESIMSLR *m/z* 284.1 [(M+H)+].

*N*-Isostearoyl-L-alanine hydrazide (**LA71**)

1H NMR (DMSO-*d*6, 400 MHz) δ 10.55 (s, 1H, N*H*), 8.14 (d, 1H, Ala-α-N*H*, *J* = 6.8 Hz), 4.26 (quin, 1H, Ala-α-C*H*, *J* = 6.8 Hz), 2.21-2.16 (m, 1H, acyl-α-C*H*), 1.46-1.33 (m, 2H, acyl-β-C*H*2), 1.31-1.09 (m, 29H, Ala-β-C*H*3, acyl-C*H*2×13), 0.85 (t, 6H, acyl-C*H*3×2, *J* = 7.0 Hz); ESIMSLR *m/z* 370.0 [(M+H)+].

*N*-Palmitoyl-L-alanine hydrazide (**LA72**)

1H NMR (DMSO-*d*6, 400 MHz) δ 10.48 (s, 1H, N*H*), 8.14 (d, 1H, Ala-α-N*H*, *J* = 6.8 Hz), 4.25 (quin, 1H, Ala-α-C*H*, *J* = 7.2 Hz), 2.09 (t, 2H, acyl-α-C*H*2, *J* = 7.6 Hz), 1.48-1.42 (m, 2H, acyl-β-C*H*2), 1.30-1.16 (m, 27H, Ala-β-C*H*3, acyl-C*H*2×12), 0.85 (t, 3H, acyl-C*H*3, *J* = 7.0 Hz); ESIMSLR *m/z* 342.2 [(M+H)+].

*N*-Octanoyl-L-phenylalanine hydrazide (**LA73**)

1H NMR (DMSO-*d*6, 400 MHz) δ 10.73 (s, 1H, N*H*), 8.18 (d, 1H, Phe-α-N*H*, *J* = 8.4 Hz), 7.28-7.18 (m, 5H, Ph), 4.52-4.46 (m, 1H, Phe-α-C*H*), 2.94 (dd, 1H, Phe-β-C*H*2, *J*gem = 13.2, *J*β,α = 4.9 Hz), 2.77 (dd, 1H, Phe-β-C*H*2, *J*gem = 13.2, *J*β,α = 10.1 Hz), 2.01 (t, 2H, acyl-α-C*H*2, *J* = 7.6 Hz), 1.37-1.01 (m, 12H, acyl-C*H*2×6), 0.85 (t, 3H, acyl-C*H*3, *J* = 7.4 Hz); ESIMSLR *m/z* 306.1 [(M+H)+].

*N*-(4-Phenylbenzoyl)-L-phenylalanine hydrazide (**LA74**)

1H NMR (DMSO-*d*6, 400 MHz) δ 10.31 (s, 1H, N*H*), 8.80 (d, 1H, Phe-α-N*H*, *J* = 8.4 Hz), 7.91 (d, 2H, Ar, *J*= 8.8 Hz), 7.76 (d, 2H, Ar, *J* = 8.8 Hz), 7.72 (d, 2H, Ar, *J* = 8.4 Hz), 7.49 (t, 2H, Ar, *J* = 7.6 Hz), 7.43-7.35 (m, 3H, Ar), 7.28 (t, 2H, Ar, *J* = 7.6 Hz), 7.20-7.16 (m, 1H, Ar), 4.73 (q, 1H, Phe-α-C*H*, *J* = 8.0 Hz), 3.08 (d, 2H, Phe-β-C*H*2, *J* = 7.6 Hz); ESIMSLR *m/z* 360.1 [(M+H)+].

*N*-Isostearoyl-L-phenylalanine hydrazide (**LA75**)

1H NMR (DMSO-*d*6, 400 MHz) δ 10.55 (s, 1H, N*H*), 8.18 (d, 1H, Phe-α-N*H*, *J* = 8.8 Hz), 7.28-7.14 (m, 5H, Ph), 4.58-4.52 (m, 1H, Phe-α-C*H*), 2.93 (dd, 1H, Phe-β-C*H*2, *J*gem = 13.5, *J*β,α = 4.5 Hz), 2.81 (dd, 1H, Phe-β-C*H*2, *J*gem = 13.5, *J*β,α = 10.8 Hz), 2.13-2.07 (m, 1H, acyl-α-C*H*), 1.37-1.00 (m, 28H, acyl-C*H*2×14), 0.89-0.84 (m, 6H, acyl-C*H*3×2); ESIMSLR *m/z* 446.1 [(M+H)+].

*N*-Palmitoyl-L-phenylalanine hydrazide (**LA76**)

1H NMR (DMSO-*d*6, 400 MHz) δ 10.49 (s, 1H, N*H*), 8.21 (d, 1H, Phe-α-N*H*, *J* = 8.0 Hz), 7.28-7.14 (m, 5H, Ph), 4.54-4.48 (m, 1H, Phe-α-C*H*), 2.95 (dd, 1H, Phe-β-C*H*2, *J*gem = 13.5, *J*β,α = 4.9 Hz), 2.79 (dd, 1H, Phe-β-C*H*2, *J*gem = 13.5, *J*β,α = 10.1 Hz), 2.02 (t, 2H, acyl-α-C*H*2, *J* = 7.4 Hz), 1.37-1.01 (m, 26H, acyl-C*H*2×13), 0.85 (t, 3H, acyl-C*H*3, *J* = 7.0 Hz); ESIMSLR *m/z* 418.2 [(M+H)+].

*N*-Octanoyl-L-serine hydrazide (**LA77**)

1H NMR (DMSO-*d*6, 400 MHz) δ 10.99 (s, 1H, N*H*), 8.07 (d, 1H, Ser-α-N*H*, *J* = 8.0 Hz), 4.32 (q, 1H, Ser-α-C*H*, *J* = 6.5 Hz), 3.60 (d, 2H, Ser-β-C*H*2, *J* = 6.0 Hz), 2.14 (t, 2H, acyl-α-C*H*2, *J* = 7.2 Hz), 1.50-1.42 (m, 2H, acyl-β-C*H*2), 1.29-1.20 (m, 8H, acyl-C*H*2×4), 0.85 (t, 3H, acyl-C*H*3, *J* = 7.0 Hz); ESIMSLR *m/z* 268.0 [(M+Na)+].

*N*-(4-Phenylbenzoyl)-L-serine hydrazide (**LA78**)

1H NMR (DMSO-*d*6, 400 MHz) δ 9.90 (s, 1H, N*H*), 8.42 (d, 1H, Ser-α-N*H*, *J* = 7.2 Hz), 8.01 (d, 2H, Ar, *J*= 8.0 Hz), 7.80 (d, 2H, Ar, *J* = 6.8 Hz), 7.75 (d, 2H, Ar, *J* = 8.0 Hz), 7.50 (t, 2H, Ar, *J* = 7.2 Hz), 7.42 (t, 1H, Ar, *J* = 8.4 Hz), 4.53 (q, 1H, Ser-α-C*H*, *J* = 6.0 Hz), 3.74 (d, 2H, Ser-β-C*H*2, *J* = 5.2 Hz); ESIMSLR *m/z* 300.1 [(M+H)+].

*N*-Isostearoyl-L-serine hydrazide (**LA79**)

1H NMR (DMSO-*d*6, 400 MHz) δ 10.54 (s, 1H, N*H*), 8.00 (d, 1H, Ser-α-N*H*, *J* = 7.6 Hz), 4.31 (q, 1H, Ser-α-C*H*, *J* = 6.4 Hz), 3.53 (obscured, 2H, Ser-β-C*H*2), 2.25-2.18 (m, 1H, acyl-α-C*H*), 1.47-1.10 (m, 28H, acyl-C*H*2×14), 0.85 (m, 6H, acyl-C*H*3×2); ESIMSLR *m/z* 386.0 [(M+H)+].

*N*-Palmitoyl-L-serine hydrazide (**LA80**)

1H NMR (DMSO-*d*6, 400 MHz) δ 10.38 (s, 1H, N*H*), 7.98 (d, 1H, Ser-α-N*H*, *J* = 8.0 Hz), 4.30 (q, 1H, Ser-α-C*H*, *J* = 6.4 Hz), 3.56 (d, 2H, Ser-β-C*H*2, *J* = 5.6 Hz), 2.13 (t, 2H, acyl-α-C*H*2, *J* = 7.2 Hz), 1.50-1.43 (m, 2H, acyl-β-C*H*2), 1.31-1.17 (m, 24H, acyl-C*H*2×12), 0.85 (t, 3H, acyl-C*H*3, *J* = 6.6 Hz); ESIMSLR *m/z* 358.2 [(M+H)+].

*N*-Octanoyl-L-glutamic acid hydrazide (**LA81**)

1H NMR (DMSO-*d*6, 400 MHz) δ 9.56 (br s, 1H, N*H*), 8.98 (d, 1H, Glu-α-N*H*, *J* = 8.0 Hz), 4.22 (q, 1H, Glu-α-C*H*, *J* = 7.3 Hz), 2.23-2.18 (m, 2H, Glu-γ-C*H*2), 2.15-2.09 (m, 2H, acyl-α-C*H*2), 1.92-1.68 (m, 2H, Glu-β-C*H*2), 1.51-1.43 (m, 2H, acyl-β-C*H*2), 1.30-1.19 (m, 8H, acyl-C*H*2×4), 0.85 (t, 3H, acyl-C*H*3, *J* = 7.0 Hz); ESIMSLR *m/z* 310.0 [(M+Na)+], 285.9 [(M-H)-].

*N*-(4-Phenylbenzoyl)-L-glutamic acid hydrazide (**LA82**)

1H NMR (DMSO-*d*6, 400 MHz) δ 9.73 (s, 1H, N*H*), 8.57 (d, 1H, Glu-α-N*H*, *J* = 8.0 Hz), 8.00 (d, 2H, Ar, *J*= 8.8 Hz), 7.78 (d, 2H, Ar, *J* = 8.8 Hz), 7.74 (d, 2H, Ar, *J* = 8.8 Hz), 7.50 (t, 2H, Ar, *J* = 7.8 Hz), 7.41 (t, 1H, Ar, *J* = 7.6 Hz), 4.45 (m, 1H, Glu-α-C*H*), 2.40-2.27 (m, 2H, Glu-γ-C*H*2), 2.08-1.91 (m, 2H, Glu-β-C*H*2); ESIMSLR *m/z* 342.1 [(M+H)+].

*N*-Isostearoyl-L-glutamic acid hydrazide (**LA83**)

1H NMR (DMSO-*d*6, 400 MHz) δ 10.61 (s, 1H, N*H*), 8.15 (d, 1H, Glu-α-N*H*, *J* = 7.6 Hz), 4.26 (m, 1H, Glu-α-C*H*), 2.31-2.20 (m, 3H, Glu-γ-C*H*2, acyl-α-C*H*), 1.90-1.75 (m, 2H, Glu-β-C*H*2), 1.46-1.12 (m, 28H, acyl-C*H*2×14), 0.85 (t, 6H, acyl-C*H*3×2, *J* = 6.4 Hz); ESIMSLR *m/z* 428.0 [(M+H)+].

*N*-Palmitoyl-L-glutamic acid hydrazide (**LA84**)

1H NMR (DMSO-*d*6, 400 MHz) δ 10.16 (s, 1H, N*H*), 8.06 (d, 1H, Glu-α-N*H*, *J* = 8.0 Hz), 4.23 (m, 1H, Glu-α-C*H*), 2.26-2.20 (m, 2H, Glu-γ-C*H*2), 2.17-2.06 (m, 2H, acyl-α-C*H*2), 1.91-1.70 (m, 2H, Glu-β-C*H*2), 1.50-1.43 (m, 2H, acyl-β-C*H*2), 1.30-1.18 (m, 24H, acyl-C*H*2×12), 0.85 (t, 3H, acyl-C*H*3, *J* = 7.0 Hz); ESIMSLR *m/z* 400.1 [(M+H)+], 398.1 [(M−H)−].

*N*-Octanoyl-L-glutamine hydrazide (**LA85**)

1H NMR (DMSO-*d*6, 400 MHz) δ 10.06 (s, 1H, N*H*), 8.06 (d, 1H, Gln-α-N*H*, *J* = 6.8 Hz), 7.28 (s, 1H, Gln-δ-N*H*2), 6.78 (s, 1H, Gln-δ-N*H*2), 4.19 (m, 1H, Gln-α-C*H*), 2.15-2.05 (m, 4H, Gln-γ-C*H*2, acyl-α-C*H*2), 1.90-1.68 (m, 2H, Gln-β-C*H*2), 1.51-1.44 (m, 2H, acyl-β-C*H*2), 1.30-1.19 (m, 8H, acyl-C*H*2×4), 0.86 (t, 3H, acyl-C*H*3, *J* = 6.8 Hz); ESIMSLR *m/z* 287.0 [(M+H)+].

*N*-(4-Phenylbenzoyl)-L-glutamine hydrazide (**LA86**)

1H NMR (DMSO-*d*6, 400 MHz) δ 10.80 (s, 1H, N*H*), 8.90 (d, 1H, Gln-α-N*H*, *J* = 7.2 Hz), 8.00 (d, 2H, Ar, *J*= 8.8 Hz), 7.80 (d, 2H, Ar, *J* = 8.8 Hz), 7.74 (d, 2H, Ar, *J* = 7.2 Hz), 7.51 (t, 2H, Ar, *J* = 7.6 Hz), 7.42 (t, 1H, Ar, *J* = 7.6 Hz), 7.39 (s, 1H, Gln-δ-N*H*2), 6.90 (s, 1H, Gln-δ-N*H*2), 4.43 (m, 1H, Gln-α-C*H*), 2.32-2.19 (m, 2H, Gln-γ-C*H*2), 2.10-1.93 (m, 2H, Gln-β-C*H*2); ESIMSLR *m/z* 363.1 [(M+Na)+].

*N*-Isostearoyl-L-glutamine hydrazide (**LA87**)

1H NMR (DMSO-*d*6, 400 MHz) δ 8.10 (br s, 1H, Gln-α-N*H*), 7.27 (br s, 1H, Gln-δ-N*H*2), 6.77 (br s, 1H, Gln-δ-N*H*2), 4.28-4.20 (m, 1H, Gln-α-C*H*), 2.25-2.06 (m, 3H, Gln-γ-C*H*2, acyl-α-C*H*), 1.90-1.72 (m, 2H, Gln-β-C*H*2), 1.47-1.13 (m, 28H, acyl-C*H*2×14), 0.85 (br s, 6H, acyl-C*H*3×2); ESIMSLR *m/z* 427.3 [(M+H)+].

*N*-Palmitoyl-L-glutamine hydrazide (**LA88**)

1H NMR (DMSO-*d*6, 400 MHz) δ 10.38 (s, 1H, N*H*), 8.11 (d, 1H, Gln-α-N*H*, *J* = 7.2 Hz), 7.29 (s, 1H, Gln-δ-N*H*2), 6.79 (s, 1H, Gln-δ-N*H*2), 4.20 (m, 1H, Gln-α-C*H*), 2.17-2.06 (m, 4H, Gln-γ-C*H*2, acyl-α-C*H*2), 1.90-1.69 (m, 2H, Gln-β-C*H*2), 1.51-1.44 (m, 2H, acyl-β-C*H*2), 1.30-1.19 (m, 24H, acyl-C*H*2×12), 0.85 (t, 3H, acyl-C*H*3, *J* = 7.0 Hz); ESIMSLR *m/z* 399.3 [(M+H)+].

*N*-Octanoyl-L-lysine hydrazide (**LA89**)

1H NMR (DMSO-*d*6, 400 MHz) δ 9.82 (s, 1H, N*H*), 8.00 (d, 1H, Lys-α-N*H*, *J* = 7.2 Hz), 7.65 (br s, 3H, Lys-ε-N*H*3), 4.21 (m, 1H, Lys-α-C*H*), 2.79-2.70 (m, 2H, Lys-ε-C*H*2), 2.11 (t, 2H, acyl-α-C*H*2, *J* = 7.2 Hz), 1.62-1.42 (m, 6H, Lys-β-C*H*2, Lys-δ-C*H*2, acyl-β-C*H*2), 1.38-1.19 (m, 10H, Lys-γ-C*H*2, acyl-C*H*2×4), 0.86 (t, 3H, acyl-C*H*3, *J* = 7.0 Hz); ESIMSLR *m/z* 287.0 [(M+H)+].

*N*-(4-Phenylbenzoyl)-L-lysine hydrazide (**LA90**)

1H NMR (DMSO-*d*6, 400 MHz) δ 8.71 (d, 1H, Lys-α-N*H*, *J* = 7.4 Hz), 8.01 (d, 2H, Ar, *J*= 8.8 Hz), 7.80 (d, 2H, Ar, *J* = 8.0 Hz), 7.74 (d, 2H, Ar, *J* = 7.2 Hz), 7.65 (br s, 3H, Lys-ε-N*H*3), 7.51 (t, 2H, Ar, *J* = 7.8 Hz), 7.42 (t, 1H, Ar, *J* = 7.4 Hz), 4.48 (m, 1H, Lys-α-C*H*), 2.83-2.73 (m, 2H, Lys-ε-C*H*2), 1.88-1.31 (m, 6H, Lys-β-C*H*2, Lys-γ-C*H*2, Lys-δ-C*H*2); ESIMSLR *m/z* 341.2 [(M+H)+].

*N*-Isostearoyl-L-lysine hydrazide (**LA91**)

1H NMR (DMSO-*d*6, 400 MHz) δ 10.49 (s, 1H, N*H*), 8.11 (d, 1H, Lys-α-N*H*, *J* = 7.2 Hz), 7.70 (s, 3H, Lys-ε-N*H*3), 4.24 (q, 1H, Lys-α-C*H*, *J* = 7.5 Hz), 2.78-2.69 (m, 2H, Lys-ε-C*H*2), 2.23-2.18 (m, 1H, acyl-α-C*H*), 1.60-1.10 (m, 34H, Lys-β-C*H*2, Lys-γ-C*H*2, Lys-δ-C*H*2, acyl-C*H*2×14), 0.86 (t, 6H, acyl-C*H*3×2, *J* = 6.4 Hz); ESIMSLR *m/z* 427.1 [(M+H)+].

*N*-Palmitoyl-L-lysine hydrazide (**LA92**)

1H NMR (DMSO-*d*6, 400 MHz) δ 7.99 (d, 1H, Lys-α-N*H*, *J* = 8.4 Hz), 7.64 (s, 3H, Lys-ε-N*H*3), 4.20 (m, 1H, Lys-α-C*H*), 2.78-2.70 (m, 2H, Lys-ε-C*H*2), 2.10 (t, 2H, acyl-α-C*H*2, *J* = 7.6 Hz), 1.64-1.41 (m, 6H, Lys-β-C*H*2, Lys-δ-C*H*2, acyl-β-C*H*2), 1.34-1.15 (m, 26H, Lys-γ-C*H*2, acyl-C*H*2×12), 0.85 (t, 3H, acyl-C*H*3, *J* = 6.8 Hz); ESIMSLR *m/z* 399.2 [(M+H)+].

*N*-Octanoyl-L-arginine hydrazide (**LA93**)

1H NMR (DMSO-*d*6, 400 MHz) δ 8.04 (d, 1H, Arg-α-N*H*, *J* = 7.6 Hz), 7.48 (br s, 1H, Arg-δ-N*H*), 7.47-6.58 (br s, 4H, Arg-δ-N*H*), 4.23 (q, 1H, Arg-α-C*H*, *J* = 7.2 Hz), 3.08 (q, 2H, Arg-δ-C*H*2, *J* = 6.2 Hz), 2.11 (t, 2H, acyl-α-C*H*2, *J* = 7.4 Hz), 1.67-1.34 (m, 6H, Arg-β-C*H*2, Arg-γ-C*H*2, acyl-β-C*H*2), 1.30-1.14 (m, 8H, acyl-C*H*2×4), 0.86 (t, 3H, acyl-C*H*3, *J* = 7.2 Hz); ESIMSLR *m/z* 315.1 [(M+H)+].

*N*-Isostearoyl-L-arginine hydrazide (**LA94**)

1H NMR (DMSO-*d*6, 400 MHz) δ 10.37 (s, 1H, N*H*), 8.08 (d, 1H, Arg-α-N*H*, *J* = 7.6 Hz), 7.50 (br s, 1H, Arg-δ-N*H*), 7.39-6.62 (br s, 4H, Arg-δ-N*H*), 4.24 (m, 1H, Lys-α-C*H*), 3.13-3.08 (m, 2H, Arg-δ-C*H*2), 2.27-2.19 (m, 1H, acyl-α-C*H*), 1.68-1.10 (m, 32H, Arg-β-C*H*2, Arg-γ-C*H*2,, acyl-C*H*2×14), 0.87-0.83 (m, 6H, acyl-C*H*3×2); ESIMSLR *m/z* 455.3 [(M+H)+].

*N*-(4-Phenylbenzoyl)-L-arginine hydrazide (**LA95**)

1H NMR (DMSO-*d*6, 400 MHz) δ 9.39 (s, 1H, N*H*), 8.54 (d, 1H, Arg-α-N*H*, *J* = 8.0 Hz), 8.00 (d, 2H, Ar, *J*= 8.0 Hz), 7.80-7.72 (m, 4H, Ar), 7.52-7.47 (m, 3H, Arg-δ-N*H*, Ar), 7.42 (t, 1H, Ar, *J* = 7.2 Hz), 7.42-6.67 (br s, 4H, Arg-δ-N*H*), 4.46 (m, 1H, Arg-α-C*H*), 3.16-3.11 (m, 2H, Arg-δ-C*H*2), 1.91-1.42 (m, 4H, Arg-β-C*H*2, Arg-γ-C*H*2); ESIMSLR *m/z* 369.1 [(M+H)+].

*N*-Palmitoyl-L-arginine hydrazide (**LA96**)

1H NMR (DMSO-*d*6, 400 MHz) δ 8.01 (d, 1H, Arg-α-N*H*, *J* = 8.4 Hz), 7.46 (br s, 1H, Arg-δ-N*H*), 7.47-6.64 (br s, 4H, Arg-δ-N*H*), 4.23 (q, 1H, Arg-α-C*H*, *J* = 7.2 Hz), 3.10-3.06 (m, 2H, Arg-δ-C*H*2), 2.11 (t, 2H, acyl-α-C*H*2, *J* = 7.4 Hz), 1.66-1.12 (m, 30H, Arg-β-C*H*2, Arg-γ-C*H*2, acyl-C*H*2×13), 0.85 (t, 3H, acyl-C*H*3, *J* = 6.6 Hz); ESIMSLR *m/z* 427.3 [(M+H)+].

*N*-Palmitoyl-L-glutamic acid-L-glutamic acid hydrazide (**LA97**)

1H NMR (DMSO-*d*6, 400 MHz) δ 10.47 (s, 1H, N*H*), 8.18 (d, 1H, Glu-α-N*H*, *J* = 7.2 Hz), 7.96 (d, 1H, Glu-α-N*H*, *J* = 8.0 Hz), 4.28-4.21 (m, 2H, Glu-α-C*H*×2), 2.30-2.04 (m, 6H, Glu-γ-C*H*2×2, acyl-α-C*H*2), 1.93-1.64 (m, 4H, Glu-β-C*H*2×2), 1.50-1.41 (m, 2H, acyl-β-C*H*2), 1.30-1.16 (m, 24H, acyl-C*H*2×12), 0.85 (t, 3H, acyl-C*H*3, *J* = 7.0 Hz); ESIMSLR *m/z* 527.1 [(M+H)+], 527.1 [(M−H)−].

*N*-Palmitoyl-L-lysine-L-lysine hydrazide (**LA98**)

1H NMR (DMSO-*d*6, 400 MHz) δ 8.11 (d, 1H, Lys-α-N*H*, *J* = 8.4 Hz), 7.94 (d, 1H, Lys-α-N*H*, *J* = 8.4 Hz), 7.72 (br s, 6H, Lys-ε-N*H*3×2), 4.25-4.19 (m, 2H, Lys-α-C*H*×2), 2.78-2.70 (m, 4H, Lys-ε-C*H*2×2), 2.16-2.02 (m, 2H, acyl-α-C*H*2), 1.66-1.42 (m, 10H, Lys-β-C*H*2×2, Lys-δ-C*H*2×2, acyl-β-C*H*2), 1.40-1.18 (m, 28H, Lys-γ-C*H*2×2, acyl-C*H*2×12) 0.85 (t, 3H, acyl-C*H*3, *J* = 7.0 Hz); ESIMSLR *m/z* 527.2 [(M+H)+].

***Synthesis of palmitoyl amino acid fragments***

Each 2-chlorotrityl chloride (2-CTC) resin (1.6 mmol/g, 1 equiv.) was placed in a 5 mL polypropylene syringe fitted with a polyethylene filter disc. Each resin was agitated with CH2Cl2 for 30 min. After the removal of CH2Cl2, a solution of Fmoc-AA-OH (3 equiv.) and *i*Pr2NEt (8 equiv.) in CH2Cl2 (1 mL) was added. After agitation for 2 h at room temperature, solvent and soluble reagents were removed by suction. All the resins were subjected to the following washing treatment with *i*Pr2NEt/MeOH/DMF (1/2/17 ×3), DMF (×3), and CH2Cl2 (×3). The resins were treated with piperidine/DMF (1:4. 5 min, then 1:9, 15 min) to remove the Fmoc group, and the resins were washed with DMF (×3) and CH2Cl2 (×3). A solution of *i*Pr2NEt (8 equiv.) in DMF (0.7 mL) was added to the resins, and palmitoyl chloride (4 equiv.) was added. After agitation for 1.5 h, all the resins were washed with DMF (×3) and CH2Cl2 (×3). The resins were treated with 1% TFA/CH2Cl2, and the supernatant was concentrated *in vacuo* (toluene co-evaporation ×3). The resulting solid was used for the next step without further purification.

*N*α-Pamitoyl *N*ε-Boc lysine

2-CTC resin (150 mg) was used to afford the title compound (80.0 mg) as a white solid.

1H NMR (DMSO-*d*6, 400 MHz) δ 7.97 (d, 1H, Lys-α-N*H*, *J* = 8.2 Hz), 6.75 (br s, 1H, Lys-ε-N*H*), 4.15-4.09 (m, 1H, Lys-α-C*H*), 2.90-2.85 (m, 2H, Lys-ε-C*H*2), 2.13-2.05 (m, 2H, acyl-α-C*H*2), 1.70-1.62 (m, 1H, Lys-β-C*H*2), 1.59-1.43 (m, 3H, Lys-β-C*H*2, acyl-β-C*H*2), 1.40-1.16 (m, 37H, Lys-γ-C*H*2, Lys-δ-C*H*2, *t*Bu, acyl-C*H*2×12), 0.85 (t, 3H, acyl-C*H*3, *J* = 6.8 Hz); ESIMSLR *m/z* 507.6 [(M+Na)+].

*N*α-Palmitoyl *N*ω-Pbf arginine

2-CTC resin (150 mg) was used to afford the title compound (140 mg) as a yellow solid.

1H NMR (DMSO-*d*6, 400 MHz) δ 8.01 (d, 1H, Arg-α-N*H*, *J* = 7.8 Hz), 4.15-4.10 (m, 1H, Arg-α-C*H*), 3.02 (q, 2H, Arg-δ-C*H*2, *J* = 6.3 Hz), 2.96 (s, 2H, Pbf-C*H*2), 2.47 (s, 3H, Pbf-C*H*3), 2.42 (s, 3H, Pbf-C*H*3), 2.09 (t, 2H, acyl-α-C*H*2, *J* = 7.3 Hz), 2.00 (s, 3H, Pbf-C*H*3), 1.72-1.62 (m, 1H, Arg-β-C*H*2), 1.57-1.33 (m, 11H, Arg-β-C*H*2, Arg-γ-C*H*2,acyl-β-C*H*2, Pbf-C*H*3×2), 1.30-1.18 (m, 24H, acyl-C*H*2×12), 0.85 (t, 3H, acyl-C*H*3, *J* = 6.9 Hz); ESIMSLR *m/z* 665.7 [(M+H)+], 663.6 [(M−H)−].

*tert*-Butyl 5-*O*-[5-(*tert*-butyloxycarbonylamino)-5-deoxy-2,3-*O*-(3-pentylidene)-β-D-*ribo*-pentofuranosyl]-6-[4-(azidomethyl)benzylamino]-6-deoxy-2,3-*O*-isopropylidene-1-(uracil-1-yl)-β-D-*glycelo*-L-*taro*-heptofuranuronate (**S11**)

According to general procedure A, **S1** (50.0 mg, 70.1 μmol) and 4-azidomethylbenzaldehyde (16.9 mg, 105 μmol, 1.5 equiv.) were used to afford **S11** (43.1 mg, 72%) as a white solid after Hi-Flash silica gel column chromatography (S size, hexane/EtOAc = 3/2 → 2/3 gradient elution).

1H NMR (CDCl3, 400 MHz) δ 8.19 (br s, 1H, N*H*-3), 7.37 (d, 2H, Ar, *J*= 8.2 Hz), 7.23 (d, 2H, Ar, *J*= 8.2 Hz), 7.22 (d, 1H, H-6, *J*6,5 = 8.2 Hz), 5.93 (br t, 1H, BocN*H*, *J* = 8.1 Hz), 5.67 (dd, 1H, H-5, *J*5,6 = 8.1, *J*5,3 = 1.8 Hz), 5.51 (d, 1H, H-1', *J*1',2' = 1.8 Hz), 5.09 (dd, 1H, H-2', *J*2',3' = 6.3, *J*2',1' = 1.8 Hz), 5.01 (s, 1H, H-1''), 4.75 (dd, 1H, H-3', *J*3',2' = 6.3, *J*3',4' = 4.5 Hz), 4.64 (dd, 1H, H-4', *J*4',5' = 9.1, *J*4',3' = 4.5 Hz), 4.56-4.51 (m, 2H, H-2'', H-3''), 4.31 (s, 2H, ArC*H*2), 4.26-4.23 (m, 1H, H-4''), 4.09 (br d, 1H, H-5', *J* = 8.6 Hz), 3.94 (d, 1H, ArC*H*2, *J*gem = 13.4 Hz), 3.60 (d, 1H, ArC*H*2, *J*gem = 13.4 Hz), 3.30 (d, 1H, H-6', *J*6',5' = 1.8 Hz), 3.24-3.16 (m, 1H, H-5''), 3.14-3.06 (m, 1H, H-5''), 1.58 (s, 3H, isopropylidene-C*H*3), 1.52 (s, 9H, *t*Bu), 1.39 (s, 9H, *t*Bu), 1.34 (s, 3H, isopropylidene-C*H*3), 1.61-1.35 (m, 4H, pentylidene-C*H*2×2), 0.77 (t, 6H, pentylidene-C*H*3×2, *J* = 7.5 Hz); 13C NMR (CDCl3, 100 MHz) δ 172.2, 163.3, 156.3, 150.0, 143.6, 140.4, 134.1, 129.0, 128.3, 116.1, 114.7, 112.9, 102.4, 96.1, 88.0, 87.1, 86.8, 84.8, 82.6, 82.2, 82.1, 81.9, 79.0, 61.5, 54.7, 51.9, 43.3, 29.5, 28.9, 28.5, 28.4, 27.4, 25.6, 8.6, 7.4; ESIMS-HR *m*/*z*: [M+H]+ calcd. for C41H60N7O13 858.4244, found 858.4262; [α]23D +8.30 (*c* 0.43, CHCl3).

*tert*-Butyl 5-*O*-[5-(*tert*-butyloxycarbonylamino)-5-deoxy-2,3-*O*-(3-pentylidene)-β-D-*ribo*-pentofuranosyl]-6-[3-(azidomethyl)benzylamino]-6-deoxy-2,3-*O*-isopropylidene-1-(uracil-1-yl)-β-D-*glycelo*-L-*taro*-heptofuranuronate (**S12**)

According to general procedure A, **S1** (50.0 mg, 70.1 μmol) and 3-azidomethylbenzaldehyde (16.9 mg, 105 μmol, 1.5 equiv.) were used to afford **S12** (50.0 mg, 83%) as a white solid after silica gel column chromatography (ϕ1.1×7 cm, MeOH/CHCl3 = 0% → 1%).

1H NMR (CDCl3, 400 MHz) δ 8.32 (br s, 1H, N*H*-3), 7.39-7.18 (m, 5H, Ar, H-6), 5.91 (br s, 1H, BocN*H*), 5.66 (d, 1H, H-5, *J*5,6 = 7.7 Hz), 5.52 (br s, 1H, H-1'), 5.09 (br d, 1H, H-2', *J* = 6.3 Hz), 5.02 (br s, 1H, H-1''), 4.77 (t, 1H, H-3', *J* = 5.4 Hz), 4.62 (dd, 1H, H-4', *J*4',5' = 9.1, *J*4',3' = 4.5 Hz), 4.57-4.51 (m, 2H, H-2'', H-3''), 4.32 (s, 2H, ArC*H*2), 4.26-4.22 (m, 1H, H-4''), 4.09 (br d, 1H, H-5', *J* = 8.6 Hz), 3.94 (d, 1H, ArC*H*2, *J*gem = 13.1 Hz), 3.61 (d, 1H, ArC*H*2, *J*gem = 13.1 Hz), 3.31 (s, 1H, H-6'), 3.25-3.17 (m, 1H, H-5''), 3.13-3.04 (m, 1H, H-5''), 1.68-1.32 (m, 28H, *t*Bu×2, pentylidene-C*H*2×2, isopropylidene-C*H*3×2), 0.78 (t, 6H, pentylidene-C*H*3×2, *J* = 7.3 Hz); 13C NMR (CDCl3, 100 MHz) δ 172.2, 163.7, 156.3, 150.1, 143.5, 140.8, 135.4, 128.8, 128.5, 128.3, 126.9, 116.1, 114.7, 112.8, 102.4, 95.8, 87.9, 87.0, 86.7, 84.7, 82.6, 82.2, 82.0, 81.9, 79.0, 61.6, 54.8, 52.1, 43.3, 29.5, 28.9, 28.5, 28.3, 27.3, 25.6, 8.5, 7.4; ESIMS-HR *m*/*z*: [M+H]+ calcd. for C41H60N7O13 858.4244, found 858.4262; [α]22D +6.88 (*c* 0.58, CHCl3).

2,2,2-trichloroethyl *N*-(4-formylphenyl)carbamate

A solution of 4-aminobenzyl alcohol (246 mg, 2.00 mmol) and pyridine (323 μL, 4.00 mmol, 2.0 equiv.) in CH2Cl2 was treated with TrocCl (241 μL, 1.80 mmol, 0.9 equiv.) at 0 °C for 2 h. Sodium hydroxide (0.5 M in H2O, 2 mL) was added to the reaction mixture and the mixture was stirred for 6 h. The resulting mixture was partitioned between EtOAc and 1 M *aq.* HCl, and the organic layer was washed with brine, dried (Na2SO4), filtered and concentrated *in vacuo*. A solution of the crude in CH2Cl2 was treated with Dess-Martin periodinane (580 mg, 1.37 mmol, 0.68 equiv.) at 0 °C for 10 min. The reaction was quenched with *sat. aq.* Na2S2O3/*sat. aq.* NaHCO3 (v/v 1/1), and the resulting mixture was extracted with EtOAc. The organic layer was washed with brine, dried (Na2SO4), filtered and concentrated *in vacuo*. The residue was purified by Hi-Flash silica gel column chromatography (L size, hexane/EtOAc = 95/5 to 75/25 gradient elution) to afford the title compound (247 mg, 42% over 2 steps) as a yellow oil.

1H NMR (CDCl3, 400 MHz) δ 9.94 (s, 1H, C*H*O), 7.88 (d, 2H, H-2, H-6, *J* = 8.1 Hz), 7.61 (d, 2H, H-3, H-5, *J* = 8.1 Hz), 7.12 (br s, 1H, N*H*), 4.85 (s, 2H, O-C*H*2CCl3); 13C NMR (CDCl3, 100 MHz) δ 191.3, 151.2, 143.0, 132.3, 131.5, 118.5, 95.0, 74.8; ESIMSLR *m/z* 382.0 [(M+2MeOH+Na)+].

2,2,2-trichloroethyl *N*-(3-formylphenyl)carbamate

A solution of 3-aminobenzyl alcohol (246 mg, 2.00 mmol) and pyridine (323 μL, 4.00 mmol, 2.0 equiv.) in CH2Cl2 was treated with TrocCl (241 μL, 1.80 mmol, 0.9 equiv.) at 0 °C for 2 h. Sodium hydroxide (0.5 M in H2O, 2 mL) was added to the reaction mixture and the mixture was stirred for 6 h. The resulting mixture was partitioned between EtOAc and 1 M *aq.* HCl, and the organic layer was washed with brine, dried (Na2SO4), filtered and concentrated *in vacuo*. A solution of the crude in CH2Cl2 was treated with Dess-Martin periodinane (580 mg, 1.37 mmol, 0.68 equiv.) at 0 °C for 10 min. The reaction was quenched with *sat. aq.* Na2S2O3/*sat. aq.* NaHCO3 (v/v 1/1), and the resulting mixture was extracted with EtOAc. The organic layer was washed with brine, dried (Na2SO4), filtered and concentrated *in vacuo*. The residue was purified by Hi-Flash silica gel column chromatography (L size, hexane/EtOAc = 95/5 to 75/25 gradient elution) to afford the title compound (211 mg, 36% over 2 steps) as a yellow oil.

1H NMR (CDCl3, 400 MHz) δ 10.01 (s, 1H, C*H*O), 7.96 (s, 1H, H-2), 7.73 (br d, 1H, H-6, *J* = 7.2 Hz), 7.65 (d, 1H, H-4, *J* = 7.6 Hz), 7.53 (t, 1H, H-5, *J* = 7.9 Hz), 7.03 (br s, 1H, N*H*), 4.85 (s, 2H, O-C*H*2CCl3); 13C NMR (CDCl3, 100 MHz) δ 192.1, 151.6, 138.2, 137.4, 130.1, 125.6, 124.7, 119.6, 95.2, 74.7; ESIMSLR *m/z* 350.0 [(M+MeOH+Na)+]

*tert*-Butyl 5-*O*-[5-(*tert*-butyloxycarbonylamino)-5-deoxy-2,3-*O*-(3-pentylidene)-β-D-*ribo*-pentofuranosyl]-6-deoxy-2,3-*O*-isopropylidene-6-[4-(2,2,2-trichloroethylcarbonylamino)benzylamino]-1-(uracil-1-yl)-β-D-*glycelo*-L-*taro*-heptofuranuronate (**S13**)

According to general procedure A, **S1** (50.0 mg, 70.1 μmol) and 2,2,2-trichloroethyl *N*-(4-formylphenyl)carbamate (31.1 mg, 105 μmol, 1.5 equiv.) were used to afford **S13** (56.5 mg, 81%) as a white solid after silica gel column chromatography (ϕ1.1×7 cm, MeOH/CHCl3 = 0% → 1%).

1H NMR (CDCl3, 400 MHz) δ 8.21 (br s, 1H, N*H*-3), 7.35-7.28 (m, 4H, Ar), 7.20 (d, 1H, H-6, *J*6,5 = 8.2Hz), 6.87 (br s, 1H, TrocN*H*), 5.93 (br s, 1H, BocN*H*), 5.66 (dd, 1H, H-5, *J*5,6 = 8.2, *J*5,3 = 1.8 Hz), 5.51 (d, 1H, H-1', *J*1',2' = 1.8 Hz), 5.07 (dd, 1H, H-2', *J*2',3' = 6.3, *J*2',1' = 1.8 Hz), 5.01 (br s, 1H, H-1''), 4.82 (s, 2H, OC*H*2CCl3), 4.74 (dd, 1H, H-3', *J*3',2' = 6.3, *J*3',4' = 4.5 Hz), 4.61 (dd, 1H, H-4', *J*4',5' = 8.6, *J*4',3' = 4.5 Hz), 4.56-4.51 (m, 2H, H-2'', H-3''), 4.26-4.23 (m, 1H, H-4''), 4.08 (br d, 1H, H-5', *J* = 9.1 Hz), 3.90 (d, 1H, ArC*H*2, *J*gem = 13.1 Hz), 3.57 (d, 1H, ArC*H*2, *J*gem = 13.1 Hz), 3.28 (d, 1H, H-6', *J* = 1.8 Hz), 3.24-3.17 (m, 1H, H-5''), 3.13-3.05 (m, 1H, H-5''), 1.62-1.34 (m, 28H, *t*Bu×2, pentylidene-C*H*2×2, isopropylidene-C*H*3×2), 0.78 (t, 6H, pentylidene-C*H*3×2, *J* = 7.5 Hz); 13C NMR (CDCl3, 100 MHz) δ 172.2, 163.7, 156.3, 151.7, 150.0, 143.4, 136.2, 135.7, 129.3, 118.8, 116.1, 114.7, 112.8, 102.4, 95.7, 95.4, 87.7, 87.0, 86.7, 84.6, 82.6, 82.2, 81.9, 81.7, 79.0, 74.5, 61.2, 51.6, 43.3, 29.4, 28.8, 28.5, 28.3, 27.3, 25.6, 8.5, 7.4; ESIMS-HR *m*/*z*: [M+H]+ calcd. for C43H61Cl3N5O15 992.3224, found 992.3250; [α]22D +3.70 (*c* 0.64, CHCl3).

*tert*-Butyl 5-*O*-[5-(*tert*-butyloxycarbonylamino)-5-deoxy-2,3-*O*-(3-pentylidene)-β-D-*ribo*-pentofuranosyl]-6-deoxy-2,3-*O*-isopropylidene-6-[3-(2,2,2-trichloroethylcarbonylamino)benzylamino]-1-(uracil-1-yl)-β-D-*glycelo*-L-*taro*-heptofuranuronate (**S14**)

According to general procedure A, **S1** (50.0 mg, 70.1 μmol) and 2,2,2-trichloroethyl *N*-(3-formylphenyl)carbamate (31.1 mg, 105 μmol, 1.5 equiv.) was used to afford **S14** (56.1 mg, 81%) as a white solid after silica gel column chromatography (ϕ1.1×7 cm, MeOH/CHCl3 = 0% → 1%).

1H NMR (CDCl3, 400 MHz) δ 8.19 (br s, 1H, N*H*-3), 7.49-7.45 (m, 1H, Ar), 7.32-7.19 (m, 3H, Ar, H-6), 7.08-7.02 (m, 2H, Ar, TrocN*H*), 5.92 (br s, 1H, BocN*H*), 5.65 (d, 1H, H-5, *J*5,6 = 7.7 Hz), 5.53 (br s, 1H, H-1'), 5.12 (br d, 1H, H-2', *J*' = 6.3 Hz), 4.99 (br s, 1H, H-1''), 4.83 (s, 2H, OC*H*2CCl3), 4.80 (dd, 1H, H-3', *J*3',2' = 6.3, *J*3',4' = 4.5 Hz), 4.63-4.52 (m, 3H, H-4', H-2'', H-3''), 4.23 (dd, 1H, H-4'', *J* = 6.3, *J* = 4.1 Hz), 4.11 (br d, 1H, H-5', *J* = 8.2 Hz), 3.94 (d, 1H, ArC*H*2, *J*gem = 13.1 Hz), 3.62 (d, 1H, ArC*H*2, *J*gem = 13.1 Hz), 3.29 (br s, 1H, H-6'), 3.26-3.18 (m, 1H, H-5''), 3.15-3.07 (m, 1H, H-5''), 1.62-1.36 (m, 28H, *t*Bu×2, pentylidene-C*H*2×2, isopropylidene-C*H*3×2), 0.78 (t, 6H, pentylidene-C*H*3×2, *J* = 7.3 Hz); 13C NMR (CDCl3, 100 MHz) δ 172.1, 163.6, 156.4, 151.6, 150.1, 143.5, 141.1, 137.4, 129.2, 124.1, 118.6, 117.6, 116.1, 114.7, 112.8, 102.5, 95.7, 95.4, 87.8, 87.0, 86.7, 84.5, 82.6, 82.2, 81.7, 79.1, 74.5, 61.1, 51.7, 43.4, 29.4 28.8, 28.5, 18.3, 27.3, 25.6, 8.6, 7.4; ESIMS-HR *m*/*z*: [M+H]+ calcd. for C43H61Cl3N5O15 992.3224, found 992.3250; [α]23D -0.51 (*c* 0.71, CHCl3).

***General procedure D (Staudinger reaction, and amide formation)***

A solution of **S11** or **S12** (1.0 equiv.) in THF/H2O (0.7 mL, 5/2 v/v) was treated with PPh3 (1.2 equiv.) at 45 °C for 2.5~5 h. The reaction mixture was cooled and partitioned between CH2Cl2 and 0.1 M *aq.* HCl. The aqueous layer was washed with CH2Cl2. The organic layer was extracted with 0.1 M *aq.* HCl. The combined aqueous layer was neutralized with NaHCO3, and the resulting mixture was extracted with EtOAc. The organic layer was washed with brine, dried (Na2SO4), filtered and concentrated *in vacuo*. A solution of the crude amine and carboxylic acid (1.5 equiv.) in CH2Cl2 (1 mL) was treated with HOBt·H2O (1.5 equiv.), EDCI (1.4 equiv.) and *i*Pr2NEt (1.5 equiv.) at room temperature for 30 min. The reaction was quenched with *sat. aq.* NaHCO3, and the resulting mixture was extracted with EtOAc. The organic layer was washed with brine, dried (Na2SO4), filtered and concentrated *in vacuo*. The residue was purified by silica gel column chromatograph to afford products.

***General procedure E (removal of Troc, and amide formation)***

A solution of **S13** or **S14** (1.0 equiv.) in MeOH (1 mL) was treated with NH4Cl (30 equiv.) and Zn powder (activated with HCl, 16 equiv.) at rt for 2.5~5 h. The reaction mixture was filtered off through a Celite pad, and the filtrate was concentrated *in vacuo*. The residue was partitioned between CHCl3 and *sat. aq.* NaHCO3/brine (1/1), and the aqueous layer was re-extracted with CHCl3. The combined organic layer was dried (Na2SO4), filtered and concentrated *in vacuo*. A solution of the crude amine and carboxylic acid (1.5 equiv.) in CH2Cl2 (1 mL) was treated with HOBt·H2O (1.5 equiv.), EDCI (1.4 equiv.) and *i*Pr2NEt (1.5 equiv.) at room temperature for 5 h. Additional carboxylic acid, EDCI, and HOBt·H2O were added to the reaction mixture. The reaction was quenched with *sat. aq.* NaHCO3, and the resulting mixture was extracted with EtOAc. The organic layer was washed with brine, dried (Na2SO4), filtered and concentrated *in vacuo*. The residue was purified by silica gel column chromatography to afford products.

Protected *p*Lys amide (**S15**)

According to general procedure D, **S11** (11.5 mg, 13.4 μmol) and palmitoyl-Lys(Boc)-OH (9.7 mg, 20.1 μmol) were used to afford **S15** (10.8 mg, 62% over 2 steps) as a white solid after silica gel column chromatography (ϕ0.8×8 cm, MeOH/CHCl3 = 1% → 2%).

1H NMR (DMSO-*d*6, 400 MHz) δ 11.39 (s, 1H, N*H*-3), 8.31 (t, 1H, amide-N*H*, *J* = 5.9 Hz), 7.86 (d, 1H, Lys-α-N*H*, *J* = 8.2 Hz), 7.78 (d, 1H, H-6, *J*6,5 = 7.7 Hz), 7.23 (d, 2H, Ar, *J* = 8.2 Hz), 7.14 (d, 2H, Ar, *J* = 8.2 Hz), 6.72 (t, 1H, Lys-ε-N*H*, *J* = 5.4 Hz), 6.66 (t, 1H, N*H*-5'', *J* = 6.1 Hz), 5.77 (d, 1H, H-1', *J*1',2' = 1.8 Hz), 5.59 (d, 1H, H-5, *J*5,6 = 7.7 Hz), 5.11 (dd, 1H, H-2', *J*2',3' = 6.4, *J*2',1' = 1.8 Hz), 4.94 (s, 1H, H-1''), 4.69 (dd, 1H, H-3', *J*3',2' = 6.4, *J*3',4' = 4.5 Hz), 4.54-4.49 (m, 2H, H-2'', H-3''), 4.40 (dd, 1H, H-4', *J*4',5' = 8.6, *J*4',3' = 4.5 Hz), 4.29-4.17 (m, 3H, Lys-α-C*H*, ArC*H*2), 4.11 (br d, 1H, H-5', *J* = 8.6 Hz), 3.92 (dd, 1H, H-4'', *J* = 8.2, *J* = 5.9 Hz), 3.81 (dd, 1H, ArC*H*2, *J*gem = 12.4, *J* = 2.9 Hz), 3.50 (dd, 1H, ArC*H*2, *J*gem = 12.4, *J* = 7.0 Hz), 3.20 (d, 1H, H-6', *J* = 12.2 Hz), 3.03-2.92 (m, 1H, H-5''), 2.90-2.82 (m, 3H, H-5'', Lys-ε-C*H*2), 2.15-1.99 (m, 3H, NH*-*6', acyl-α-C*H*2), 1.66-1.14 (m, 69H, Lys-β-C*H*2, Lys-γ-C*H*2, Lys-δ-C*H*2, isopropylidene-C*H*3×2, pentylidene-C*H*2×2, *t*Bu, acyl C*H*2), 0.85 (t, 3H, C*H*3, *J* = 6.8 Hz), 0.72 (t, 3H, C*H*3, *J* = 7.3 Hz), 0.68 (t, 3H, C*H*3, *J* = 7.3 Hz); 13C NMR (DMSO-*d*6, 100 MHz) δ 172.2, 171.9, 171.3, 163.4, 155.5, 155.5, 150.4, 143.9, 138.4, 137.9, 127.9, 126.9, 115.0, 113.3, 111.4, 101.6, 93.3, 86.7, 85.6, 85.3, 83.9, 81.6, 81.5, 81.2, 77.9, 77.3, 52.4, 51.2, 42.7, 41.7, 35.2, 31.7, 31.3, 29.2, 29.0, 29.0, 29.0, 28.8, 28.7, 28.6, 28.3, 28.1, 28.0, 27.8, 27.6, 27.1, 25.3, 22.8, 22.1, 13.9, 8.2, 7.1; ESIMS-HR *m*/*z*: [M+H]+ calcd. for C68H112N7O17 1298.8109, found 1298.8118; [α]25D -3.27 (*c* 0.50, CHCl3).

Protected *p*Arg amide (**S17**)

According to general procedure D, **S11** (20.0 mg, 23.3 μmol) and palmitoyl-Arg(Pbf)-OH (23.3 mg, 35.0 μmol) were used to afford **S17** (27.5 mg, 80% over 2 steps) as a white solid after silica gel column chromatography (ϕ0.8×8 cm, MeOH/CHCl3 = 1% → 2%).

1H NMR (DMSO-*d*6, 500 MHz) δ 11.39 (d, 1H, N*H*-3, *J*NH-3,5 = 2.3 Hz), 8.32 (t, 1H, amide-N*H*, *J* = 5.7 Hz), 7.89 (d, 1H, Arg-α-N*H*, *J* = 8.0 Hz), 7.78 (d, 1H, H-6, *J*6,5 = 8.0 Hz), 7.22 (d, 2H, Ar, *J* = 8.0 Hz), 7.14 (d, 2H, Ar, *J* = 8.0 Hz), 6.65 (t, 1H, N*H*-5'', *J* = 6.0 Hz), 6.40 (br s, 1H, Arg-N*H*), 5.77 (d, 1H, H-1', *J*1',2' = 1.7 Hz), 5.59 (dd, 1H, H-5, *J*5,6 = 8.0, *J*6,NH-3 = 2.3 Hz), 5.10 (dd, 1H, H-2', *J*2',3' = 6.3, *J*2',1' = 1.7 Hz), 4.94 (s, 1H, H-1''), 4.69 (t, 1H, H-3', *J* = 5.2 Hz), 4.53-4.49 (m, 2H, H-2'', H-3''), 4.40 (dd, 1H, H-4', *J*4',5' = 9.2, *J*4',3' = 4.6 Hz), 4.31-4.14 (m, 3H, Arg-α-C*H*, ArC*H*2), 4.11 (br d, 1H, H-5', *J* = 10.3 Hz), 3.92 (dd, 1H, H-4'', *J* = 8.6, *J* = 5.7 Hz), 3.80 (br d, 1H, ArC*H*2, *J*= 11.5 Hz), 3.50 (dd, 1H, ArC*H*2, *J*gem = 13.8, *J* = 6.3 Hz), 3.21 (d, 1H, H-6', *J* = 10.9 Hz), 3.05-2.94 (m, 5H, H-5'', Arg-δ-C*H*2, Pbf), 2.99-2.83 (m, 1H, H-5''), 2.48 (s, 3H, Pbf), 2.42 (s, 3H, Pbf), 2.10 (t, 2H, acyl-α-C*H*2, *J* = 7.2 Hz), 2.09-1.98 (br s, 1H, N*H*-6'), 2.00 (s, 3H, Pbf), 1.68-1.18 (m, 64H, Arg-β-C*H*2, Arg-γ-C*H*2, Pbf CH3, isopropylidene-C*H*3×2, pentylidene-C*H*2×2, *t*Bu, acyl C*H*2), 0.85 (t, 3H, C*H*3, *J* = 6.9 Hz), 0.72 (t, 3H, C*H*3, *J* = 7.5 Hz), 0.69 (t, 3H, C*H*3, *J* = 7.5 Hz); 13C NMR (DMSO-*d*6, 100 MHz) δ 172.3, 171.7, 171.4, 165.2, 163.4, 157.5, 156.1, 155.5, 150.5, 144.0, 138.5, 137.9, 137.3, 134.2, 131.4, 127.9, 127.0, 124.3, 116.3, 115.0, 113.4, 111.4, 101.7, 93.4, 86.8, 86.3, 85.7, 85.4, 83.9, 81.6, 81.5, 81.2, 79.2, 77.9, 67.0, 60.9, 52.2, 51.3, 42.7, 42.5, 41.8, 35.2, 31.3, 29.5, 29.1, 29.1, 29.0, 28.9, 28.8, 28.7, 28.3, 28.1, 27.8, 27.6, 27.1, 25.3, 22.1, 19.0, 17.6, 14.0, 12.3, 8.3, 7.1; ESIMS-HR *m*/*z*: [M+H]+ calcd. for C76H120N9O18S 1478.8467, found 1478.8527; [α]22D -11.44 (*c* 0.59, CHCl3).

Protected *m*Lys amide (**S16**)

According to general procedure D, **S12** (22.0 mg, 25.6 μmol) and palmitoyl-Lys(Boc)-OH (18.6 mg, 38.4 μmol) were used to afford **S16** (23.2 mg, 70% over 2 steps) as a white solid after silica gel column chromatography (ϕ1.1×7 cm, MeOH/CHCl3 = 1% → 2%).

1H NMR (DMSO-*d*6, 500 MHz) δ 11.38 (s, 1H, N*H*-3), 8.30 (t, 1H, amide-N*H*, *J* = 6.0 Hz), 7.85 (d, 1H, Lys-α-N*H*, *J* = 8.0 Hz), 7.77 (d, 1H, H-6, *J*6,5 = 8.0 Hz), 7.25-7.20 (m, 2H, Ar), 7.12 (s, 1H, Ar), 7.09 (d, 1H, Ar, *J* = 6.9 Hz), 6.70 (t, 1H, Lys-ε-N*H*, *J* = 5.2 Hz), 6.66 (t, 1H, N*H*-5'', *J* = 6.0 Hz), 5.77 (d, 1H, H-1', *J*1',2' = 1.7 Hz), 5.59 (d, 1H, H-5, *J*5,6 = 8.0 Hz), 5.11 (dd, 1H, H-2', *J*2',3' = 6.3, *J*2',1' = 1.7 Hz), 4.95 (s, 1H, H-1''), 4.71 (dd, 1H, H-3', *J*3',2' = 6.3, *J*3',4' = 4.6 Hz), 4.54-4.51 (m, 2H, H-2'', H-3''), 4.40 (dd, 1H, H-4', *J*4',5' = 8.9, *J*4',3' = 4.6 Hz), 4.26-4.20 (m, 3H, Lys-α-C*H*, ArC*H*2), 4.12 (dd, 1H, H-5', *J*5',4' = 8.9, *J*5',6' = 1.4 Hz), 3.92 (dd, 1H, H-4'', *J* = 8.6, *J* = 5.7 Hz), 3.80 (br d, 1H, ArC*H*2, *J* = 10.3 Hz), 3.51 (dd, 1H, ArC*H*2, *J*gem = 13.5, *J* = 7.2 Hz), 3.23 (br d, 1H, H-6', *J* = 10.9 Hz), 3.00-2.95 (m, 1H, H-5''), 2.89-2.83 (m, 3H, H-5'', Lys-ε-C*H*2), 2.15-2.07 (m, 2H, acyl-α-C*H*2), 2.06-2.00 (m, 1H, N*H*-6'), 1.65-1.17 (m, 69H, Lys-β-C*H*2, Lys-γ-C*H*2, Lys-δ-C*H*2, isopropylidene-C*H*3×2, pentylidene-C*H*2×2, *t*Bu, acyl C*H*2), 0.85 (t, 3H, C*H*3, *J* = 6.9 Hz), 0.72 (t, 3H, C*H*3, *J* = 7.5 Hz), 0.68 (t, 3H, C*H*3, *J* = 7.5 Hz); 13C NMR (DMSO-*d*6, 100 MHz) δ 172.2, 171.9, 171.4, 163.4, 155.6, 150.5, 144.0, 140.0, 139.3, 128.2, 126.9, 126.4, 125.5, 115.0, 113.3, 111.4, 101.7, 93.4, 86.7, 85.7, 85.4, 83.9, 81.6, 81.5, 81.3, 77.9, 77.3, 61.1, 52.5, 51.6, 42.7, 42.0, 35.2, 31.8, 31.3, 29.2, 29.1, 28.9, 28.8, 28.7, 28.3, 28.1, 27.8, 27.1, 25.3, 22.8, 22.1, 14.0, 8.3, 7.1; ESIMS-HR *m*/*z*: [M+H]+ calcd. for C68H112N7O17 1298.8109, found 1298.8191; [α]22D -6.07 (*c* 0.51, CHCl3).

Protected *m*Arg amide (**S18**)

According to general procedure D, **S12** (22.0 mg, 25.6 μmol) and palmitoyl-Arg(Pbf)-OH (25.5 mg, 38.4 μmol) were used to afford **S18** (22.7 mg, 60% over 2 steps) as a white solid after silica gel column chromatography (ϕ1.1×7 cm, MeOH/CHCl3 = 1% → 2%).

1H NMR (DMSO-*d*6, 500 MHz) δ 11.39 (s, 1H, N*H*-3), 8.31 (t, 1H, amide-N*H*, *J* = 5.4 Hz), 7.89 (d, 1H, Arg-α-N*H*, *J* = 8.6 Hz), 7.77 (d, 1H, H-6, *J*6,5 = 8.0 Hz), 7.24-7.20 (m, 2H, Ar), 7.12 (s, 1H, Ar), 7.08 (d, 1H, Ar, *J* = 6.3 Hz), 6.66 (t, 1H, N*H*-5'', *J* = 6.0 Hz), 6.38 (br s, 1H, Arg-N*H*), 5.77 (d, 1H, H-1', *J*1',2' = 1.7 Hz), 5.60 (dd, 1H, H-5, *J*5,6 = 8.0, *J*5,3 = 1.7 Hz), 5.12 (dd, 1H, H-2', *J*2',3' = 6.3, *J*2',1' = 1.7 Hz), 4.95 (s, 1H, H-1''), 4.72 (dd, 1H, H-3', *J*3',2' = 6.3, *J*3',4' = 4.6 Hz), 4.54-4.51 (m, 2H, H-2'', H-3''), 4.41 (dd, 1H, H-4', *J*4',5' = 8.6, *J*4',3' = 4.6 Hz), 4.30-4.17 (m, 3H, Arg-α-C*H*, ArC*H*2), 4.12 (br d, 1H, H-5', *J* = 8.6 Hz), 3.92 (dd, 1H, H-4'', *J* = 8.6, *J* = 5.7 Hz), 3.81 (dd, 1H, ArC*H*2, *J*gem= 13.2, *J* = 3.4 Hz), 3.51 (dd, 1H, ArC*H*2, *J*gem = 13.2, *J* = 7.5 Hz), 3.23 (br d, 1H, H-6', *J* = 12.0 Hz), 3.04-2.95 (m, 5H, H-5'', Arg-δ-C*H*3, Pbf-C*H*2), 2.89-2.83 (m, 1H, H-5''), 2.48 (s, 3H, Pbf-C*H*3), 2.42 (s, 3H, Pbf-C*H*3), 2.10 (t, 2H, acyl-α-C*H*2, *J* = 7.2 Hz), 2.07-1.99 (m, 1H, N*H*-6'), 1.66-1.17 (m, 55H, Arg-β-C*H*2, Arg-γ-C*H*2, Pbf-C*H*3, isopropylidene-C*H*3×2, pentylidene-C*H*2×2, *t*Bu, acyl-C*H*2), 0.84 (t, 3H, C*H*3, *J* = 6.9 Hz), 0.72 (t, 3H, C*H*3, *J* = 7.5 Hz), 0.68 (t, 3H, C*H*3, *J* = 7.5 Hz); 13C NMR (DMSO-*d*6, 100 MHz) δ 172.2, 171.6, 171.3, 163.3, 157.4, 156.0, 155.5, 150.4, 143.9, 140.0, 139.1, 137.3, 134.2, 131.4, 128.2, 127.0, 126.4, 125.5, 124.3, 116.2, 115.0, 113.3, 111.4, 101.7, 93.3, 86.7, 86.2, 85.7, 85.3, 83.8, 81.6, 81.5, 81.2, 77.9, 61.1, 52.1, 51.6, 42.7, 42.5, 42.0, 35.2, 31.3, 29.0, 29.0, 28.8, 28.7, 28.3, 28.1, 27.8, 27.1, 25.3, 22.1, 18.9, 17.6, 13.9, 12.2, 8.2, 7.1; ESIMS-HR *m*/*z*: [M+H]+ calcd. for C76H120N9O18S 1478.8467, found 1478.8527; [α]22D -8.46 (*c* 0.50, CHCl3).

Protected *p*Lys anilide (**S19**)

According to general procedure E, **S13** (26.0 mg, 26.2 μmol) and palmitoyl-Lys(Boc)-OH (19.0×2 mg, 39.3×2 μmol) were used to afford **S19** (14.9 mg, 44% over 2 steps) as a white solid after silica gel column chromatography (ϕ1.1×7 cm, MeOH/CHCl3 = 0% → 1% → 2%).

1H NMR (DMSO-*d*6, 500 MHz) δ 11.39 (s, 1H, N*H*-3), 9.94 (s, 1H, amide-N*H*), 7.99 (d, 1H, Lys-α-N*H*, *J* = 7.5 Hz), 7.77 (d, 1H, H-6, *J*6,5 = 8.0 Hz), 7.52 (d, 2H, Ar, *J* = 8.6 Hz), 7.21 (d, 2H, Ar, *J* = 8.6 Hz), 6.73 (t, 1H, Lys-ε-N*H*, *J* = 5.7 Hz), 6.64 (t, 1H, N*H*-5'', *J* = 6.3 Hz), 5.76 (d, 1H, H-1', *J*1',2' = 1.7 Hz), 5.59 (dd, 1H, H-5, *J*5,6 = 8.0, *J*5,3 = 2.3 Hz), 5.11 (dd, 1H, H-2', *J*2',3' = 6.3, *J*2',1' = 1.7 Hz), 4.93 (s, 1H, H-1''), 4.64 (dd, 1H, H-3', *J*3',2' = 6.3, *J*3',4' = 4.6 Hz), 4.54-4.49 (m, 2H, H-2'', H-3''), 4.40-4.33 (m, 2H, H-4', Lys-α-C*H*), 4.10 (br d, 1H, H-5', *J*5',4' = 9.7 Hz), 3.92 (dd, 1H, H-4'', *J* = 7.7, *J* = 6.0 Hz), 3.80 (br d, 1H, ArC*H*2, *J* = 12.6 Hz), 3.47 (br d, 1H, ArC*H*2, *J*gem = 12.6 Hz), 3.16 (br d, 1H, H-6', *J* = 10.3 Hz), 3.01-2.96 (m, 1H, H-5''), 2.91-2.84 (m, 3H, H-5'', Lys-ε-C*H*2), 2.15-2.04 (m, 3H, N*H*-6', acyl-α-C*H*2), 1.68-1.15 (m, 69H, Lys-β-C*H*2, Lys-γ-C*H*2, Lys-δ-C*H*2, isopropylidene-C*H*3×2, pentylidene-C*H*2×2, *t*Bu, acyl C*H*2), 0.85 (t, 3H, C*H*3, *J* = 6.9 Hz), 0.71 (t, 3H, C*H*3, *J* = 7.7 Hz), 0.68 (t, 3H, C*H*3, *J* = 7.7 Hz); 13C NMR (DMSO-*d*6, 100 MHz) δ 172.3, 171.4, 170.9, 163.4, 155.6, 155.5, 150.5, 144.0, 137.8, 134.6, 128.4, 119.0, 115.0, 113.3, 111.4, 101.6, 93.5, 86.8, 85.7, 85.4, 83.9, 81.6, 81.2, 77.9, 77.3, 60.4, 53.2, 50.9, 42.7, 35.1, 31.9, 31.3, 29.3, 29.1, 29.0, 29.0, 28.8, 28.8, 28.6, 28.3, 28.1, 27.8, 27.6, 27.0, 25.3, 25.3, 22.8, 22.1, 14.0, 8.3, 7.1; ESIMS-HR *m*/*z*: [M+H]+ calcd. for C67H110N7O17 1284.7953, found 1284.7983; [α]25D -5.01 (*c* 0.39, CHCl3).

Protected *p*Arg anilide (**S21**)

According to general procedure E, **S13** (26.0 mg, 26.2 μmol) and palmitoyl-Arg(Pbf)-OH (26.1×2 mg, 39.3×2 μmol) were used to afford **S21** (24.0 mg, 63% over 2 steps) as a white solid after silica gel column chromatography (ϕ1.1×8 cm, MeOH/CHCl3 = 1% → 2%).

1H NMR (DMSO-*d*6, 500 MHz) δ 11.39 (s, 1H, N*H*-3), 9.97 (s, 1H, amide-N*H*), 8.03 (d, 1H, Arg-α-N*H*, *J* = 8.0 Hz), 7.78 (d, 1H, H-6, *J*6,5 = 8.0 Hz), 7.53 (d, 2H, Ar, *J* = 8.0 Hz), 7.21 (d, 2H, Ar, *J* = 8.0 Hz), 6.64 (t, 1H, N*H*-5'', *J* = 5.7 Hz), 6.44-6.32 (br s, 1H, Arg-N*H*), 5.76 (d, 1H, H-1', *J*1',2' = 1.7 Hz), 5.59 (dd, 1H, H-5, *J*5,6 = 8.0, *J*5,3 = 1.7 Hz), 5.11 (dd, 1H, H-2', *J*2',3' = 6.3, *J*2',1' = 1.7 Hz), 4.94 (s, 1H, H-1''), 4.65 (dd, 1H, H-3', *J*3',2' = 6.3, *J*3',4' = 4.6 Hz), 4.54-4.49 (m, 2H, H-2'', H-3''), 4.41-4.36 (m, 2H, H-4', Arg-α-C*H*), 4.10 (br d, 1H, H-5', *J*5',4' = 9.2 Hz), 3.92 (dd, 1H, H-4'', *J* = 8.0, *J* = 5.7 Hz), 3.80 (br d, 1H, ArC*H*2, *J* = 10.3 Hz), 3.51-3.45 (m, 1H, ArC*H*2), 3.17 (br d, 1H, H-6', *J* = 11.5 Hz), 3.07-2.83 (m, 6H, H-5'', Arg-δ-C*H*2, Pbf-C*H*2), 2.46 (s, 3H, Pbf-C*H*3), 2.41 (s, 3H, Pbf-C*H*3), 2.12 (t, 2H, acyl-α-C*H*2, *J* = 7.2 Hz), 2.13-2.03 (m, 1H, N*H*-6'), 1.98 (s, 3H, Pbf-C*H*3), 1.69-1.15 (m, 64H, Arg-β-C*H*2, Arg-γ-C*H*2, isopropylidene-C*H*3×2, pentylidene-C*H*2×2, *t*Bu, acyl C*H*2, Pbf-C*H*3), 0.85 (t, 3H, C*H*3, *J* = 6.9 Hz), 0.71 (t, 3H, C*H*3, *J* = 7.5 Hz), 0.68 (t, 3H, C*H*3, *J* = 7.5 Hz); 13C NMR (DMSO-*d*6, 100 MHz) δ 172.4, 171.4, 170.6, 163.4, 157.5, 156.1, 155.5, 150.5, 144.0, 137.7, 137.3, 134.7, 134.2, 131.5, 128.4, 124.3, 119.0, 116.3, 115.0, 113.3, 111.4, 101.7, 93.5, 86.8, 86.3, 85.7, 85.4, 83.9, 81.6, 81.2, 77.9, 60.5, 52.9, 50.9, 42.7, 42.5, 35.1, 31.3, 29.6, 29.1, 29.1, 28.9, 28.8, 28.7, 28.3, 28.2, 27.9, 27.0, 25.3, 25.3, 22.1, 19.0, 17.6, 13.3, 12.3, 8.3, 7.1; ESIMS-HR *m*/*z*: [M+H]+ calcd. for C75H118N9O18S 1486.8130, found 1464.8394; [α]24D -11.15 (*c* 0.67, CHCl3).

Protected *m*Lys anilide (**S20**)

According to general procedure E, **S14** (26.0 mg, 26.2 μmol) and palmitoyl-Lys(Boc)-OH (19.0×2 mg, 39.3×2 μmol) were used to afford **S20** (10.1 mg, 30% over 2 steps) as a white solid after silica gel column chromatography (ϕ1.1×7 cm, MeOH/CHCl3 = 0% → 1% → 2%, and preparative TLC MeOH/CHCl3 = 4%).

1H NMR (DMSO-*d*6, 500 MHz) δ 11.39 (s, 1H, N*H*-3), 9.94 (s, 1H, amide-N*H*), 7.98 (d, 1H, Lys-α-N*H*, *J* = 8.0 Hz), 7.77 (d, 1H, H-6, *J*6,5 = 8.6 Hz), 7.51-7.47 (m, 2H, Ar), 7.21 (t, 1H, Ar, *J* = 7.7 Hz), 7.01 (d, 1H, Ar, *J* = 7.5 Hz), 6.74 (t, 1H, Lys-α-N*H*, *J* = 5.5 Hz), 6.64 (t, 1H, N*H*-5'', *J* = 5.7 Hz), 5.77 (br s, 1H, H-1'), 5.59 (d, 1H, H-5, *J*5,6 = 8.6 Hz), 5.09 (br d, 1H, H-2', *J* = 6.3 Hz), 4.96 (s, 1H, H-1''), 4.69 (br t, 1H, H-3', *J* = 5.2 Hz), 4.55-4.49 (m, 2H, H-2'', H-3''), 4.40-4.33 (m, 2H, H-4', Lys-α-C*H*), 4.10 (br d, 1H, H-5', *J*5',4' = 9.2 Hz), 3.92 (dd, 1H, H-4'', *J* = 8.3, *J* = 6.0 Hz), 3.76 (br d, 1H, ArC*H*2, *J* = 12.0 Hz), 3.51-3.44 (m, 1H, ArC*H*2), 3.20 (br d, 1H, H-6', *J* = 10.3 Hz), 3.02-2.96 (m, 1H, H-5''), 2.91-2.81 (m, 3H, H-5'', Lys-ε-C*H*2), 2.18-2.07 (m, 2H, acyl-α-C*H*2), 2.07-2.00 (m, 1H, N*H*-6'), 1.68-1.15 (m, 69H, Lys-β-C*H*2, Lys-γ-C*H*2, Lys-δ-C*H*2, isopropylidene-C*H*3×2, pentylidene-C*H*2×2, *t*Bu, acyl C*H*2), 0.85 (t, 3H, C*H*3, *J* = 6.8 Hz), 0.71 (t, 3H, C*H*3, *J* = 7.5 Hz), 0.68 (t, 3H, C*H*3, *J* = 7.5 Hz); 13C NMR (DMSO-*d*6, 100 MHz) δ 172.3, 171.4, 170.9, 163.3, 155.5, 155.5, 150.4, 143.8, 140.5, 138.9, 128.5, 123.1, 119.0, 117.8, 115.0, 113.4, 111.3, 101.7, 93.1, 86.5, 85.6, 85.3, 83.8, 81.6, 81.4, 81.2, 81.1, 77.9, 77.3, 60.9, 53.2, 51.9, 42.7, 35.1, 31.8, 31.3, 29.3, 29.0, 29.0, 28.8, 28.7, 28.6, 28.2, 28.1, 27.8, 27.6, 27.0, 25.3, 22.8, 22.1, 13.9, 8.2, 7.1; ESIMS-HR *m*/*z*: [M+H]+ calcd. for C67H110N7O17 1284.7953, found 1284.8058; [α]24D +0.62 (*c* 0.60, CHCl3).

Protected *m*Arg anilide (**S21**)

According to general procedure E, **S14** (26.0 mg, 26.2 μmol) and palmitoyl-Arg(Pbf)-OH (26.1×2 mg, 39.3×2 μmol) were used to afford **S21** (21.3 mg, 55% over 2 steps) as a white solid after silica gel column chromatography (ϕ1.1×8 cm, MeOH/CHCl3 = 1% → 2% → 3%).

1H NMR (DMSO-*d*6, 500 MHz) δ 11.39 (d, 1H, N*H*-3, *J* = 1.7 Hz), 9.97 (s, 1H, amide-N*H*), 8.01 (d, 1H, Arg-α-N*H*, *J* = 7.5 Hz), 7.77 (d, 1H, H-6, *J*6,5 = 8.0 Hz), 7.52-7.48 (m, 2H, Ar), 7.22 (t, 1H, Ar, *J* = 7.5 Hz), 7.02 (d, 1H, Ar, *J* = 7.5 Hz), 6.64 (t, 1H, N*H*-5'', *J* = 5.6 Hz), 6.43-6.31 (br s, 1H, Arg-N*H*), 5.77 (br s, 1H, H-1'), 5.59 (dd, 1H, H-5, *J*5,6 = 8.0, *J*5,3 = 1.7 Hz), 5.09 (br d, 1H, H-2', *J* = 6.3 Hz), 4.96 (s, 1H, H-1''), 4.69 (br t, 1H, H-3', *J* = 4.8 Hz), 4.54-4.49 (m, 2H, H-2'', H-3''), 4.42-4.37 (m, 2H, H-4', Arg-α-C*H*), 4.11 (br d, 1H, H-5', *J*5',4' = 8.6 Hz), 3.92 (dd, 1H, H-4'', *J* = 8.3, *J* = 5.4 Hz), 3.77 (br d, 1H, ArC*H*2, *J* = 11.5 Hz), 3.51-3.45 (m, 1H, ArC*H*2), 3.20 (br d, 1H, H-6', *J* = 11.5 Hz), 3.07-2.91 (m, 5H, H-5'', Arg-δ-C*H*2, Pbf-C*H*2), 2.88-2.81 (m, 1H, H-5''), 2.46 (s, 3H, Pbf-C*H*3), 2.41 (s, 3H, Pbf-C*H*3), 2.12 (t, 2H, acyl-α-C*H*2, *J* = 7.5 Hz), 2.08-1.96 (m, 1H, N*H*-6'), 1.98 (s, 3H, Pbf-C*H*3), 1.70-1.17 (m, 64H, Arg-β-C*H*2, Arg-γ-C*H*2, isopropylidene-C*H*3×2, pentylidene-C*H*2×2, *t*Bu, acyl C*H*2, Pbf-C*H*3), 0.85 (t, 3H, C*H*3, *J* = 6.9 Hz), 0.71 (t, 3H, C*H*3, *J* = 7.2 Hz), 0.69 (t, 3H, C*H*3, *J* = 7.2 Hz); 13C NMR (DMSO-*d*6, 100 MHz) δ 172.4, 171.4, 170.7, 163.4, 157.5, 156.1, 155.5, 150.5, 143.9, 140.6, 138.9, 137.3, 134.2, 131.4, 128.5, 124.3, 123.1, 119.0, 117.8, 116.3, 115.0, 113.4, 111.3, 101.7, 93.1, 93.0, 86.5, 86.3, 85.6, 85.3, 83.9, 81.6, 81.3, 77.9, 60.9, 52.9, 51.9, 42.7, 42.5, 35.1, 31.3, 29.6, 29.1, 29.0, 28.8, 28.7, 28.7, 28.3, 28.1, 27.8, 27.1, 25.3, 22.1, 19.0, 17.6, 14.0, 12.3, 8.3, 7.1; ESIMS-HR *m*/*z*: [M+H]+ calcd. for C75H118N9O18S 1464.8310, found 1464.8394; [α]24D -1.16 (*c* 0.43, CHCl3).

***General procedure F (deprotection)***

A solution of protected analogues was treated with 80% TFA/CH2Cl2 (1 mL) and H2O (50 μL) at room temperature for 3-5 h. The reaction mixture was concentrated *in vacuo*. The resulting solid was purified by Hi-Flash reverse-phase silica gel column chromatography (ODS-AQ 30 mm 120A; MeCN/H2O 30% to 70% gradient elution containing 0.1% TFA) to afford products.

Palmitoyl-*p*Lys-amide (**1**)

According to general procedure F, **S15** (10.0 mg, 7.70 μmol) was used to afford **1** (7.9 mg, 80%) as a white solid.

1H NMR (CD3OD, 400 MHz) δ 7.61 (d, 1H, H-6, *J*6,5 = 8.2 Hz), 7.40 (d, 2H, Ar, *J* = 8.2 Hz), 7.33 (d, 2H, Ar, *J* = 8.2 Hz), 5.73 (d, 1H, H-5, *J*5,6 = 8.2 Hz), 5.73 (d, 1H, H-1', *J*1',2' = 3.2 Hz), 5.15 (s, 1H, H-1''), 4.56 (d, 1H, H-5', *J*5',4' = 4.6 Hz), 4.47-4.31 (m, 5H, H-2', ArC*H*2, Lys-α-C*H*), 4.25 (d, 1H, ArC*H*2, *J*gem = 12.8 Hz), 4.21 (t, 1H, H-3', *J* = 6.2 Hz), 4.15 (dd, 1H, H-4', *J*4',3' = 6.9, *J*4',5' = 4.6 Hz), 4.11-4.00 (m, 3H, H-2'', H-3'', H-4''), 3.94-3.90 (br s, 1H, H-6'), 3.24-3.16 (m, 2H, H-5''), 2.96-2.86 (m, 2H, Lys-ε-C*H*2), 2.27 (t, 2H, acyl-α-C*H*2, *J* = 7.3 Hz), 1.91-1.82 (m, 1H, Lys-β-C*H*2), 1.76-1.58 (m, 5H, Lys-β-C*H*2, Lys-δ-C*H*2, acyl-β-C*H*2), 1.55-1.39 (m, 2H, Lys-γ-C*H*2), 1.38-1.25 (m, 24H, acyl-C*H*2×12), 0.90 (t, 3H, acyl-C*H*3, *J* = 6.9 Hz); 13C NMR (CD3OD, 100 MHz) δ 176.7, 174.5, 171.2, 165.9, 162.6 (q, 2*J*C,F = 36.6 Hz), 152.1, 143.6, 141.8, 131.5, 131.0, 129.1, 118.0 (q, 1*J*C,F = 291.9 Hz), 110.4, 103.4, 94.0, 86.6, 80.5, 77.3, 76.4, 73.7, 71.1, 64.3, 54.6, 52.5, 43.9, 43.6, 40.5, 36.9, 33.1, 32.4, 30.8, 30.7, 30.7, 30.5, 30.5, 30.4, 28.1, 26.9, 23.9, 23.7, 14.4; ESIMS-HR *m*/*z*: [M+H]+ calcd. for C46H76N7O13 934.5496, found 934.5477; [α]24D -1.45 (*c* 0.76, MeOH).

Palmitoyl-*m*Lys-amide (**2**)

According to general procedure F, **S16** (22.2 mg, 17.1 μmol) was used to afford **2** (18.8 mg, 86%) as a white solid.

1H NMR (CD3OD, 400 MHz) δ 7.64 (d, 1H, H-6, *J*6,5 = 8.1 Hz), 7.41-7.30 (m, 4H, Ar), 5.77 (d, 1H, H-1', *J*1',2' = 3.1 Hz), 5.72 (d, 1H, H-5, *J*5,6 = 8.1 Hz), 5.16 (s, 1H, H-1''), 4.56 (br d, 1H, H-5', *J*5',4' = 4.5 Hz), 4.46-4.26 (m, 6H, H-2', ArC*H*2×2, Lys-α-C*H*), 4.20 (dd, 1H, H-3', *J*3',4' = 7.4, *J*3',2' = 5.4 Hz), 4.16 (dd, 1H, H-4', *J*4',3' = 7.4, *J*4',5' = 4.9 Hz), 4.10-4.00 (m, 3H, H-2'', H-3'', H-4''), 3.92 (br s, 1H, H-6'), 3.25-3.16 (m, 2H, H-5''), 2.96-2.87 (m, 2H, Lys-ε-C*H*2), 2.27 (t, 2H, acyl-α-C*H*2, *J* = 7.6 Hz), 1.91-1.81 (m, 1H, Lys-β-C*H*2), 1.77-1.55 (m, 5H, Lys-β-C*H*2, Lys-δ-C*H*2, acyl-β-C*H*2), 1.55-1.38 (m, 2H, Lys-γ-C*H*2), 1.37-1.23 (m, 24H, acyl-C*H*2×12), 0.90 (t, 3H, acyl-C*H*3, *J* = 6.7 Hz); 13C NMR (CD3OD, 100 MHz) δ 176.7, 174.6, 171.2, 165.9, 162.6 (q, 2*J*C,F = 35.7 Hz), 152.1, 143.4, 141.1, 132.4, 130.4, 130.3, 130.1, 129.6, 118.0 (q, 1*J*C,F = 291.3 Hz), 110.3, 103.2, 94.0, 86.0, 80.4, 77.5, 76.4, 74.1, 73.8, 71.1, 64.0, 54.7, 52.6, 43.9, 43.7, 40.4, 36.9, 33.1, 32.3, 30.8, 30.8, 30.7, 30.5, 30.5, 30.4, 28.1, 27.0, 23.9, 23.7, 14.5; ESIMS-HR *m*/*z*: [M+H]+ calcd. for C46H76N7O13 934.5496, found 934.5477; [α]24D -2.91 (*c* 0.69, MeOH).

Palmitoyl-*p*Arg-amide (**3**)

According to general procedure F, **S**17 (26.5 mg, 17.9 μmol) was used to afford **3** (19.4 mg, 83%) as a white solid.

1H NMR (CD3OD, 400 MHz) δ 7.61 (d, 1H, H-6, *J*6,5 = 8.2 Hz), 7.40 (d, 2H, Ar, *J* = 8.2 Hz), 7.33 (d, 2H, Ar, *J* = 8.2 Hz), 5.73 (d, 1H, H-5, *J*5,6 = 8.2 Hz), 5.72 (d, 1H, H-1', *J*1',2' = 3.2 Hz), 5.15 (s, 1H, H-1''), 4.56 (d, 1H, H-5', *J*5',4' = 5.0 Hz), 4.45-4.31 (m, 5H, H-2', ArC*H*2, Arg-α-C*H*), 4.25 (d, 1H, ArC*H*2, *J*gem = 12.8 Hz), 4.21 (t, 1H, H-3', *J* = 6.2 Hz), 4.14 (dd, 1H, H-4', *J*4',3' = 6.9, *J*4',5' = 4.6 Hz), 4.11-3.99 (m, 3H, H-2'', H-3'', H-4''), 3.93 (br s, 1H, H-6'), 3.25-3.15 (m, 4H, H-5'', Arg-δ-C*H*2), 2.28 (t, 2H, acyl-α-C*H*2, *J* = 7.6 Hz), 1.93-1.85 (m, 1H, Arg-β-C*H*2), 1.75-1.57 (m, 5H, Arg-β-C*H*2, Arg-γ-C*H*2, acyl-β-C*H*2), 1.38-1.25 (m, 24H, acyl-C*H*2×12), 0.90 (t, 3H, acyl-C*H*3, *J* = 6.6 Hz); 13C NMR (CD3OD, 100 MHz) δ 176.7, 174.3, 171.2, 165.9, 162.5 (q, 2*J*C,F = 35.6 Hz), 158.7, 152.1, 143.6, 141.8, 131.5, 131.0, 129.1, 117.9 (q, 1*J*C,F = 289.0 Hz), 110.4, 103.3, 94.0, 86.5, 80.5, 77.3, 76.4, 73.7, 73.7, 71.1, 64.1, 54.4, 52.5, 43.9, 43.6, 41.9, 36.9, 33.1, 30.8, 30.7, 30.6, 30.4, 30.4, 30.2, 26.9, 26.5, 23.7, 14.4; ESIMS-HR *m*/*z*: [M+H]+ calcd. for C46H76N9O13 962.5557, found 962.5575; [α]24D -3.97 (*c* 0.73, MeOH).

Palmitoyl-*m*Arg-amide (**4**)

According to general procedure F, **S18** (21.7 mg, 14.7 μmol) was used to afford **4** (17.3 mg, 90%) as a white solid.

1H NMR (CD3OD, 400 MHz) δ 7.64 (d, 1H, H-6, *J*6,5 = 8.1 Hz), 7.40-7.32 (m, 4H, Ar), 5.76 (d, 1H, H-1', *J*1',2' = 2.7 Hz), 5.72 (d, 1H, H-5, *J*5,6 = 8.1 Hz), 5.17 (s, 1H, H-1''), 4.56 (dd, 1H, H-5', *J*5',4' = 4.9, *J*5',6' = 0.9 Hz), 4.44-4.25 (m, 6H, H-2', ArC*H*2×2, Arg-α-C*H*), 4.21 (dd, 1H, H-3', *J*3',4' = 7.2, *J*3',2' = 5.8 Hz), 4.16 (dd, 1H, H-4', *J*4',3' = 7.2, *J*4',5' = 4.9 Hz), 4.10-4.00 (m, 3H, H-2'', H-3'', H-4''), 3.92-3.90 (br s, 1H, H-6'), 3.25-3.17 (m, 4H, H-5'', Arg-δ-C*H*2), 2.28 (t, 2H, acyl-α-C*H*2, *J* = 7.6 Hz), 1.94-1.83 (m, 1H, Arg-β-C*H*2), 1.77-1.56 (m, 5H, Arg-β-C*H*2, Arg-γ-C*H*2, acyl-β-C*H*2), 1.36-1.25 (m, 24H, acyl-C*H*2×12), 0.90 (t, 3H, acyl-C*H*3, *J* = 7.0 Hz); 13C NMR (CD3OD, 100 MHz) δ 176.7, 174.4, 171.3, 165.9, 162.7 (q, 2*J*C,F = 34.7 Hz), 158.6, 152.1, 143.4, 141.1, 132.4, 130.4, 130.3, 130.1, 129.7, 117.9 (q, 1*J*C,F = 286.1 Hz), 110.3, 103.2, 94.1, 86.1, 80.4, 77.5, 76.4, 74.1, 73.8, 71.1, 64.0, 54.5, 52.6, 43.9, 43.7, 41.9, 36.9, 33.1, 30.8, 30.7, 30.6, 30.5, 30.5, 30.4, 30.2, 27.0, 26.5, 23.7, 14.4; ESIMS-HR *m*/*z*: [M+H]+ calcd. for C46H76N9O13 962.5557, found 962.5575; [α]24D -5.73 (*c* 0.70, MeOH).

Palmitoyl-*p*Lys-anilide (**5**)

According to general procedure F, **S19** (21.0 mg, 16.3 μmol) was used to afford **5** (15.0 mg, 73%) as a white solid.

1H NMR (CD3OD, 400 MHz) δ 7.64 (d, 2H, Ar, *J* = 8.5 Hz), 7.62 (d, 1H, H-6, *J*6,5 = 8.1 Hz), 7.42 (d, 2H, Ar, *J* = 8.5 Hz), 5.72 (d, 1H, H-5, *J*5,6 = 8.1 Hz), 5.71 (d, 1H, H-1', *J*1',2' = 3.1 Hz), 5.16 (s, 1H, H-1''), 4.56 (d, 1H, H-5', *J*5',4' = 4.9 Hz), 4.46 (dd, 1H, Lys-α-C*H*, *J* = 8.8, *J* = 5.6 Hz), 4.35-4.29 (m, 2H, H-2', ArC*H*2), 4.25 (d, 1H, ArC*H*2, *J*gem = 13.0 Hz), 4.21 (dd, 1H, H-3', *J*3',4' = 7.2, *J*3',2' = 5.8 Hz), 4.16 (dd, 1H, H-4', *J*4',3' = 7.2, *J*4',5' = 4.9 Hz), 4.10-3.99 (m, 3H, H-2'', H-3'', H-4''), 3.95 (br s, 1H, H-6'), 3.24-3.16 (m, 2H, H-5''), 2.94 (t, 2H, Lys-ε-C*H*2, *J* = 7.6 Hz), 2.28 (t, 2H, acyl-α-C*H*2, *J* = 7.6 Hz), 1.95-1.85 (m, 1H, Lys-β-C*H*2), 1.82-1.42 (m, 7H, Lys-β-C*H*2, Lys-γ-C*H*2, Lys-δ-C*H*2, acyl-β-C*H*2), 1.38-1.24 (m, 24H, acyl-C*H*2×12), 0.90 (t, 3H, acyl-C*H*3, *J* = 6.7 Hz); 13C NMR (CD3OD, 100 MHz) δ 176.6, 172.8, 171.1, 165.8, 162.4 (q, 2*J*C,F = 37.6 Hz), 152.1, 143.7, 141.0, 132.1, 127.6, 121.5, 110.3, 103.2, 94.4, 86.2, 80.4, 77.5, 76.3, 73.8, 73.8, 71.1, 63.8, 55.2, 52.4, 43.9, 40.5, 36.8, 33.1, 32.6, 30.8, 30.7, 30.6, 30.5, 30.4, 28.2, 26.9, 23.9, 23.7, 14.4; ESIMS-HR *m*/*z*: [M+H]+ calcd. for C45H74N7O13 920.5339, found 920.5359; [α]21D 0.52 (*c* 0.66, MeOH).

Palmitoyl-*m*Lys-anilide (**6**)

According to general procedure F, **S20** (22.4 mg, 17.4 μmol) was used to afford **6** (17.7 mg, 81%) as a white solid.

1H NMR (CD3OD, 400 MHz, containing conformers, attributed the main peak) δ 7.86 (s, 1H, Ar), 7.66 (d, 1H, H-6, *J*6,5 = 8.1 Hz), 7.47 (br d, 1H, Ar, *J* = 8.1 Hz), 7.39 (t, 1H, Ar, *J* = 7.9 Hz), 7.20 (br d, 1H, Ar, *J* = 7.6 Hz), 5.77 (d, 1H, H-1', *J*1',2' = 2.7 Hz), 5.72 (d, 1H, H-5, *J*5,6 = 8.1 Hz), 5.16 (s, 1H, H-1''), 4.57 (br d, 1H, H-5', *J* = 4.5 Hz), 4.47 (dd, 1H, Lys-α-C*H*, *J* = 9.0, *J* = 5.4 Hz), 4.39 (d, 1H, ArC*H*2, *J*gem = 13.0 Hz), 4.30-4.19 (m, 3H, H-2', H-3', ArC*H*2), 4.15 (dd, 1H, H-4', *J*4',3' = 7.2, *J*4',5' = 4.5 Hz), 4.12-4.01 (m, 3H, H-2'', H-3'', H-4''), 3.95-3.92 (m, 1H, H-6'), 3.26-3.13 (m, 2H, H-5''), 2.94 (t, 2H, Lys-ε-C*H*2, *J* = 7.0 Hz), 2.31-2.27 (m, 2H, acyl-α-C*H*2), 1.97-1.86 (m, 1H, Lys-β-C*H*2), 1.84-1.68 (m, 3H, Lys-β-C*H*2, Lys-δ-C*H*2), 1.68-1.58 (m, 2H, acyl-β-C*H*2), 1.58-1.42 (m, 2H, Lys-γ-C*H*2), 1.39-1.24 (m, 24H, acyl-C*H*2×12), 0.90 (t, 3H, acyl-C*H*3, *J* = 6.7 Hz); 13C NMR (CD3OD, 100 MHz) δ 176.6, 172.9, 171.0, 165.9, 162.2 (q, 2*J*C,F = 35.6 Hz), 152.1, 143.5, 140.3, 132.9, 130.8, 127.1, 122.9, 122.5, 117.8 (q, 1*J*C,F = 294.8 Hz), 110.5, 103.2, 94.3, 86.2, 80.5, 77.3, 76.4, 74.0, 73.7, 71.0, 64.2, 55.2, 52.7, 43.9, 40.5, 36.8, 33.1, 32.6, 30.8, 30.7, 30.6, 30.5, 30.4, 28.2, 26.9, 24.0, 23.7, 14.4;ESIMS-HR *m*/*z*: [M+H]+ calcd. for C45H73N7O13 920.5339, found 920.5359; [α]22D -4.84 (*c* 0.28, MeOH).

Palmitoyl-*p*Arg-anilide (**7**)

According to general procedure F, **S21** (23.1 mg, 15.8 μmol) was used to afford **7** (14.9 mg, 73%) as a white solid.

1H NMR (CD3OD, 400 MHz) δ 7.65 (d, 2H, Ar, *J* = 8.5 Hz), 7.62 (d, 1H, H-6, *J*6,5 = 8.1 Hz), 7.42 (d, 2H, Ar, *J* = 8.5 Hz), 5.73 (d, 1H, H-5, *J*5,6 = 8.1 Hz), 5.71 (d, 1H, H-1', *J*1',2' = 4.0 Hz), 5.16 (s, 1H, H-1''), 4.56 (br d, 1H, H-5', *J* = 4.5 Hz), 4.49 (dd, 1H, Arg-α-C*H*, *J* = 8.3, *J* = 5.6 Hz), 4.35-4.30 (m, 2H, H-2', ArC*H*2), 4.25 (d, 1H, ArC*H*2, *J*gem = 13.0 Hz), 4.21 (dd, 1H, H-3', *J*3',4' = 7.2, *J*3',2' = 5.8 Hz), 4.16 (dd, 1H, H-4', *J*4',3' = 7.2, *J*4',5' = 4.9 Hz), 4.09-4.00 (m, 3H, H-2'', H-3'', H-4''), 3.95 (br s, 1H, H-6'), 3.26-3.18 (m, 4H, H-5'', Arg-δ-C*H*2), 2.28 (t, 2H, acyl-α-C*H*2, *J* = 7.6 Hz), 1.96-1.87 (m, 1H, Arg-β-C*H*2), 1.82-1.59 (m, 5H, Arg-β-C*H*2, Arg-γ-C*H*2, acyl-β-C*H*2), 1.36-1.24 (m, 24H, acyl-C*H*2×12), 0.90 (t, 3H, acyl-C*H*3, *J* = 6.7 Hz); 13C NMR (CD3OD, 100 MHz) δ 176.6, 172.6, 171.1, 165.9, 162.4 (q, 2*J*C,F = 37.6 Hz), 158.6, 152.1, 143.7, 140.9, 132.2, 127.6, 121.5, 117.8 (q, 1*J*C,F = 291.9 Hz), 110.3, 103.2, 94.4, 86.2, 80.4, 77.5, 76.3, 73.8, 73.7, 71.1, 63.8, 55.0, 52.4, 43.9, 42.0, 36.8, 33.1, 30.8, 30.6, 30.5, 30.4, 28.3, 26.9, 26.4, 23.7, 14.4; ESIMS-HR *m*/*z*: [M+H]+ calcd. for C45H74N9O13 948.5401, found 948.5388; [α]21D -0.43 (*c* 0.69, MeOH).

Palmitoyl-*m*Arg-anilide (**8**)

According to general procedure F, **S22** (22.1 mg, 15.1 μmol) was used to afford **8** (13.5 mg, 69%) as a white solid.

1H NMR (CD3OD, 400 MHz, containing conformers, attributed the main peak) δ 7.88 (br s, 1H, Ar), 7.66 (d, 1H, H-6, *J*6,5 = 8.1 Hz), 7.46 (br d, 1H, Ar, *J* = 9.0 Hz), 7.39 (t, 1H, Ar, *J* = 7.6 Hz), 7.20 (br d, 1H, Ar, *J* = 7.6 Hz), 5.76 (d, 1H, H-1', *J*1',2' = 2.7 Hz), 5.72 (d, 1H, H-5, *J*5,6 = 8.1 Hz), 5.16 (s, 1H, H-1''), 4.58 (br d, 1H, H-5', *J* = 4.5 Hz), 4.50 (dd, 1H, Arg-α-C*H*, *J* = 8.1, *J* = 5.8 Hz), 4.40 (d, 1H, ArC*H*2, *J*gem = 13.0 Hz), 4.31-4.20 (m, 3H, H-2', H-3', ArC*H*2), 4.15 (dd, 1H, H-4', *J*4',3' = 7.6, *J*4',5' = 4.5 Hz), 4.12-4.00 (m, 4H, H-6', H-2'', H-3'', H-4''), 3.28-3.19 (m, 4H, H-5'', Arg-δ-C*H*2), 2.33-2.28 (m, 2H, acyl-α-C*H*2), 1.98-1.87 (m, 1H, Arg-β-C*H*2), 1.85-1.58 (m, 5H, Arg-β-C*H*2, Arg-δ-C*H*2, acyl-β-C*H*2), 1.38-1.24 (m, 24H, acyl-C*H*2×12), 0.90 (t, 3H, acyl-C*H*3, *J* = 7.0 Hz); 13C NMR (CD3OD, 100 MHz) δ 176.7, 172.6, 171.0, 165.9, 162.2 (q, 2*J*C,F = 36.6 Hz), 158.6, 152.1, 143.4, 140.3, 132.9, 130.8, 127.1, 122.9, 122.5, 117.7 (q, 1*J*C,F = 290.0 Hz), 110.5, 103.2, 94.3, 86.2, 80.5, 77.2, 76.4, 74.1, 73.7, 71.0, 64.3, 55.0, 52.7, 43.9, 42.0, 36.8, 33.1, 30.8, 30.8, 30.6, 30.5, 30.4, 26.9, 26.5, 23.7, 14.4; ESIMS-HR *m*/*z*: [M+H]+ calcd. for C45H74N9O13 948.5401, found 948.5388; [α]22D -5.84 (*c* 0.24, MeOH).

**4. References**

1. Dumue, F.; Contal, E.; Wantz, G.; Phan, T. N. T.; Bertin, D.; Gigmes, D. *Chem. Eur. J.* **2013**, *19*, 1373-1384. Immobilization of styrene-substituted 1,3,4-oxadiazoles into thermoreversible luminescent organogels and their unexpected photocatalyzed rearrangement.
2. Zhu, Y.; Wu, J.; Li, C.; Zhu, J.; Hou, J.; Li, C.; Jiang, Li, Z. *Cryst. Growth Des.* **2007**, *7*, 1490-1496. F···H-N and MeO···H-N hydrogen-bonding in the solid states of aromatic amides and hydrazides: a comparison study.
3. Hwang, J. Y.; Choi, H.; Lee, D.; Gong, Y. *J. Comb. Chem.* **2005**, *7*, 816.819. Solid-phase synthesis of 1,3,4-oxadiazole and 1,3,4-thiadiazole derivatives via selective, reagent-based cyclization of acyldithiocarbazate resins.
4. Husain, A.; Ahmad, A.; Alam, M. M.; Ajmal, M.; Ahuja, P. *Eur. J. Med. Chem.* **2009**, *44* 3798-3804. Fenbufen based 3-[5-(substituted aryl)-1,3,4-oxadiazol-2-yl]-1-(biphenyl-4-yl)propan-1-ones as safer anti-inflammatory and analgesic agents.
5. Ashiq, U.; Jamal, R. A.; Mahroof-Tahir, M.; Maqsood, Z. T.; Khan, K. M.; Omer, I. Choudhary, M. I. *J. Enzyme Inhib. Med. Chem.* **2009**, *24*, 1336-1343. Enzyme inhibition, radical scavenging, and spectroscopic studies of vanadium(IV)-hydrazide complexes.
6. Ono, M.; Kobayashi, T.; Yamazaki, R.; Haibara, H.; Nishiyama, Y.; Hohashi, A.; Nishiyama, H.; Kurita, A.; Matsuzaki, T.; Kono, K.; Izumi, H. *Jpn. Kokai Tokkyo Koho* **2016**, JP2016124812 B2 20160711, Preparation of heteroaryl compounds as ZNF143 inhibitors.
7. Zender, M.; Klein, T.; Henn, C.; Kirsch, B.; Maurer, C. K.; Kail, D.; Ritter, C.; Dolezal, O.; Steinbach, A.; Hartmann, R. W. *J. Med. Chem.* **2013**, *56*, 6761-6774. Discovery and biophysical characterization of 2-amino-oxadiazoles as novel antagonists of PqsR, an important regulator of Pseudomonas aeruginosa virulence.
8. Barrett, D. G.; Deaton, D. N.; McFadyen, R. B.; Miller, A. B.; Ray, J. A.; Tavares, F. X.; Zhou, H. *PCT Int. Appl*. **2003**, WO03013518 A1 20030220, Preparation of α-ketoamide derivatives as cathepsin K inhibitors useful against bone disorders such as osteoporosis.
9. Hou, J.; Shao, X.; Chen, G.; Zhou, Y.; Jiang, X.; Li, Z. *J. Am. Chem. Soc.* **2004**, *126*, 12386-12394. Hydrogen bonded oligo-hydrazide foldamers and their recognition for saccharides.
10. Ashiq, U.; Ara, R.; Mahroof-Tahir, M.; Maqsood, Z. T.; Khan, K. M.; Khan, S. N.; Siddiqui, H.; Choudhary, M. I. *Chem. Biodivers.* **2008**, *5*, 82-92. Synthesis, spectroscopy, and biological properties of vanadium(IV)-hydrazide complexes.
11. Yu, D. D.; Forman, B. M. *Bioorg. Med. Chem. Lett.* **2005**, *15*, 1311-1313. Identification of an agonist ligand for estrogen-related receptors ERRβ/γ.
12. Khan, K. M.; Shujaat, S.; Rahat, S.; Hayat, S.; Atta-ur-Rahman; Choudhary, M. I. *Chem. Pharm. Bull.* **2002**, *50*, 1443-1446. β-*N*-Cyanoethyl acyl hydrazide derivatives: a new class of β- glucuronidase inhibitors.
13. Xue, S.; Ma, X. *Faming Zhuanli Shenqing* **2011**, CN102070629 A 20110525, Preparation of neonicotinoid clothianidin analogs as insecticides.
14. Ji, Z.; Wu, Y.; Wu, F. *Chem. Lett.* **2006**, *35*, 950-951. A ratiometric fluorescence sensor for zinc in neutral solution based on thiourea receptor.
15. Kim, Y.; Koh, M.; Kim, D.; Choi, H.; Park, S. B. *J. Comb. Chem.* **2009**, *11*, 928-937. Efficient discovery of selective small molecule agonists of estrogen-related receptor γ using combinatorial approach.
16. Yelamaggad, C. V.; Achalkumar, A. S.; Rao, D. S. Shankar; Prasad, S. K. *J. Org. Chem.* **2009**, *74*, 3168-3171. Luminescent, liquid crystalline tris(N-salcylideneaniline)s: synthesis and characterization.
17. Lu, T.; Lu, S.; Kong, K.; Liu, H.; Chen, Y.; Gao, Y.; Zhang, L.; Sun, S. *Faming Zhuanli Shenqing* **2011**, CN 102174035 A 20110907, Aromatic diacylhydrazines as PLK1 inhibitors and their preparation, pharmaceutical compositions and use in the treatment of cancers.
18. Klingele, M. H.; Brooker, S. *Eur. J. Org. Chem.* **2004**, *16*, 3422-3434. From N-substituted thioamides to symmetrical and unsymmetrical 3,4,5-trisubstituted 4H-1,2,4-triazoles: synthesis and characterisation of new chelating ligands.
19. Zamani, K.; Faghihi, K.; Tofighi, T.; Shariatzadeh, M. R. *Turk. J. Chem.* **2004**, *28*, 95-100. Synthesis and antimicrobial activity of some pyridyl and naphthyl substituted 1,2,4-triazole and 1,3, 4-thiadiazole derivatives.
20. Bhutani, H.; Singh, S.; Vir, S.; Bhutani, K. K.; Kumar, R.; Chakraborti, A. K.; Jindal, K. C. *J. Pharm. Biomed. Anal.* **2007**, *43*, 1213-1220. LC and LC-MS study of stress decomposition behaviour of isoniazid and establishment of validated stability-indicating assay method.
21. Mugherli, L.; Burchak, O. N.; Balakireva, L. A.; Thomas, A.; Chatelain, F.; Balakirev, M. Y. *Angew. Chem. Int. Ed.* **2009**, *48*, 7639-7644. In situ assembly and screening of enzyme inhibitors with surfacetension microarrays.
22. Xie, J.; Zhu, X.; Huang, M.; Meng, F.; Chen, W.; Wan, Y. *Eur. J. Org. Chem.* **2010**, *17*, 3219-3223. Pyrrole-2-carbohydrazides as ligands for Cu-catalyzed amination of aryl halides with amines in pure water.
23. Quesnel, J. S.; Kayser, L. V.; Fabrikant, A.; Arndtsen, B. A. *Chem. Eur. J.* **2015**, *21*, 9550-9555. Acid chloride synthesis by the palladium-catalyzed chlorocarbonylation of aryl bromides.
24. Brown, S. D.; Coburn, C. A.; Kharenko, O. *PCT Int. Appl.* **2016**, WO 2016092375 A1 20160616, Preparation of substituted imidazolyl triazoles as BET protein inhibitors via binding to bromodomains useful in therapy.
25. Ameryckx, A.; Thabault, L.; Pochet, L.; Leimanis, S.; Poupaert, J. H.; Wouters, J.; Joris, B.; Bambeke, F. V.; Frédérick, R. *Eur. J. Med. Chem.* **2018**, *159*, 324-338. 1-(2-Hydroxybenzoyl)-thiosemicarbazides are promising antimicrobial agents targeting D-alanine-D-alanine ligase in bacterio.
26. Kubo, Y.; Aotake, T.; Yakushiji, H.; Yamamoto, T. *Jpn. Kokai Tokkyo Koho* **2018**, JP 2018123093 A 20180809, Dibenzo pyrromethene boron chelate compound, the near infrared light absorbing dye, a photoelectric converter, a near-infrared light sensor and an image sensor.
27. Taha, M.; Sultan, S.; Imran, S.; Rahim, F.; Zaman, K.; Wadood, A.; Rehman, A.U.; Uddin, A.; Khan, K. M. *Bioorg. Med. Chem.* **2019**, *27*, 4081-4088. Synthesis of quinoline derivatives as diabetic II inhibitors and molecular docking studies.
28. Hajimahdi, Z.; Zabihollahi, R.; Aghasadeghi, M. R.; Zarghi, A. *Drug Res.* **2013**, *63*, 192-197. Design, synthesis and docking studies of new 4-hydroxyquinoline-3-carbohydrazide derivatives as anti-HIV-1 agents.
29. Dulla, B.; Wan, N.; Franzblau, S. G.; Kapavarapu, R.; Reiser, O.; Iqbal, J.; Pal, M. *Bioorg. Med. Chem. Lett.* **2012**, *22*, 4629-4635. Construction and functionalization of fused pyridine ring leading to noval compounds as potential antitubercular agents.
30. Kumar, D.; Kumar N. M.; Noel, B.; Shah, K. *Eur. J. Med. Chem.* **2012**, *55*, 432-438. A series of 2-arylamino-5-(indolyl)-1,3,4-thiadiazoles as potent cytotoxic agents.
31. Suo, Y.; Ye, Y.; Han, L. *Northwest Inst. Plateau Bio.* **2015**, CN20151038346 A 20150126, Preparation of hydrzinecarbonylindole compounds as antimicrobial agents.
32. Bombrun, A.; Gerber, P.; Church, D. A. *PCT Int. Appl.* **2003**, WO03037328 A1 20030508, Preparation of oxindole hydrazide modulators of protein tyrosine phosphatases (PTPs).
33. Thompson, S. K.; Halbert, S. M.; DesJarlais, R. L.; Tomaszek, T. A.; Levy, M. A.; Tew, D. G.; Ijames, C. F.; Veber, D. F. *Bioorg. Med. Chem.* **1999**, *7*, 599-605. Structure-based design of non-peptide, carbohydrazide-based cathepsin K inhibitors.
34. Monga, V.; Nayyar, A.; Vaitilingam, B.; Palde, P. B.; Jhamb, S. S.; Kaur, S.; Singh, P. P.; Jain, R. *Bioorg. Med. Chem.* **2004**, *12*, 6465-6472. Ring-substituted quinolines. Part 2: synthesis and antimycobacterial activities of ring-substituted quinolinecarbohydrazide and ring-substituted quinolinecarboxamide analogs.
35. Shang, Y.; Hao, Q.; Jiang, K.; He, M.; Wang, J. *Bioorg. Med. Chem. Lett.* **2020**, *30*, 127118. Discovery of heterocyclic carbohydrazide derivatives as novel selective fatty acid amide hydrolase inhibitors: design, synthesis and anti-neuroinflammatory evaluation.
36. Lancelot, J. C.; Maume, D.; Robba, M. *J. Heterocycl. Chem.* **1981**, *18*, 1319-1324. Pyrazolo[1,5-*d*]triazines-1,2,4. I. Dérivés pyrazoliques.
37. Zarghi, A.; Tabatabai, S. A.; Faizi, M.; Ahadian, A.; Navabi, P.; Zanganeh, V.; Shafiee, A. *Bioorg. Med. Chem. Lett.* **2005**, *15*, 1863-1865. Synthesis and anticonvulsant activity of new 2-substituted-5-(2-benzyloxyphenyl)-1,3,4-oxadiazoles.
38. Bera, H.; Tan, B. J.; Sun, L.; Dolzhenko, A. V.; Chui, W. K.; Chiu, G. N. *Eur. J. Med. Chem.* **2013**, *67*, 325-334. A structureeactivity relationship study of 1,2,4-triazolo[1,5-a][1,3,5] triazin-5,7-dione and its 5-thioxo analogs on anti-thymidine phosphorylase and associated anti-angiogenic activities.
39. Crestini, C.; Saladino, R. *Synth. Commun.* **1994**, *24*, 2835-2841. A new efficient and mild synthesis of 2-oxindoles by one-pot Wolff-Kishner-like reduction of isatin derivatives.
40. Amir, M.; Javed, S. A.; Kumar, H. *J. Chin. Chem. Soc.* **2008**, *55*, 201-208. Synthesis of some newer analogs of 4-hydroxyphenyl acetic acid as potent anti-inflammatory agents.
41. Prata, J. V.; Clemente, D. S.; Prabhakar, S.; Lobo, A. M.; Mourato, I.; Branco, P. S. *J. Chem. Soc., Perkin Trans. 1* **2002**, *4*, 513-528. Intramolecular addition of acyldiazenecarboxylates onto double bonds in the synthesis of heterocycles.
42. Bakal, R. L; Gattani, S. G. *Eur. J. Med. Chem.* **2012**, *47*, 278-282. Identification and development of 2,5-disubstituted oxadiazole as potential candidate for treatment of XDR and MDR tuberculosis.
43. Tariq, Q. N.; Malik, S.; Khan, A.; Naseer, M. M.; Khan, S. U.; Ashraf, A.; Ashraf, M.; Rafiq, M.; Mahmood, K.; Tahir, M. N.; Shafiq, Z. *Bioorg. Chem.* **2019**, *84*, 372-383. Xanthenone based hydrazones as potent α- glucosidase inhibitors: synthesis, solid state self-assembly and in silico studies.
44. Khan, K. M.; Rasheed, M.; Ullah, Z.; Hayat, S.; Kaukab, F.; Choudhary, M. I.; Rahman, A.; Perveen, S. *Bioorg. Med. Chem.* **2003**, *11*, 1381-1387. Synthesis and in vitro leishmanicidal activity of some hydrazides and their analogs.
45. Karabanovich, G.; Zemanová, J.; Smutný, T.; Székely, R.; Šarkan, M.; Centárová, I.; Vocat, A.; Pávková, I.; Čonka, P.; Němeček, J.; Stolaříková, J.; Vejsová, M.; Vávrová, K.; Klimešová, V.; Hrabálek, A.; Pável, Cole, S. T.; Mikušová, K.; Roh, J. *J. Med. Chem.* **2016**, *59*, 2362-2380. Development of 3,5-dinitrobenzylsulfanyl-1,3,4-oxadiazoles and thiadiazoles as selective antitubercular agents active against replicating and nonreplicating *Mycobacterium tuberculosis.*





**5. 1H, 13C NMR, and Mass spectrum of compounds**






























































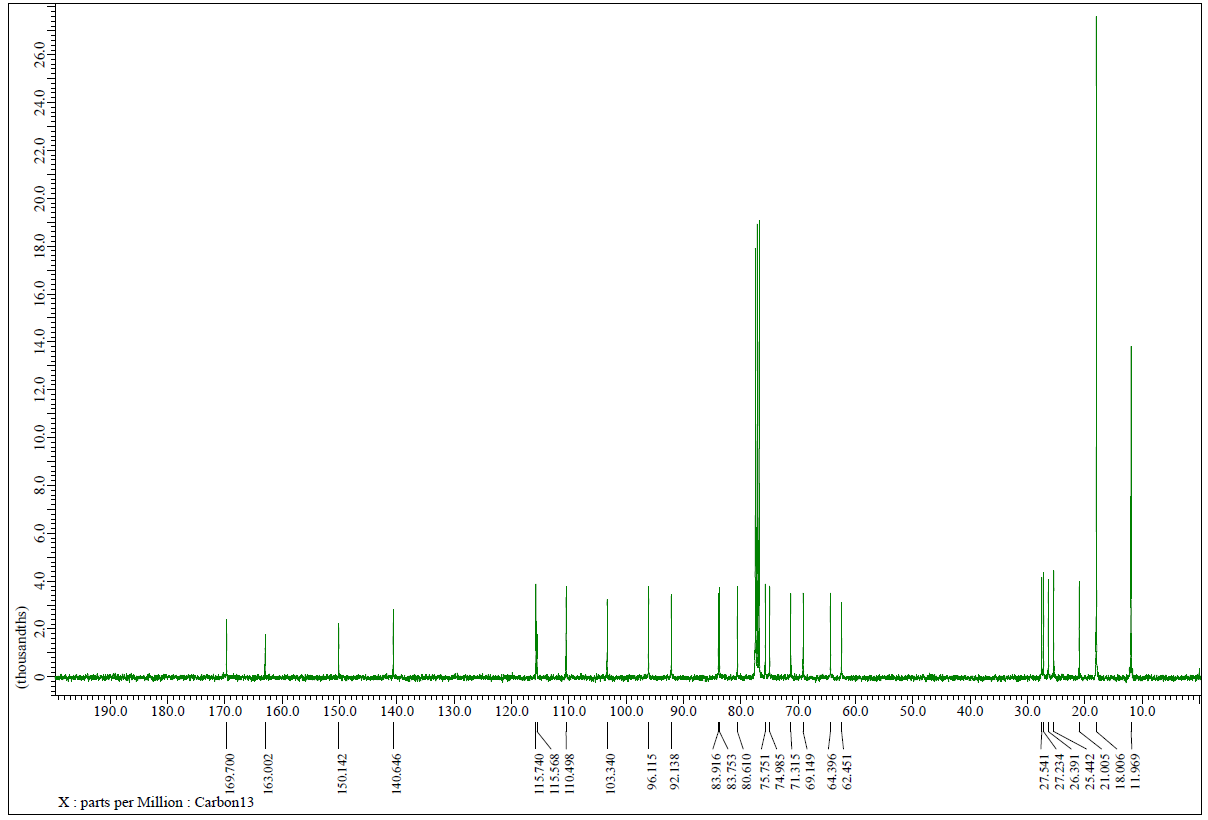

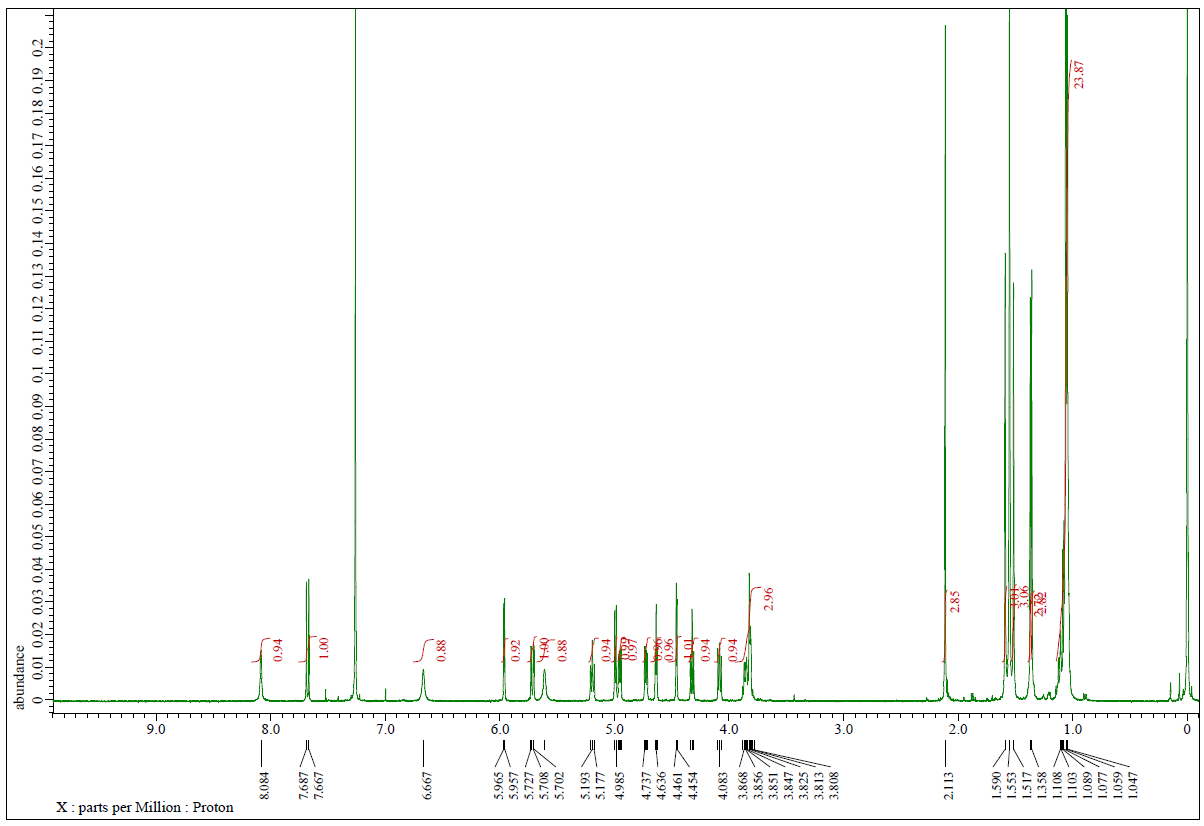


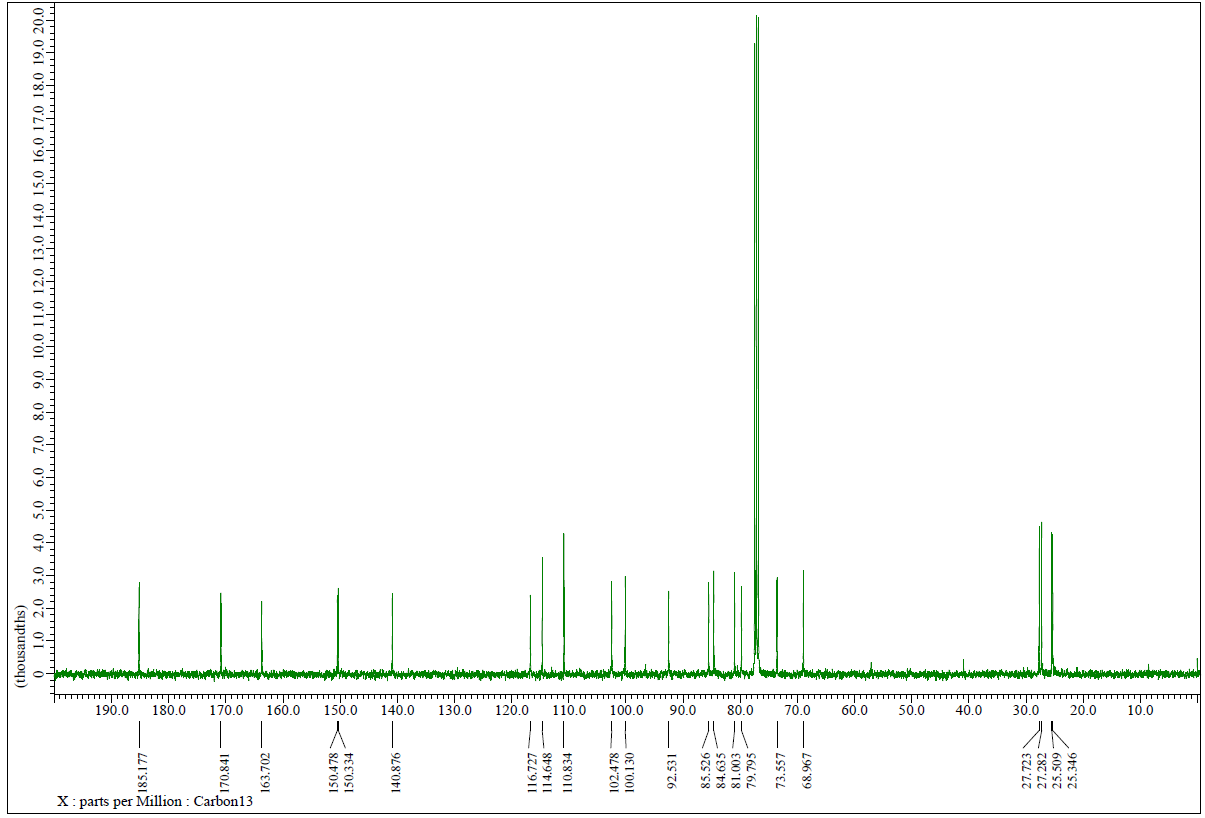

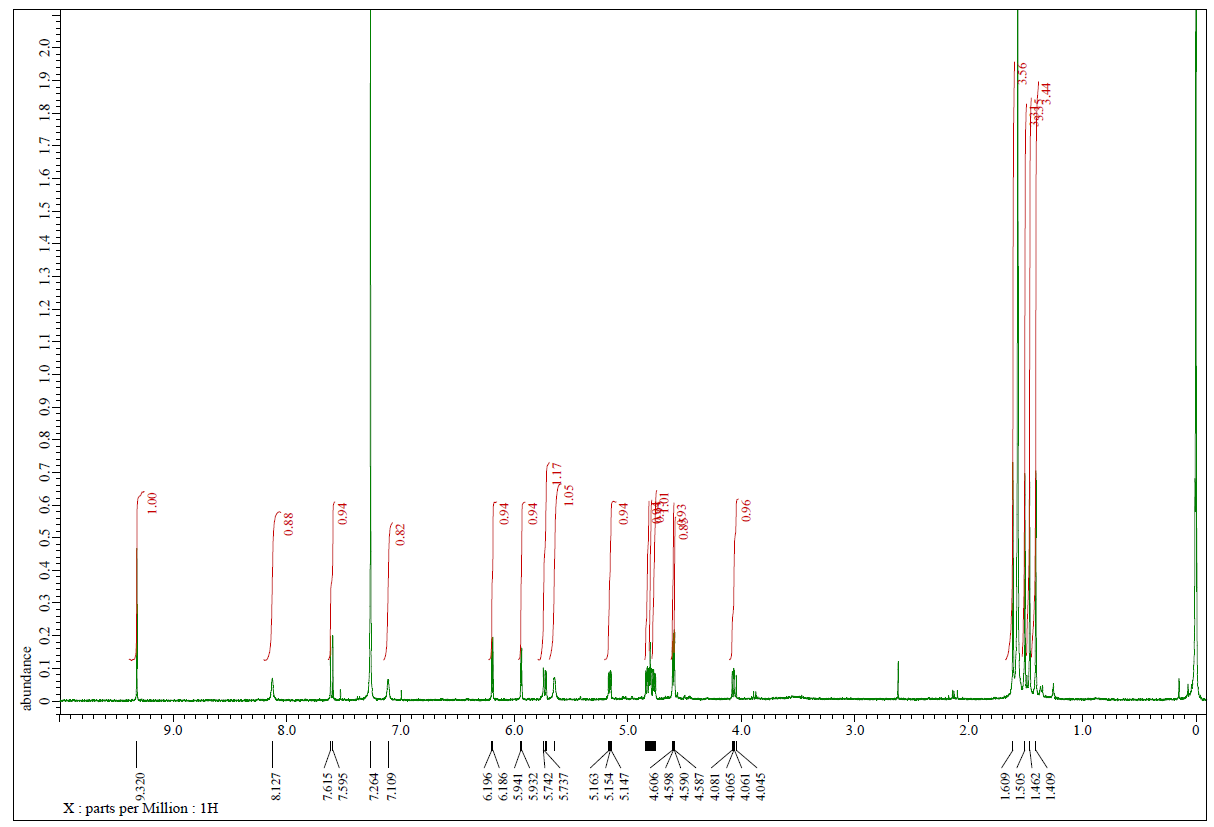


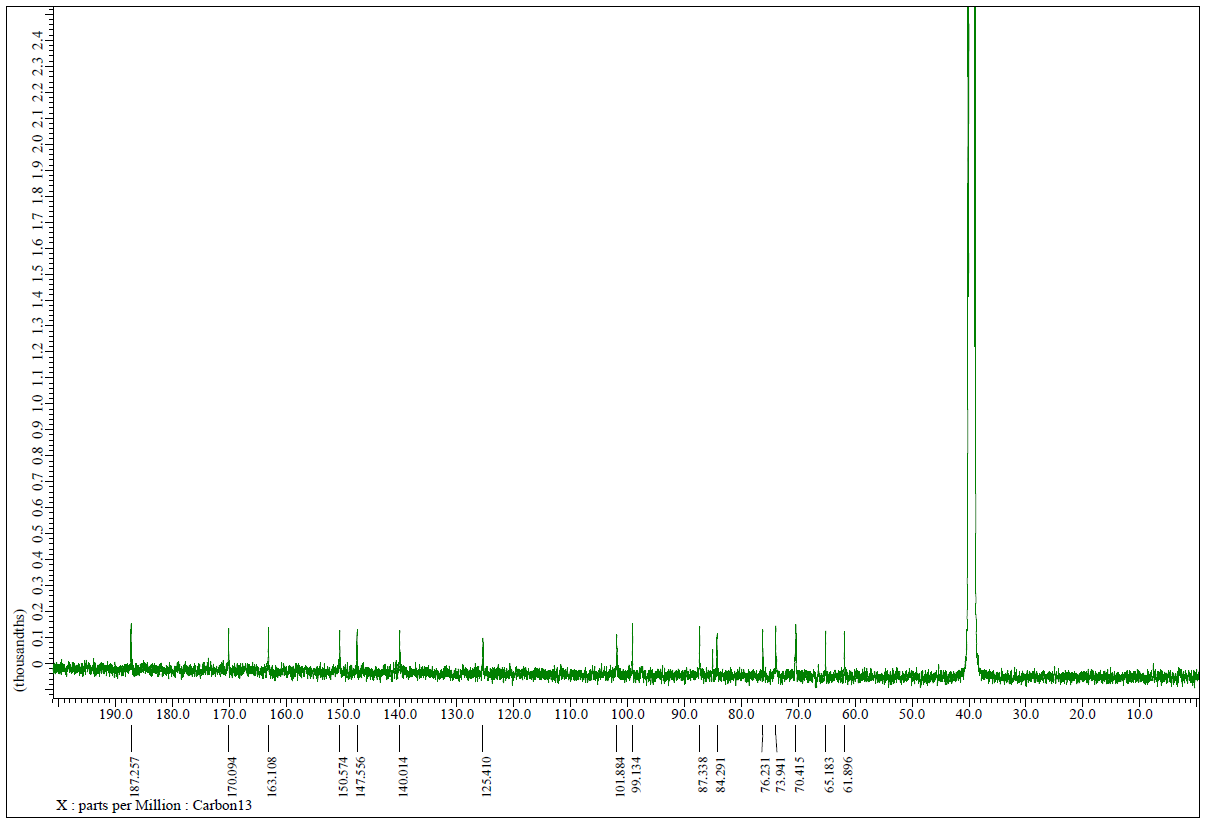

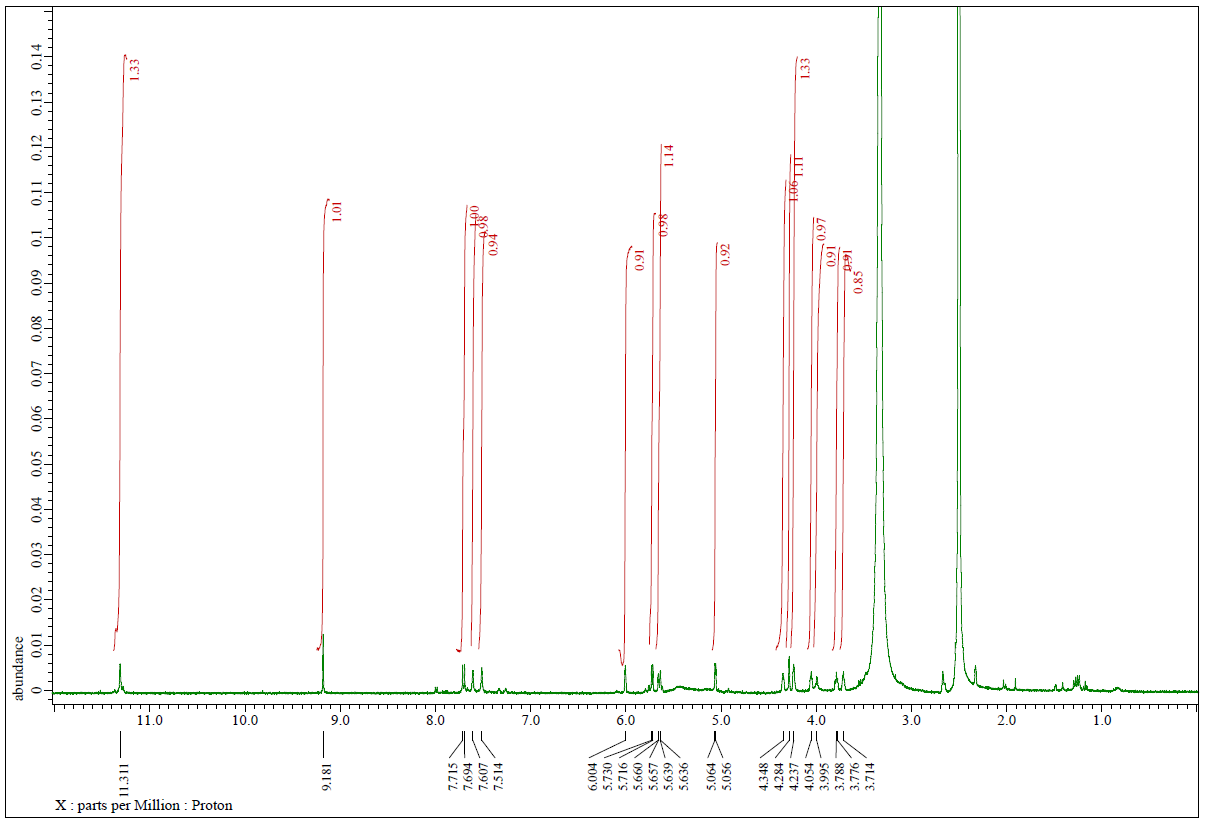

Supplement: Supplementary file 1 [file 52be218895f575973b061467.docx]
